# Supplementary material for: Use of the prevented fraction for the population to determine deaths averted by existing prevalence of physical activity: a descriptive study
Source: PubMed Central journal article supplement (PMC7303949; doi:10.1016/s2214-109x(20)30211-4), 2020-06-17
Supplement: mmc1.pdf [file mmc1.pdf]

# THE LANCET

## Global Health

### Supplementary appendix

This appendix formed part of the original submission and has been peer reviewed. We post it as supplied by the authors.

Supplement to: Strain T, Brage S, Sharp SJ, et al. Use of the prevented fraction for the population to determine deaths averted by existing prevalence of physical activity: a descriptive study. *Lancet Glob Health* 2020; **8**: e920–30.

**Appendix 1. Graphical depictions of the Population Attributable Fraction and the Prevented Fraction for the Population using an example of physical activity.**

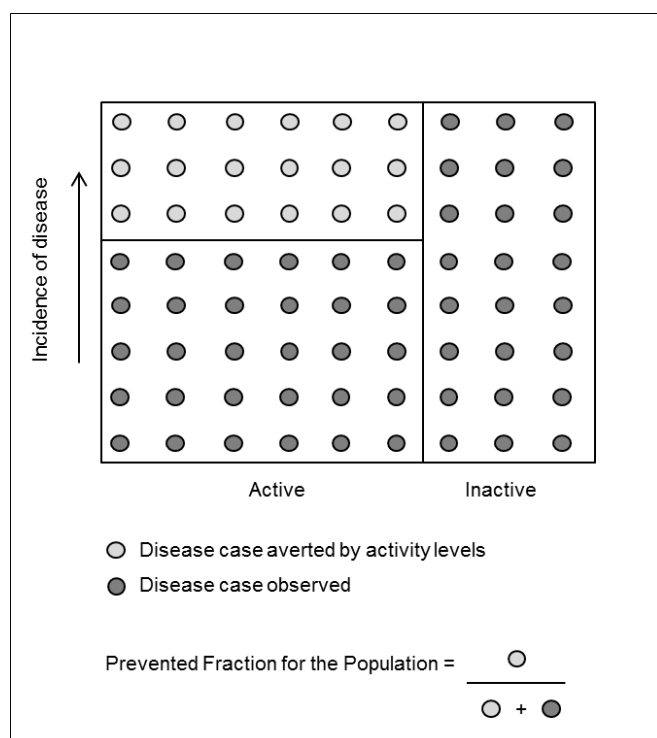

**Figure 1A.** The Prevented Fraction for the Population.

The observed disease cases (the dark grey circles) occur in both the active and the inactive, but the incidence is higher amongst the inactive. The number of cases that are averted by activity levels (the light grey circles) will be determined by the difference in incidence rates and by the prevalence of activity. The sum of the dark and light grey circles represents the hypothetical total number of cases that would be expected if the whole population was inactive. The Prevented Fraction for the Population expresses the number of averted cases (the light grey circles) as a proportion of the hypothetical total number of cases if the whole population were inactive (light + dark grey circles).

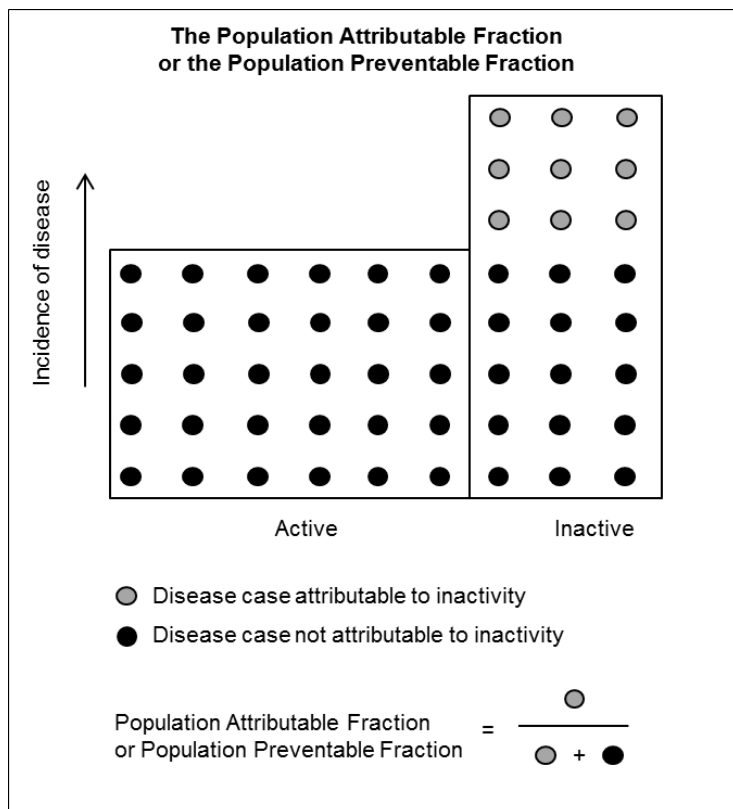

**Figure 1B.** The Population Attributable Fraction (also known as the Population Preventable Fraction)

All circles in this figure represent observed disease cases. The black circles represent cases that occur in both the active and inactive (a ‘baseline’ level of disease incidence). The dark grey circles represent cases that occur in the inactive group, above this ‘baseline’ level. As such, they are considered attributable to inactivity levels. The Population Attributable Fraction and the Population Preventable Fraction express the attributable disease cases (dark grey circles) as a proportion of all observed disease cases (dark grey + black circles), i.e. the potential proportion of cases that could be eliminated if everyone was active.

Figures 1A and 1B adapted from Koepsell, Zatsick, & Rivara (2011) and Spasoff (1999).

Koepsell TD, Zatsick DF, Rivara FP. Estimating the Population Impact of Preventive Interventions from Randomized Trials. *Am J Prev Med* 2011; 40: 191-8.

Spasoff RA. *Epidemiologic Methods for Health Policy*. New York: Oxford University Press; 1999.

## Appendix 2. A literature search to identify examples of the Prevented Fraction for the Population relating to lifestyle behaviours.

Our aim was to identify examples of use of the Prevented Fraction for the Population relating to lifestyle behaviours, such as physical activity, diet and nutrition, alcohol, and smoking. Because of the variety of terms used for the concept, we searched PubMed and WebofScience search engines for the terms “prevented fraction”, “preventive fraction” and “preventable fraction”. We performed this search on the 12<sup>th</sup> March 2019 and updated it on 12<sup>th</sup> June 2019 with no language restrictions.

We obtained the following number of hits

|                      | PubMed | Web of Knowledge | Excluding duplicates |
|----------------------|--------|------------------|----------------------|
| Prevented Fraction   | 125    | 98               | 134                  |
| Preventive Fraction  | 72     | 54               | 77                   |
| Preventable Fraction | 81     | 63               | 92                   |

We categorised the studies based on titles as follows:

|                                                                          | Prevented Fraction | Preventive Fraction | Preventable Fraction |
|--------------------------------------------------------------------------|--------------------|---------------------|----------------------|
| Lifestyle behaviours                                                     | 8                  | 9                   | 12                   |
| Statistical methods                                                      | 15                 | 0                   | 8                    |
| Oral health                                                              | 64                 | 15                  | 1                    |
| Vaccination (animal and human)                                           | 27                 | 11                  | 24                   |
| Genetic (mainly but not exclusively relating to human leukocyte antigen) | 4                  | 23                  | 3                    |
| Cancer screening or surgery                                              | 7                  | 0                   | 1                    |
| Cancer descriptive epidemiology                                          | 2                  | 1                   | 1                    |
| HIV, sexual health and pregnancy                                         | 4                  | 5                   | 4                    |
| Suicide and mental health                                                | 2                  | 3                   | 3                    |
| Other non-behavioural                                                    | 1                  | 10                  | 25                   |
| No title                                                                 | 0                  | 0                   | 10                   |

We read the full texts of all those identified in the ‘lifestyle behaviours’ category to ascertain whether they used the Prevented Fraction for the Population as defined by the International Dictionary of Epidemiology and described in our paper. i.e. they were estimating the proportion of a disease burden that had been averted due to current levels of a risk factor, or that could have been averted due to a given level of a risk factor. These 10 papers are highlighted in grey in the table below along with two further articles, identified through further reading that met these criteria. The other papers generally estimated the proportion of a disease burden that could be averted due to future changes in a risk factor.

| Article                                                          | Identified under Search Term | Description of use                                                                                                                   |
|------------------------------------------------------------------|------------------------------|--------------------------------------------------------------------------------------------------------------------------------------|
| Cuipers et al. (2004)<br>Addiction<br>99(7):839-845              | Prevented Fraction           | They estimated the proportion of deaths prevented by interventions for problem-drinking.                                             |
| Iversen et al. (2018)<br>BMJ 362:k3609                           | Prevented Fraction           | They estimated the proportion of ovarian cancers prevented by hormonal contraception use.                                            |
| Jordan et al. (2015)<br>Aus N Z Public Health<br>39(5):441-445   | Prevented Fraction           | They estimated the proportion of endometrial and ovarian cancers prevented through use of the combined oral contraceptive pill.      |
| Jordan et al. (2015)<br>Aus N Z Public Health<br>39(5):418-421   | Prevented Fraction           | They estimated the proportion of breast cancers that could be prevented if breast feeding prevalence and durations were increased.   |
| McIsaac et al. (2015)<br>Can J Public Health<br>106(4):E217-E222 | Prevented Fraction           | They estimated the proportion of sudden infant death and other diseases that could be prevented by breast feeding.                   |
| Olson et al. (2015)<br>Aus N Z Public Health<br>39(5):471-476    | Prevented Fraction           | They estimated the proportion of squamous cell carcinoma and melanomas prevented by sun screen use.                                  |
| Poulstrup et al. (2000)<br>Eur J Pub Health<br>10(1):45-50       | Prevented Fraction           | They estimated the proportion of fractures prevented during an 18-month intervention compared to a control group.                    |
| Wilson et al. (2015)<br>Aus N Z J Public Health<br>39(5):414-417 | Prevented Fraction           | They estimated the proportion of colorectal and oesophageal cancers prevented by daily aspirin use.                                  |
| Caru et al. 2018<br>World J Cardiol<br>10(4):26-34               | Preventive Fraction          | They estimated the proportion of various health outcomes prevented by different levels of physical fitness amongst cardiac patients. |
| Carnethon et al. 2010<br>Hypertension<br>56(1):49-55             | Preventive Fraction          | They estimated the proportion of hypertension cases that could be prevented if participants increased their fitness.                 |
| Iversen et al. 2017<br>Am J Obstet Gynecol<br>216(6):580         | Preventive Fraction          | They estimated the percentage of cancer reduction that could be prevented by combined oral contraception use.                        |

|                                                                                                          |                      |                                                                                                                                                           |
|----------------------------------------------------------------------------------------------------------|----------------------|-----------------------------------------------------------------------------------------------------------------------------------------------------------|
| Lemay et al. 2019<br>J Pediatr Hematol Oncol<br>doi as online only:<br>10.1097/MPH.0000000000<br>0001426 | Preventive Fraction  | They estimated the proportion of various health outcomes prevented by an increase in fitness level.                                                       |
| Mayne et al. 2018<br>Circulation<br>138(6):557-566                                                       | Preventive Fraction  | They estimated the proportion of cardiovascular disease cases that could be prevented by smoke-free policies.                                             |
| N'Krumah et al. 2016<br>PLoS Negl Trop Dis<br>10(1): e0004327                                            | Preventive Fraction  | Unclear. Implies they estimated the proportion of Buruli ulcer cases that could be prevented by various protective strategies.                            |
| Salihu et al. 2011<br>J Matern<br>Fetal Neonatal Med<br>24(9):1088-1094                                  | Preventive Fraction  | They estimated the proportion of neonatal complications and maternal morbidities that could be prevented with the elimination of maternal obesity.        |
| Seddon et al. 2006<br>Arch Ophthalmol<br>124(7):995-1001                                                 | Preventive Fraction  | They estimated the proportion of age-related macular degeneration that could be prevented by increased omega-3 fatty acid levels consumption.             |
| Trajkova et al. 2017<br>Int J Public Health<br>62(7):775-786                                             | Preventive Fraction  | They estimated the burden of stroke that could be prevented if all smokers became former smokers.                                                         |
| Bendich et al. (1997)<br>West J Med<br>166(5):306-312                                                    | Preventable Fraction | They estimated the proportion of disease that could have been prevented had vitamin intake been at the recommended levels.                                |
| Center for Disease<br>Control<br>MMWR Rcomm Rep<br>44(RR10):1-10                                         | Preventable Fraction | A description on the process of evaluating disease and injury prevention programs.                                                                        |
| Fitzgerald et al. (2002)<br>Nutr Cancer<br>43(2):127-132                                                 | Preventable Fraction | They estimated the proportion of cancer incidence that could be prevented by improvements in diet quality.                                                |
| Hagel et al. (2001)<br>Inj Prev<br>7(1):78                                                               | Preventable Fraction | A comment on Kopjar (2002)                                                                                                                                |
| Kopjar (2002)<br>Inj Prev<br>6(3):235-238                                                                | Preventable Fraction | The author estimated the proportion of injuries that could be prevented due to cycling helmet use.*                                                       |
| Mo et al. (2019)<br>BMC Public Health<br>19(1):707                                                       | Preventable Fraction | They estimated the proportion of disability-adjusted life years for cardiovascular diseases associated with five scenarios of fruit and vegetable intake. |
| Norat et al. (2002)<br>Int J Cancer<br>98(2):241-256                                                     | Preventable Fraction | They estimated the proportion of colorectal cancer that could be prevented if red meat intake is reduced to 70 g/week.**                                  |
| Patel et al. (2015)<br>Ann Intern Med<br>163(4):245-253                                                  | Preventable Fraction | They estimated the proportion of cardiovascular mortality that could be prevented with the elimination of elevated cholesterol levels,                    |

|                                                                 |                                |                                                                                                                                                                                                                  |
|-----------------------------------------------------------------|--------------------------------|------------------------------------------------------------------------------------------------------------------------------------------------------------------------------------------------------------------|
|                                                                 |                                | diabetes, hypertension, obesity, and smoking.                                                                                                                                                                    |
| Peleteiro et al. (2016)<br>Br J Nutr<br>115(5):851-859          | Preventable Fraction           | They estimated the proportion and absolute number of gastric cancer cases that could have been prevented had fruit and vegetable intake been at the theoretical minimum risk level in 2012.                      |
| Tamakoshi et al. (2009)<br>Preventive Medicine<br>48(5):486-492 | Preventable Fraction           | They estimated the proportion of mortality that could be prevented by improving lifestyle behaviours.                                                                                                            |
| Tominaga (1998)<br>Gan To Kagaku Ryoho<br>25(6):789-796         | Preventable Fraction           | They estimated the proportion of cancers that could be prevented by reducing smoking levels.                                                                                                                     |
| Vainio et al. (2006)<br>Nutr Cancer<br>54(1):111-142            | Preventable Fraction           | They estimated the proportion of cancers that could be preventable by increasing fruit and vegetable intake.                                                                                                     |
| Andersen et al. (2018)<br>J Trans Health<br>9:217-225           | Identified through own reading | They estimated the proportion of disease burden prevented due to cycling behaviour.                                                                                                                              |
| Kahlmeier et al. (2017)<br>World Health Organization report     | Identified through own reading | The report summarizes the method behind the Health Economic Assessment tool (HEAT) for walking and cycling that can be used to quantify the reduction in mortality risk of current levels of walking or cycling. |

\*This paper uses the terminology of ‘the proportion of injuries that have been prevented’ due to a given level of cycling helmet use, but further inspection of the formulae presented and the text description confirmed it did not meet the definition of the Prevented Fraction for the Population described in the paper.

\*\*This paper is ambiguous in its language and formulae referred to.

We also selected a random sample of papers in the other categories, across the search terms used, to investigate whether the concept in question was being used. We identified examples across all categories e.g.

#### Oral health:

Richards D. Substantial reduction in caries from regular fluoride varnish application. Evid Based Dent 2013; 14(3): 72-3.

#### Vaccine:

Kostova D, Reed C, Finelli L, et al. Influenza Illness and Hospitalizations Averted by Influenza Vaccination in the United States, 2005-2011. *PLoS one* 2013; 8(6): e66312.

#### Genetic research:

Stutzmann F, Vatin V, Cauchi S, et al. Non-synonymous polymorphisms in melanocortin-4 receptor protect against obesity: the two facets of a Janus obesity gene. *Human molecular genetics* 2007; 16(15): 1837-44.

#### Cancer screening:

Stock C, Knudsen AB, Lansdorp-Vogelaar I, Haug U, Brenner H. Colorectal cancer mortality prevented by use and attributable to nonuse of colonoscopy. *Gastrointest Endosc* 2011; 73(3): 435-43.

#### Descriptive cancer epidemiology:

Whiteman DC, Webb PM, Green AC, et al. Cancers in Australia in 2010 attributable to modifiable factors: summary and conclusions. *Australian and New Zealand Journal of Public Health* 2015; 39(5): 477-84.

#### HIV, sexual health and pregnancy

Steiner MJ, Taylor DJ, Feldblum PJ, Wheelless AJ. How well do male latex condoms work? Pregnancy outcome during one menstrual cycle of use. *Contraception* 2000;62:315-9.

#### Suicide and mental health

Knox KL, Litts DA, Talcott GW, Feig JC, Caine ED. Risk of suicide and related adverse outcomes after exposure to a suicide prevention programme in the US Air Force: cohort study. *BMJ* 2003;327:1376.



### Appendix 3: Derivation of alternative Prevented Fraction for the Population formula (Formula 2).

Formulae 1 and 2, both presented in Box 1, are equivalent. Prevented Fraction for the Population is abbreviated to PFP in the following formulae.

$$PFP = \frac{I_u - I_p}{I_u} \quad (\text{Formula 1})$$

$I_p$  can be expressed as

$$I_p = P_u \cdot I_u + P_e \cdot I_e \quad (\text{B})$$

$P_u$  can be expressed as

$$P_u = 1 - P_e \quad (\text{C})$$

And  $I_e$  can be expressed as

$$I_e = I_u \cdot RR \quad (\text{D})$$

Substituting Formulae C and D into B,  $I_p$  can be expressed as

$$I_p = (1 - P_e) \cdot I_u + P_e \cdot I_u \cdot RR \quad (\text{E})$$

Substituting Formula E into Formula 1, the PFP can be defined as:

$$PFP = \frac{I_u - ((1 - P_e) \cdot I_u + P_e \cdot I_u \cdot RR)}{I_u} \quad (\text{F})$$

This can be rearranged to the following Formulae G and H, eventually simplifying to Formula 2:

$$PFP = \frac{I_u - I_u + P_e \cdot I_u - P_e \cdot I_u \cdot RR}{I_u} \quad (\text{G})$$

$$PFP = \frac{P_e \cdot I_u (1 - RR)}{I_u} \quad (\text{H})$$

$$PFP = P_e (1 - RR) \quad (\text{Formula 2})$$

### Appendix 4: Derivation of ‘adjusted’ Prevented Fraction for the Population formula (Formula 3)

There are two stages to the derivation of this formula: calculating  $P_d$  from  $P_e$  and then substituting that into Formula 2. Prevented Fraction for the Population is abbreviated to PFP in the following formulae.

The prevalence of activity amongst cases ( $P_d$ ) is defined as the number of cases that were active over the total number of cases:

$$P_d = (P_e \cdot I_e \cdot n) / ((P_e \cdot I_e \cdot n) + (P_u \cdot I_u \cdot n)) \quad (A)$$

Divide numerator and denominator by  $I_u$ , cancel out  $n$ , replace  $P_u$  as  $1 - P_e$

$$P_d = (P_e \cdot RR) / ((P_e \cdot RR) + (1 - P_e)) \quad (Formula 4)$$

Rearrange this to solve for  $P_e$

$$P_d(P_e \cdot RR - P_e + 1) = P_e \cdot RR \quad (B)$$

$$P_e \left( P_d \cdot RR - P_d + \frac{P_d}{P_e} \right) = P_e \cdot RR \quad (C)$$

$$P_d \cdot RR - P_d - RR = - \frac{P_d}{P_e} \quad (D)$$

$$P_e = \frac{P_d}{(1 - (1 - P_d)(1 - RR))} \quad (E)$$

Now substitute into Formula 2:

$$PFP = \frac{P_d(1 - RR)}{(1 - (1 - P_d)(1 - RR))} \quad (Formula 3)$$

## Appendix 5: Study Protocol

### Final analysis plan – confirmed 24/04/19\*

Aim: to estimate the Prevented Fraction for the Population from physical activity for all-cause mortality for 168 countries

Data sources: prevalence data from Guthold et al. (2018); relative risks from Lee et al. (2012); number of premature deaths in country from United Nations (downloaded 2019).

Formula used in Monte-Carlo simulations:

- Adjusted Prevented Fraction for the Population, zero counterfactual (main analyses)
- Unadjusted Prevented Fraction for the Population, zero counterfactual
- Adjusted Prevented Fraction for the Population, minimum plausible risk counterfactual

Minimum plausible risk determined by median of the lowest observed prevalence of activity in each region\*.

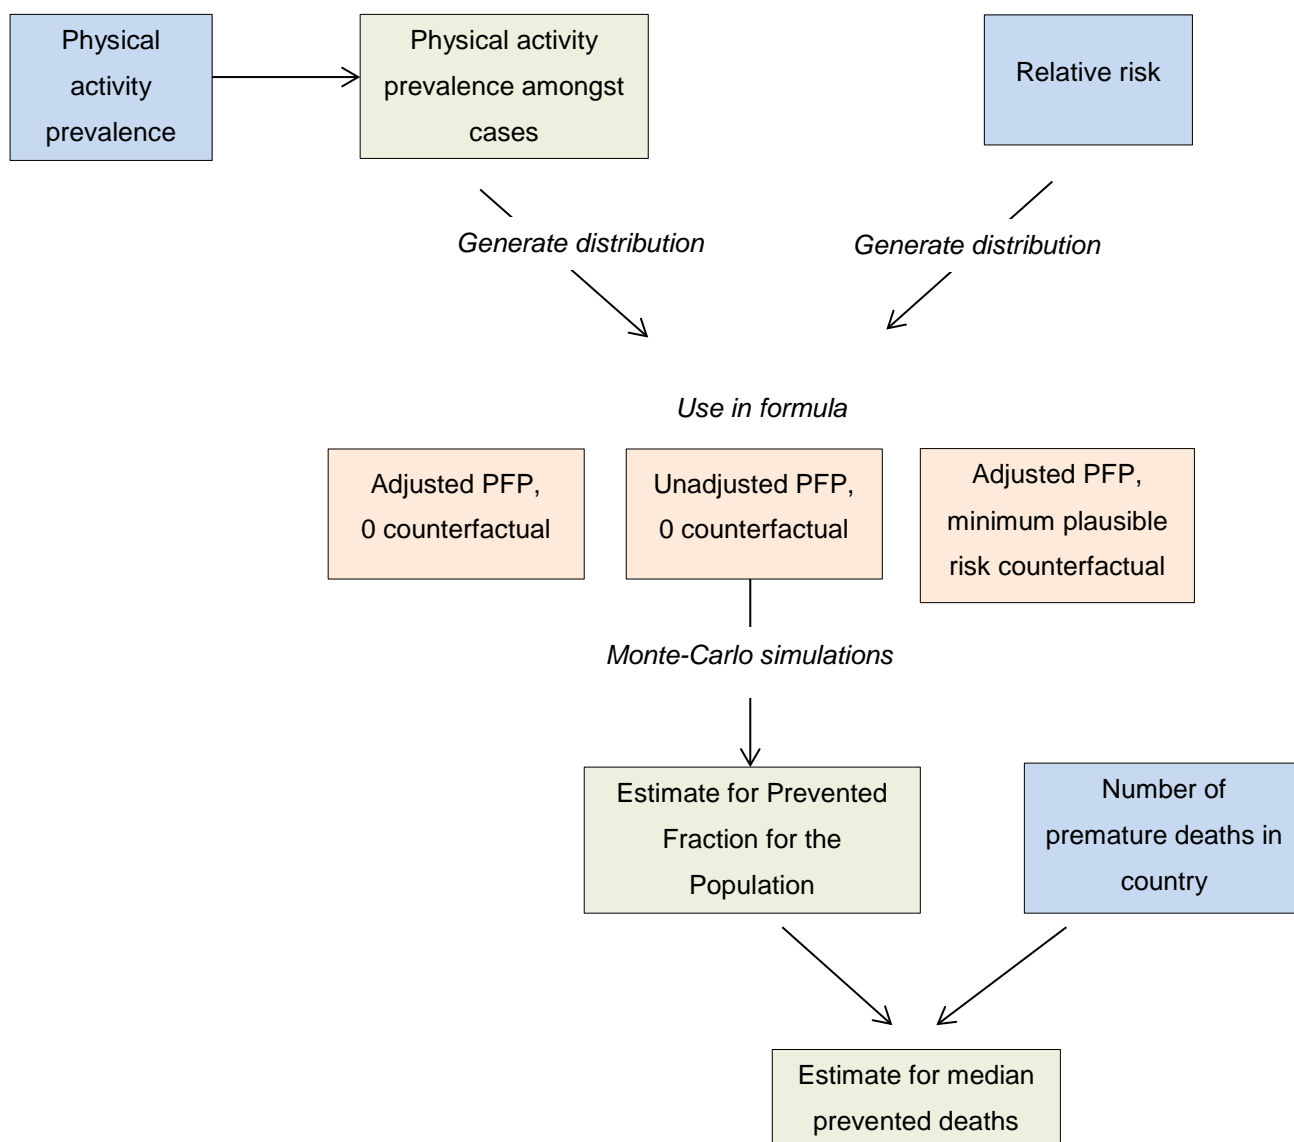

\*the decision to use this counterfactual rather than the lowest observed national prevalence was made in July 2019 following discussions within the author team. The reasons for this decision are explained in the manuscript.

### **Modifications made to the analysis plan 2017-2019:**

#### Version 1:

- Unadjusted and adjusted analyses
- Zero counterfactual
- All cause mortality and coronary heart disease
- No prediction of number of deaths
- Using prevalence data from Ding et al. (2016)
- Using relative risks from Lee et al. (2012) and Sattlemair et al. (2011)

#### Version 2:

- Add in a non-zero counterfactual because of concerns that 0% of the population meeting the physical activity guidelines is not realistic.
- To be conservative in the estimates of the benefits of physical activity, we considered a 10% level as a counterfactual.
- We looked at using adjusted and unadjusted non-zero counterfactual formulae

#### Version 3:

- We could not find justification for a 10% counterfactual, or a reasonable justification for any absolute level.
- We therefore decided to use the minimum observed levels for a country, and term this the minimum plausible risk.
- Guthold et al. (2018) published more up to date, harmonised, prevalence data for more nations so we changed our data source
- We removed the coronary heart disease analyses to streamline the paper's results
- We removed the unadjusted non-zero counterfactual results to streamline the paper
- We decided to estimate the number of deaths corresponding to the estimated Prevented Fractions for the Population to aid interpretation

#### Edits made after Review 1 from Lancet Global Health (Feb 2020):

- We added in sex-specific results.
- We confirmed that the mortality data from the United Nations was the most appropriate to use. Although there are other sources of non-communicable disease deaths, they are not by age group

## Appendix 6. Overview of method.

### Data processing

Generate a binomial distribution (p,n) for prevalence of activity amongst cases

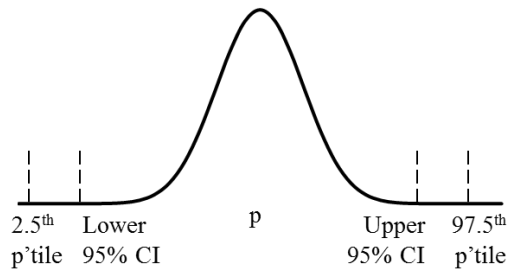

p = prevalence of activity amongst cases  
n = incrementally increased to minimise distance between 2.5<sup>th</sup>/97.5<sup>th</sup> percentiles and the known lower/upper 95% CI bounds

Generate a normal distribution (u,sd) for the log of the relative risk

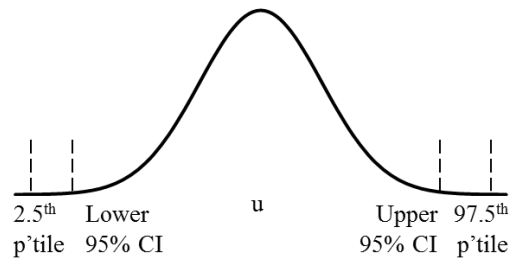

u = log(relative risk)  
sd = incrementally decreased to minimise distance between 2.5<sup>th</sup>/97.5<sup>th</sup> percentiles and the known lower/upper 95% CI bounds

### Data analysis

Randomly select one value from each of the prevalence and relative risk distributions and use in appropriate Prevented Fraction for the Population formula  
Repeat 10,000 simulations

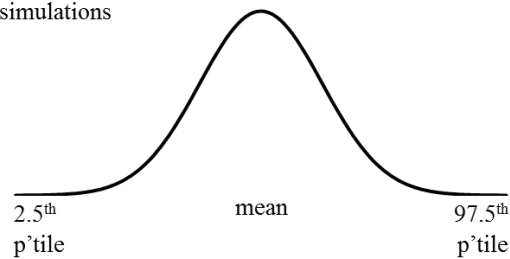

Prevented Fraction for the Population = mean of the 10,000 simulations  
2.5<sup>th</sup>/97.5<sup>th</sup> percentiles are the 95% confidence intervals

When estimating the 'unadjusted' Prevented Fraction for the Population, the prevalence distribution was the prevalence of activity ( $P_e$ ).

We did not model any variance around the prevalence of activity ( $P_e$ ) or prevalence of activity amongst cases ( $P_a$ ) for the counterfactual scenarios.

**Appendix 7. Obtained and generated distributions for the relative risks of all-cause mortality due to physical activity**

|            | Obtained data                                             |                          | Generated distribution       |                          |
|------------|-----------------------------------------------------------|--------------------------|------------------------------|--------------------------|
|            | RR (95% CI) of inactivity obtained from Lee et al. (2012) | RR (95% CI) for activity | Standard deviation parameter | RR (95% CI) for activity |
| Unadjusted | 1.47 (1.38-1.57)                                          | 0.68 (0.64-0.72)         | 0.04                         | 0.68 (0.63-0.74)         |
| Adjusted   | 1.28(1.21-1.36)                                           | 0.78 (0.74-0.83)         | 0.04                         | 0.78 (0.72-0.85)         |

**Appendix 8. Obtained and generated prevalence distributions for the 168 countries.**

| World Health Organization region | World Bank Income classification | Country               | Data from Guthold et al. (2018) |                                      | Generated distribution      |                                      | Prevalence of activity amongst those that died (%), (95% CI) | Generated distribution      |                                      |
|----------------------------------|----------------------------------|-----------------------|---------------------------------|--------------------------------------|-----------------------------|--------------------------------------|--------------------------------------------------------------|-----------------------------|--------------------------------------|
|                                  |                                  |                       | Year                            | Prevalence of activity (%), (95% CI) | n for binomial distribution | Prevalence of activity (%), (95% CI) |                                                              | n for binomial distribution | Prevalence of activity (%), (95% CI) |
| Africa                           |                                  |                       |                                 |                                      |                             |                                      |                                                              |                             |                                      |
|                                  | High                             |                       |                                 |                                      |                             |                                      |                                                              |                             |                                      |
|                                  |                                  | Seychelles            | 2013                            | 81.2 (74.8-86.2)                     | 138                         | 81.2 (74.6-87.7)                     | 74.6 (66.9-80.9)                                             | 117                         | 74.6 (66.7-82.1)                     |
|                                  | Upper-middle                     |                       |                                 |                                      |                             |                                      |                                                              |                             |                                      |
|                                  |                                  | Algeria               | 2003                            | 66.4 (57.3-74.5)                     | 100                         | 66.4 (57.0-75.0)                     | 57.3 (47.7-66.5)                                             | 93                          | 57.4 (47.3-66.7)                     |
|                                  |                                  | Botswana              | 2014                            | 78.3 (72.5-83.1)                     | 192                         | 78.3 (72.4-83.9)                     | 71.0 (64.2-77.0)                                             | 161                         | 71.0 (64.0-77.6)                     |
|                                  |                                  | Gabon                 | 2009                            | 74.7 (66.5-81.5)                     | 107                         | 74.7 (66.4-82.2)                     | 66.8 (57.4-75.0)                                             | 93                          | 66.7 (57.0-76.3)                     |
|                                  |                                  | Mauritius             | 2003                            | 70.2 (62.2-77.2)                     | 121                         | 70.2 (62.0-78.5)                     | 61.6 (52.8-69.7)                                             | 114                         | 61.6 (52.6-70.2)                     |
|                                  |                                  | Namibia               | 2003                            | 66.6 (58.9-73.6)                     | 138                         | 66.6 (58.7-74.6)                     | 57.6 (49.4-65.5)                                             | 135                         | 57.6 (48.9-65.9)                     |
|                                  |                                  | South Africa          | 2009                            | 61.8 (53.2-69.9)                     | 119                         | 61.8 (52.9-70.6)                     | 52.4 (43.6-61.2)                                             | 115                         | 52.4 (43.5-61.7)                     |
|                                  | Lower-middle                     |                       |                                 |                                      |                             |                                      |                                                              |                             |                                      |
|                                  |                                  | Cabo Verde            | 2007                            | 80.3 (74.7-85.0)                     | 193                         | 80.3 (74.6-86.0)                     | 73.5 (66.8-79.4)                                             | 162                         | 73.5 (66.7-80.3)                     |
|                                  |                                  | Cameroon              | 2003                            | 71.5 (64.9-77.3)                     | 170                         | 71.5 (64.7-78.2)                     | 63.0 (55.7-69.8)                                             | 157                         | 63.0 (55.4-70.7)                     |
|                                  |                                  | Congo                 | 2003                            | 72.0 (64.5-78.4)                     | 135                         | 72.0 (64.4-79.3)                     | 63.6 (55.3-71.2)                                             | 122                         | 63.6 (54.9-72.1)                     |
|                                  |                                  | Côte d'Ivoire         | 2005                            | 66.9 (60.6-73.3)                     | 190                         | 66.9 (60.0-73.7)                     | 57.9 (51.1-65.1)                                             | 165                         | 57.9 (50.3-65.5)                     |
|                                  |                                  | Eswatini              | 2013                            | 72.0 (67.1-76.9)                     | 302                         | 72.0 (66.9-77.2)                     | 63.6 (58.1-69.4)                                             | 253                         | 63.6 (57.7-69.6)                     |
|                                  |                                  | Ghana                 | 2009                            | 78.2 (73.7-82.7)                     | 288                         | 78.2 (73.3-83.0)                     | 70.9 (65.6-76.5)                                             | 240                         | 70.9 (65.0-76.7)                     |
|                                  |                                  | Kenya                 | 2015                            | 84.6 (82.2-86.9)                     | 853                         | 84.6 (82.2-87.0)                     | 78.9 (75.8-81.9)                                             | 676                         | 78.9 (75.7-82.0)                     |
|                                  |                                  | Lesotho               | 2012                            | 93.7 (91.4-95.5)                     | 430                         | 93.7 (91.4-95.8)                     | 91.0 (87.8-93.5)                                             | 312                         | 91.0 (87.8-93.9)                     |
|                                  |                                  | Mauritania            | 2006                            | 58.7 (50.8-66.6)                     | 139                         | 58.7 (50.4-66.9)                     | 49.1 (41.2-57.6)                                             | 126                         | 49.1 (40.5-57.9)                     |
|                                  |                                  | Nigeria               | 2011                            | 72.9 (66.5-78.5)                     | 185                         | 72.9 (66.5-79.5)                     | 64.7 (57.4-71.3)                                             | 164                         | 64.7 (57.3-72.0)                     |
|                                  |                                  | São Tomé and Príncipe | 2009                            | 84.5 (79.8-88.3)                     | 227                         | 84.5 (79.7-89.0)                     | 78.8 (72.9-83.7)                                             | 180                         | 78.7 (72.8-84.4)                     |
|                                  |                                  | Zambia                | 2008                            | 77.9 (73.2-82.7)                     | 259                         | 77.9 (72.6-83.0)                     | 70.6 (65.0-76.5)                                             | 207                         | 70.5 (64.3-76.8)                     |





|  |              |                                  |      |                  |     |                  |                  |     |                  |
|--|--------------|----------------------------------|------|------------------|-----|------------------|------------------|-----|------------------|
|  | High         |                                  |      |                  |     |                  |                  |     |                  |
|  |              | Argentina                        | 2013 | 58.4 (50.0-66.4) | 134 | 58.4 (50.0-66.4) | 48.8 (40.5-57.3) | 123 | 48.8 (39.8-57.7) |
|  |              | Bahamas                          | 2011 | 56.7 (48.1-65.1) | 122 | 56.7 (47.5-65.6) | 47.1 (38.7-55.9) | 119 | 47.1 (37.8-56.3) |
|  |              | Barbados                         | 2012 | 57.1 (48.3-65.9) | 110 | 57.1 (48.2-66.4) | 47.5 (38.8-56.8) | 103 | 47.5 (37.9-57.3) |
|  |              | Bermuda                          | 2014 | 73.8 (65.4-80.8) | 106 | 73.8 (65.1-82.1) | 65.7 (56.2-74.1) | 93  | 65.7 (55.9-75.3) |
|  |              | British Virgin Islands           | 2009 | 72.6 (65.1-79.1) | 128 | 72.6 (64.8-80.5) | 64.3 (55.9-72.0) | 122 | 64.3 (55.7-73.0) |
|  |              | Canada                           | 2003 | 71.4 (63.7-78.1) | 123 | 71.4 (63.4-78.9) | 62.9 (54.4-70.8) | 120 | 62.9 (54.2-71.7) |
|  |              | Cayman Islands                   | 2012 | 70.9 (62.5-78.1) | 106 | 70.9 (62.3-79.3) | 62.4 (53.1-70.8) | 104 | 62.3 (52.9-71.2) |
|  |              | Chile                            | 2009 | 73.4 (66.4-80.4) | 136 | 73.4 (66.2-80.9) | 65.2 (57.3-73.6) | 116 | 65.3 (56.9-74.1) |
|  |              | Saint Kitts and Nevis            | 2007 | 67.8 (58.8-75.7) | 101 | 67.8 (58.4-76.2) | 58.9 (49.2-67.9) | 96  | 58.9 (49.0-68.8) |
|  |              | Trinidad and Tobago              | 2011 | 61.8 (50.4-72.2) | 66  | 61.8 (50.0-72.7) | 52.4 (40.9-63.8) | 65  | 52.4 (40.0-64.6) |
|  |              | United States of America         | 2014 | 60.0 (52.7-67.0) | 164 | 60.0 (52.4-67.7) | 50.5 (43.1-58.0) | 163 | 50.5 (42.9-58.3) |
|  |              | Uruguay                          | 2013 | 77.6 (71.0-83.1) | 151 | 77.6 (70.9-84.1) | 70.2 (62.5-77.0) | 127 | 70.2 (62.2-78.0) |
|  | Upper-middle |                                  |      |                  |     |                  |                  |     |                  |
|  |              | Bolivarian Republic of Venezuela | 2008 | 68.6 (60.0-76.0) | 112 | 68.6 (59.8-76.8) | 59.8 (50.5-68.3) | 100 | 59.8 (50.0-69.0) |
|  |              | Brazil                           | 2016 | 53.0 (44.7-61.1) | 133 | 53.0 (44.4-61.7) | 43.4 (35.5-51.6) | 131 | 43.4 (35.1-51.9) |
|  |              | Colombia                         | 2010 | 56.0 (47.3-64.6) | 119 | 56.0 (47.1-64.7) | 46.4 (37.9-55.4) | 111 | 46.4 (36.9-55.9) |
|  |              | Costa Rica                       | 2014 | 53.9 (45.6-62.1) | 133 | 53.9 (45.1-62.4) | 44.3 (36.3-52.7) | 130 | 44.3 (36.2-53.1) |
|  |              | Cuba                             | 2010 | 63.1 (54.8-70.8) | 123 | 63.1 (54.5-71.5) | 53.8 (45.2-62.2) | 125 | 53.8 (44.8-62.4) |
|  |              | Dominica                         | 2007 | 78.4 (72.0-83.7) | 160 | 78.4 (71.9-84.4) | 71.2 (63.6-77.7) | 131 | 71.2 (63.4-78.6) |
|  |              | Dominican Republic               | 2003 | 61.0 (52.3-69.1) | 119 | 61.0 (52.1-69.8) | 51.5 (42.7-60.3) | 116 | 51.5 (42.2-60.3) |
|  |              | Ecuador                          | 2013 | 72.8 (65.4-80.3) | 120 | 72.8 (65.0-80.8) | 64.5 (56.2-73.5) | 97  | 64.5 (54.6-74.2) |
|  |              | Grenada                          | 2011 | 71.3 (62.8-78.6) | 104 | 71.3 (62.5-79.8) | 62.8 (53.4-71.4) | 98  | 62.8 (53.1-72.5) |
|  |              | Guatemala                        | 2003 | 62.9 (52.6-72.1) | 84  | 62.9 (52.4-72.6) | 53.5 (43.0-63.7) | 78  | 53.5 (42.3-64.1) |



|  | High |             |      |                  |     |                  |                  |     |                  |
|--|------|-------------|------|------------------|-----|------------------|------------------|-----|------------------|
|  |      | Andorra     | 2004 | 61.6 (53.4-69.2) | 128 | 61.6 (53.1-69.5) | 52.2 (43.8-60.4) | 129 | 52.2 (43.4-60.5) |
|  |      | Austria     | 2013 | 69.9 (63.2-75.9) | 173 | 69.9 (63.0-76.3) | 61.2 (53.9-68.2) | 162 | 61.2 (53.7-68.5) |
|  |      | Belgium     | 2013 | 64.3 (57.2-70.7) | 165 | 64.3 (57.0-71.5) | 55.0 (47.6-62.1) | 167 | 55.0 (47.3-62.9) |
|  |      | Croatia     | 2013 | 68.9 (61.0-75.9) | 130 | 68.9 (60.8-76.9) | 60.1 (51.5-68.2) | 121 | 60.1 (51.2-68.6) |
|  |      | Cyprus      | 2013 | 55.6 (47.9-63.2) | 151 | 55.6 (47.7-63.6) | 46.0 (38.5-53.9) | 142 | 46.0 (38.0-54.2) |
|  |      | Czechia     | 2013 | 68.9 (61.2-75.8) | 136 | 68.9 (61.0-76.5) | 60.1 (51.7-68.0) | 128 | 60.1 (51.6-68.8) |
|  |      | Denmark     | 2013 | 71.5 (65.0-77.3) | 182 | 71.5 (64.8-78.0) | 63.0 (55.8-69.8) | 162 | 63.0 (55.6-70.4) |
|  |      | Estonia     | 2013 | 68.0 (60.2-74.9) | 135 | 68.0 (60.0-75.6) | 59.1 (50.7-67.0) | 125 | 59.1 (50.4-68.0) |
|  |      | Finland     | 2013 | 83.4 (79.0-87.1) | 266 | 83.4 (79.0-87.6) | 77.4 (71.9-82.1) | 216 | 77.4 (71.8-82.9) |
|  |      | France      | 2013 | 70.7 (64.1-76.5) | 175 | 70.7 (64.0-77.1) | 62.1 (54.8-68.9) | 163 | 62.1 (54.6-69.3) |
|  |      | Germany     | 2016 | 57.8 (50.8-64.5) | 178 | 57.8 (50.6-65.2) | 48.2 (41.2-55.3) | 180 | 48.2 (41.1-55.6) |
|  |      | Greece      | 2013 | 62.3 (55.1-69.1) | 171 | 62.3 (55.0-69.6) | 52.9 (45.5-60.3) | 160 | 52.9 (45.0-60.6) |
|  |      | Hungary     | 2013 | 61.5 (53.2-69.1) | 123 | 61.5 (52.9-69.9) | 52.1 (43.6-60.3) | 125 | 52.1 (43.2-60.8) |
|  |      | Ireland     | 2015 | 67.3 (60.5-73.5) | 174 | 67.3 (60.3-74.1) | 58.3 (51.0-65.3) | 171 | 58.3 (50.9-65.5) |
|  |      | Italy       | 2013 | 58.6 (51.2-65.7) | 161 | 58.6 (50.9-65.8) | 49.0 (41.6-56.6) | 160 | 49.0 (41.3-56.9) |
|  |      | Latvia      | 2013 | 70.5 (62.7-77.2) | 128 | 70.5 (62.5-78.1) | 61.9 (53.3-69.7) | 117 | 61.9 (53.0-70.9) |
|  |      | Lithuania   | 2013 | 73.5 (66.4-79.5) | 142 | 73.5 (66.2-80.3) | 65.3 (57.3-72.5) | 128 | 65.4 (57.0-73.4) |
|  |      | Luxembourg  | 2013 | 71.6 (65.1-77.3) | 183 | 71.6 (65.0-78.1) | 63.2 (55.9-69.8) | 167 | 63.1 (55.7-70.1) |
|  |      | Malta       | 2013 | 58.3 (49.7-66.4) | 125 | 58.3 (49.6-67.2) | 48.7 (40.2-57.3) | 123 | 48.7 (39.8-57.7) |
|  |      | Netherlands | 2013 | 72.8 (66.5-78.4) | 197 | 72.8 (66.5-78.7) | 64.5 (57.4-71.2) | 166 | 64.5 (57.2-71.7) |
|  |      | Norway      | 2014 | 68.3 (61.3-74.6) | 162 | 68.3 (61.1-75.3) | 59.4 (51.9-66.6) | 155 | 59.4 (51.6-67.1) |
|  |      | Poland      | 2013 | 67.5 (59.5-74.7) | 125 | 67.5 (59.2-75.2) | 58.5 (50.0-66.8) | 119 | 58.5 (49.6-67.2) |
|  |      | Portugal    | 2013 | 56.6 (47.8-65.0) | 114 | 56.6 (47.4-65.8) | 47.0 (38.4-55.8) | 112 | 47.0 (37.5-56.3) |
|  |      | Slovakia    | 2013 | 65.1 (57.0-72.4) | 127 | 65.1 (56.7-73.2) | 55.9 (47.4-64.1) | 125 | 55.9 (47.2-64.8) |
|  |      | Slovenia    | 2013 | 67.8 (59.9-74.8) | 129 | 67.8 (59.7-76.0) | 58.9 (50.4-66.9) | 120 | 58.9 (50.0-67.5) |
|  |      | Spain       | 2013 | 73.2 (66.8-78.8) | 180 | 73.2 (66.7-79.4) | 65.0 (57.8-71.6) | 163 | 65.0 (57.7-72.4) |
|  |      | Sweden      | 2013 | 76.9 (71.1-81.8) | 200 | 76.9 (71.0-82.5) | 69.4 (62.6-75.3) | 173 | 69.3 (62.4-76.3) |
|  |      | Switzerland | 2012 | 76.3 (69.7-81.8) | 158 | 76.3 (69.6-82.9) | 68.6 (61.0-75.3) | 135 | 68.6 (60.7-76.3) |

|                 |              |                        |      |                  |     |                  |                  |     |                  |
|-----------------|--------------|------------------------|------|------------------|-----|------------------|------------------|-----|------------------|
|                 |              | United Kingdom         | 2013 | 64.1 (57.1-70.6) | 174 | 64.1 (56.9-71.3) | 54.8 (47.5-62.0) | 170 | 54.8 (47.1-62.4) |
|                 | Upper-middle |                        |      |                  |     |                  |                  |     |                  |
|                 |              | Armenia                | 2016 | 77.4 (69.5-83.6) | 104 | 77.4 (69.2-85.6) | 70.0 (60.8-77.6) | 91  | 69.9 (60.4-79.1) |
|                 |              | Belarus                | 2016 | 85.9 (80.5-90.0) | 153 | 85.9 (80.4-91.5) | 80.6 (73.7-86.0) | 125 | 80.5 (73.6-87.2) |
|                 |              | Bosnia and Herzegovina | 2003 | 74.5 (66.1-81.5) | 103 | 74.5 (66.0-82.5) | 66.5 (57.0-75.0) | 90  | 66.5 (56.7-75.6) |
|                 |              | Bulgaria               | 2013 | 61.4 (52.7-69.4) | 120 | 61.4 (52.5-70.0) | 52.0 (43.1-60.7) | 115 | 52.0 (42.6-60.9) |
|                 |              | Kazakhstan             | 2003 | 72.5 (63.2-80.2) | 86  | 72.5 (62.8-81.4) | 64.2 (53.9-73.4) | 75  | 64.2 (53.3-74.7) |
|                 |              | Romania                | 2013 | 64.6 (56.3-72.2) | 118 | 64.6 (55.9-72.9) | 55.4 (46.7-63.8) | 121 | 55.4 (46.3-64.5) |
|                 |              | Russian Federation     | 2008 | 82.9 (78.2-87.6) | 216 | 82.9 (77.8-88.0) | 76.7 (70.9-82.8) | 167 | 76.7 (70.1-83.2) |
|                 |              | Serbia                 | 2006 | 60.5 (51.2-69.2) | 102 | 60.5 (51.0-69.6) | 51.0 (41.6-60.4) | 100 | 51.0 (41.0-61.0) |
|                 |              | Turkey                 | 2005 | 69.4 (61.2-76.7) | 115 | 69.4 (60.9-77.4) | 60.7 (51.7-69.1) | 109 | 60.7 (51.4-69.7) |
|                 | Lower-middle |                        |      |                  |     |                  |                  |     |                  |
|                 |              | Georgia                | 2016 | 82.0 (75.4-87.2) | 121 | 82.0 (75.2-88.4) | 75.6 (67.6-82.2) | 104 | 75.6 (67.3-83.7) |
|                 |              | Kyrgyzstan             | 2013 | 86.1 (79.5-90.9) | 107 | 86.1 (79.4-92.5) | 80.8 (72.5-87.2) | 79  | 80.8 (72.2-88.6) |
|                 |              | Republic of Moldova    | 2013 | 88.5 (84.0-91.9) | 193 | 88.5 (83.9-92.8) | 84.0 (78.1-88.5) | 150 | 84.0 (78.0-89.3) |
|                 |              | Ukraine                | 2003 | 80.4 (73.6-85.8) | 128 | 80.4 (73.4-86.7) | 73.6 (65.5-80.4) | 112 | 73.6 (65.2-81.3) |
|                 |              | Uzbekistan             | 2014 | 80.9 (73.3-86.8) | 101 | 80.9 (73.3-88.1) | 74.2 (65.1-81.7) | 85  | 74.2 (64.7-83.5) |
|                 | Low          |                        |      |                  |     |                  |                  |     |                  |
|                 |              | Tajikistan             | 2016 | 70.7 (61.2-78.8) | 87  | 70.7 (60.9-80.5) | 62.1 (51.7-71.6) | 78  | 62.1 (51.3-73.1) |
| South-East Asia |              |                        |      |                  |     |                  |                  |     |                  |
|                 | Upper-middle |                        |      |                  |     |                  |                  |     |                  |
|                 |              | Maldives               | 2011 | 69.7 (59.9-78.0) | 79  | 69.7 (59.5-79.8) | 61.0 (50.4-70.7) | 76  | 61.0 (50.0-71.1) |
|                 |              | Thailand               | 2016 | 75.4 (67.7-81.8) | 117 | 75.4 (67.5-82.9) | 67.6 (58.8-75.3) | 106 | 67.6 (58.5-76.4) |
|                 | Lower-middle |                        |      |                  |     |                  |                  |     |                  |
|                 |              | Bangladesh             | 2009 | 72.2 (60.9-83.6) | 47  | 72.2 (59.6-85.1) | 63.8 (51.4-77.6) | 39  | 63.9 (48.7-79.5) |

|                 |              |                   |      |                  |     |                  |                  |     |                  |
|-----------------|--------------|-------------------|------|------------------|-----|------------------|------------------|-----|------------------|
|                 |              | Bhutan            | 2014 | 77.0 (72.5-81.6) | 292 | 77.0 (72.3-81.9) | 69.5 (64.2-75.1) | 239 | 69.5 (63.6-75.3) |
|                 |              | India             | 2014 | 66.0 (52.3-77.7) | 41  | 66.0 (51.2-80.5) | 56.9 (42.7-70.3) | 41  | 56.9 (41.5-70.7) |
|                 |              | Indonesia         | 2006 | 77.4 (69.1-84.0) | 93  | 77.4 (68.8-86.0) | 70.0 (60.3-78.1) | 85  | 70.0 (60.0-80.0) |
|                 |              | Myanmar           | 2014 | 89.3 (85.0-92.5) | 200 | 89.3 (85.0-93.5) | 85.0 (79.4-89.3) | 150 | 85.0 (79.3-90.7) |
|                 |              | Sri Lanka         | 2014 | 71.1 (62.1-78.7) | 94  | 71.1 (61.7-79.8) | 62.6 (52.7-71.5) | 88  | 62.6 (52.3-72.7) |
|                 |              | Timor-Leste       | 2014 | 82.2 (75.0-87.7) | 108 | 82.2 (75.0-88.9) | 75.8 (67.1-82.9) | 91  | 75.9 (67.0-84.6) |
|                 | Low          |                   |      |                  |     |                  |                  |     |                  |
|                 |              | Nepal             | 2013 | 86.6 (84.4-88.8) | 847 | 86.6 (84.3-88.9) | 81.5 (78.6-84.4) | 644 | 81.5 (78.4-84.5) |
| Western Pacific |              |                   |      |                  |     |                  |                  |     |                  |
|                 | High         |                   |      |                  |     |                  |                  |     |                  |
|                 |              | Australia         | 2003 | 69.6 (62.1-76.3) | 139 | 69.6 (61.9-77.0) | 60.9 (52.7-68.6) | 128 | 60.9 (52.3-69.5) |
|                 |              | Brunei Darussalam | 2015 | 72.7 (61.7-81.5) | 62  | 72.7 (61.3-83.9) | 64.4 (52.3-75.0) | 56  | 64.4 (51.8-76.8) |
|                 |              | French Polynesia  | 2010 | 82.1 (75.6-87.2) | 135 | 82.1 (75.6-88.2) | 75.7 (67.8-82.2) | 108 | 75.7 (67.6-83.3) |
|                 |              | Japan             | 2003 | 64.5 (46.2-79.5) | 27  | 64.5 (44.4-81.5) | 55.3 (36.9-72.5) | 26  | 55.3 (34.6-73.1) |
|                 |              | New Zealand       | 2015 | 57.6 (50.2-64.7) | 164 | 57.6 (50.0-65.2) | 48.0 (40.7-55.5) | 165 | 48.0 (40.6-55.8) |
|                 |              | Palau             | 2016 | 59.1 (48.7-68.9) | 79  | 59.1 (48.1-69.6) | 49.6 (39.2-60.1) | 79  | 49.5 (38.0-60.8) |
|                 |              | Republic of Korea | 2013 | 64.6 (47.1-79.1) | 26  | 64.6 (46.2-80.8) | 55.4 (37.7-72.0) | 28  | 55.4 (35.7-75.0) |
|                 |              | Singapore         | 2013 | 63.5 (45.7-78.3) | 25  | 63.5 (44.0-80.0) | 54.2 (36.4-71.0) | 26  | 54.2 (34.6-73.1) |
|                 | Upper-middle |                   |      |                  |     |                  |                  |     |                  |
|                 |              | American Samoa    | 2004 | 46.6 (35.0-58.6) | 64  | 46.6 (34.4-59.4) | 37.2 (26.8-49.0) | 63  | 37.2 (25.4-49.2) |
|                 |              | China             | 2013 | 85.9 (80.6-89.9) | 164 | 85.9 (80.5-90.9) | 80.6 (73.9-85.8) | 133 | 80.5 (73.7-87.2) |
|                 |              | Cook Islands      | 2012 | 81.5 (75.1-86.7) | 140 | 81.5 (75.0-87.9) | 75.0 (67.2-81.6) | 112 | 75.0 (67.0-83.0) |
|                 |              | Fiji              | 2011 | 82.6 (76.4-87.5) | 139 | 82.6 (76.3-88.5) | 76.3 (68.8-82.6) | 118 | 76.4 (68.6-83.9) |
|                 |              | Malaysia          | 2015 | 61.2 (51.4-70.3) | 90  | 61.2 (51.1-71.1) | 51.7 (41.8-61.7) | 90  | 51.7 (41.1-62.2) |
|                 |              | Marshall Islands  | 2002 | 56.5 (46.3-66.2) | 83  | 56.5 (45.8-67.5) | 46.9 (37.0-57.1) | 85  | 46.9 (36.5-57.7) |
|                 |              | Nauru             | 2015 | 57.9 (46.7-68.3) | 75  | 57.9 (46.7-69.3) | 48.3 (37.3-59.4) | 68  | 48.3 (36.8-60.3) |

|  |              |                                  |      |                  |     |                  |                  |     |                  |
|--|--------------|----------------------------------|------|------------------|-----|------------------|------------------|-----|------------------|
|  |              | Samoa                            | 2013 | 87.4 (82.3-91.3) | 163 | 87.4 (82.2-92.0) | 82.5 (76.0-87.7) | 124 | 82.5 (75.8-88.7) |
|  |              | Tonga                            | 2011 | 82.6 (76.4-87.6) | 139 | 82.6 (76.3-88.5) | 76.3 (68.8-82.8) | 118 | 76.3 (68.6-83.9) |
|  |              | Tuvalu                           | 2015 | 72.7 (64.6-79.5) | 112 | 72.7 (64.3-80.4) | 64.4 (55.4-72.5) | 100 | 64.4 (55.0-74.0) |
|  | Lower-middle |                                  |      |                  |     |                  |                  |     |                  |
|  |              | Cambodia                         | 2010 | 89.5 (84.3-93.1) | 133 | 89.5 (84.2-94.7) | 85.3 (78.5-90.2) | 106 | 85.3 (78.3-91.5) |
|  |              | Federated States of Micronesia   | 2016 | 63.4 (54.0-71.8) | 95  | 63.4 (53.7-72.6) | 54.1 (44.4-63.4) | 98  | 54.1 (43.9-64.3) |
|  |              | Kiribati                         | 2004 | 59.6 (49.8-68.8) | 91  | 59.6 (49.5-69.2) | 50.1 (40.3-60.0) | 91  | 50.1 (39.6-60.4) |
|  |              | Lao People's Democratic Republic | 2013 | 83.7 (79.7-87.7) | 291 | 83.7 (79.4-88.0) | 77.7 (72.7-82.9) | 221 | 77.7 (72.0-83.3) |
|  |              | Mongolia                         | 2013 | 81.4 (75.6-86.1) | 176 | 81.4 (75.6-86.9) | 74.8 (67.8-80.8) | 142 | 74.9 (67.6-81.7) |
|  |              | Niue                             | 2011 | 93.1 (90.1-95.2) | 272 | 93.1 (90.1-96.0) | 90.2 (86.1-93.1) | 201 | 90.2 (86.1-94.0) |
|  |              | Papua New Guinea                 | 2007 | 85.2 (78.1-90.3) | 95  | 85.2 (77.9-91.6) | 79.7 (70.8-86.4) | 78  | 79.7 (70.5-88.5) |
|  |              | Philippines                      | 2015 | 60.3 (51.4-68.7) | 106 | 60.3 (50.9-69.8) | 50.8 (41.8-59.9) | 106 | 50.8 (41.5-60.4) |
|  |              | Solomon Islands                  | 2015 | 81.8 (75.2-87.0) | 133 | 81.8 (75.2-88.0) | 75.3 (67.3-82.0) | 113 | 75.3 (67.3-83.2) |
|  |              | Tokelau                          | 2014 | 88.9 (83.9-92.5) | 155 | 88.9 (83.9-93.6) | 84.5 (78.0-89.3) | 118 | 84.5 (78.0-90.7) |
|  |              | Vanuatu                          | 2011 | 92.0 (88.4-94.6) | 215 | 92.0 (88.4-95.4) | 88.7 (83.8-92.3) | 166 | 88.7 (83.7-93.4) |
|  |              | Viet Nam                         | 2015 | 74.6 (66.9-81.1) | 120 | 74.6 (66.7-82.5) | 66.6 (57.9-74.5) | 106 | 66.6 (57.6-75.5) |

## Appendix 9. Population and mortality data

Mortality data obtained from

<https://population.un.org/wpp/Download/Archive/Standard/> (2017 Revision)

Population data obtained from

[https://population.un.org/wpp/Download/Files/1\\_Indicators%20\(Standard\)/EXCEL\\_FILES/1\\_Population/WPP2019\\_POP\\_F01\\_1\\_TOTAL\\_POPULATION\\_BOTH\\_SEXES.xlsx](https://population.un.org/wpp/Download/Files/1_Indicators%20(Standard)/EXCEL_FILES/1_Population/WPP2019_POP_F01_1_TOTAL_POPULATION_BOTH_SEXES.xlsx)

Total world population (2015): 7,379,797,139 (7.4 billion)

Population (2015) for the 168 countries with physical activity data to be included in the present study: 7,022,019,600 (7.0 billion; 95.2% of the world population)

Population (2015) for the 14 countries for which there were no mortality data: 527,820 (<0.01% of total world population). We imputed mortality data for these countries by using the median ratio of deaths between the ages of 40-74 years to total population of countries in the same WHO region and income group. We multiplied this median value by the population of the country for which there was no mortality data. These 14 countries were:

American Samoa

Andorra

Bermuda

British Virgin Islands

Cayman Islands

Cook Islands

Dominica

Marshall Islands

Nauru

Niue

Palau

Saint Kitts and Nevis

Tokelau

Tuvalu

## Appendix 10: derivation of 'adjusted' Prevented Fraction for the Population formula for non-zero counterfactuals

Prevented Fraction for the Population is abbreviated to PFP. The denotation of ' indicates a counterfactual.

The Potential Impact Fraction formula relates closely to that of the Population Attributable Fraction:

$$\text{Population Attributable Fraction} = \frac{I_p - I_u}{I_p} \quad (\text{A})$$

*Dictionary of Epidemiology*

$$\text{Potential Impact Fraction} = \frac{I_p - I_{p'}}{I_p} \quad (\text{B})$$

*Morgenstern and Bursic 1982; Benichou 2001*

Note: these two formulae define the exposure as harmful and unexposure as protective.

The Potential Impact Fraction is an extension of the Population Attributable Fraction formula that replaces the incidence rate in the unexposed with a counterfactual incidence rate.

The same can be done for the PFP.

$$PFP = \frac{I_u - I_p}{I_u} \quad (\text{C})$$

$$\text{'unadjusted' PFP for a non - zero counterfactual} = \frac{I_{p'} - I_p}{I_{p'}} \quad (\text{D})$$

The proportion of active in the counterfactual population is represented by  $P_{e'}$ . Formula A can be rewritten as:

*'unadjusted' PFP for a non - zero counterfactual =*

$$\frac{((1 - P_{e'}) \cdot I_u + P_{e'} \cdot I_u \cdot RR) - ((1 - P_e) \cdot I_u + P_e \cdot I_u \cdot RR)}{((1 - P_{e'}) \cdot I_u + P_{e'} \cdot I_u \cdot RR)} \quad (\text{E})$$

This can be rearranged as:

$$\text{'unadjusted' PFP for a non - zero counterfactual} = \frac{(P_e - P_{e'})(1 - RR)}{1 - P_{e'}(1 - RR)} \quad (\text{F})$$

Formulae F and B both compare the difference in disease burden between two scenarios, and express that as a proportion of the scenario with the higher disease burden. Therefore, they can be considered equivalent but differing in terms of exposure definition (harmful or protective).



To extend this formula to use  $P_d$  rather than  $P_e$ , substitute in a variant of Formula 4 ( $P_e$  defined in terms of  $P_d$  and  $RR$ ):

$$P_e = \frac{P_d}{(1-(1-P_d)(1-RR))} \quad (\text{a variant of Formula 4, see Appendix 4, p9})$$

$$'adjusted' PFP \text{ for a non - zero counterfactual} = \frac{\left( \frac{P_d}{(1-(1-P_d)(1-RR))} - \frac{P_{d'}}{(1-(1-P_{d'})(1-RR))} \right) (1-RR)}{1 - \frac{P_{d'}(1-RR)}{(1-(1-P_{d'})(1-RR))}} \quad (G)$$

The numerator of formula G can be rearranged:

$$'adjusted' PFP \text{ for a non - zero counterfactual} = \frac{\frac{P_d}{(1-(1-P_d)(1-RR))} - \frac{P_{d'}RR}{(1-(1-P_d)(1-RR))} - \frac{P_{d'}}{(1-(1-P_{d'})(1-RR))} + \frac{P_{d'}RR}{(1-(1-P_{d'})(1-RR))}}{1 - \frac{P_{d'}(1-RR)}{(1-(1-P_{d'})(1-RR))}} \quad (H)$$

Next, multiply the numerator by the denominator:

$$'adjusted' PFP \text{ for a non - zero counterfactual} = \left( \frac{P_d}{(1-(1-P_d)(1-RR))} - \frac{P_{d'}RR}{(1-(1-P_d)(1-RR))} - \frac{P_{d'}}{(1-(1-P_{d'})(1-RR))} + \frac{P_{d'}RR}{(1-(1-P_{d'})(1-RR))} \right) \cdot \frac{(1-(1-P_{d'})(1-RR))}{((1-(1-P_{d'})(1-RR))+P_{d'}RR-P_{d'})} \quad (I)$$

This can be expanded out and cancelled to:

$$'adjusted' PFP \text{ for a non - zero counterfactual} = \frac{P_{d'}(1-RR) \cdot (1-(1-P_{d'})(1-RR))}{(1-(1-P_d)(1-RR)) \cdot ((1-(1-P_{d'})(1-RR))+P_{d'}RR-P_{d'})} - \frac{P_{d'}(1-RR)}{((1-(1-P_{d'})(1-RR))+P_{d'}RR-P_{d'})} \quad (J)$$

Multiply out to get both fractions on the same denominator

$$'adjusted' PFP \text{ for a non - zero counterfactual} = \frac{P_{d'}(1-RR) \cdot (1-(1-P_{d'})(1-RR)) - P_{d'}(1-RR) \cdot (1-(1-P_d)(1-RR))}{(1-(1-P_d)(1-RR)) \cdot ((1-(1-P_{d'})(1-RR))+P_{d'}RR-P_{d'})} \quad (K)$$

The numerator of formula K expands and cancels to:

$$\text{Numerator}(K) =$$

$$(P_d - P_d \cdot RR) \cdot (P_{d'} + RR + P_{d'} \cdot RR) - (P_{d'} - P_{d'} \cdot RR) \cdot (P_d + RR + P_d \cdot RR) \quad (L)$$

$$\text{Numerator}(K) =$$

$$P_d \cdot P_{d'} + P_d \cdot RR + P_d \cdot P_{d'} \cdot RR - P_d \cdot P_{d'} \cdot RR - P_d RR^2 - P_d \cdot P_{d'} \cdot RR^2 - P_d \cdot P_{d'} - P_{d'} \cdot RR - P_d \cdot P_{d'} \cdot RR + P_d \cdot P_{d'} \cdot RR + P_{d'} RR^2 + P_d \cdot P_{d'} \cdot RR^2 \quad (M)$$

$$\text{Numerator}(K) = P_d \cdot RR - P_d RR^2 - P_{d'} \cdot RR + P_{d'} RR^2 \quad (N)$$

$$\text{Numerator}(K) = RR(P_d - P_d \cdot RR - P_{d'} + P_{d'} RR) \quad (O)$$

The denominator of formula K can be partially expanded out to:

$$\text{Denominator}(K) = (1 - (1 - P_d) \cdot (1 - RR)) \cdot (P_{d'} + RR - P_{d'} \cdot RR + P_{d'} \cdot RR - P_{d'}) \quad (P)$$

$$\text{Denominator}(K) = (1 - (1 - P_d) \cdot (1 - RR)) \cdot RR \quad (Q)$$

Together,

$$'adjusted' PFP \text{ for a non - zero counterfactual} = \frac{RR(P_d - P_{d'} \cdot RR - P_{d'} + P_{d'} RR)}{(1 - (1 - P_d) \cdot (1 - RR)) \cdot RR} \quad (R)$$

This cancels and simplifies to

$$'adjusted' PFP \text{ for a non - zero counterfactual} = \frac{(P_d - P_{d'}) \cdot (1 - RR)}{(1 - (1 - P_d) \cdot (1 - RR))} \quad (\text{Formula 5})$$

**Appendix 11. The adjusted Prevented Fractions for the Population for 168 countries, representing the percentage of premature mortality averted due to current physical activity levels, by World Health Organization region and World Bank Income Classification.**

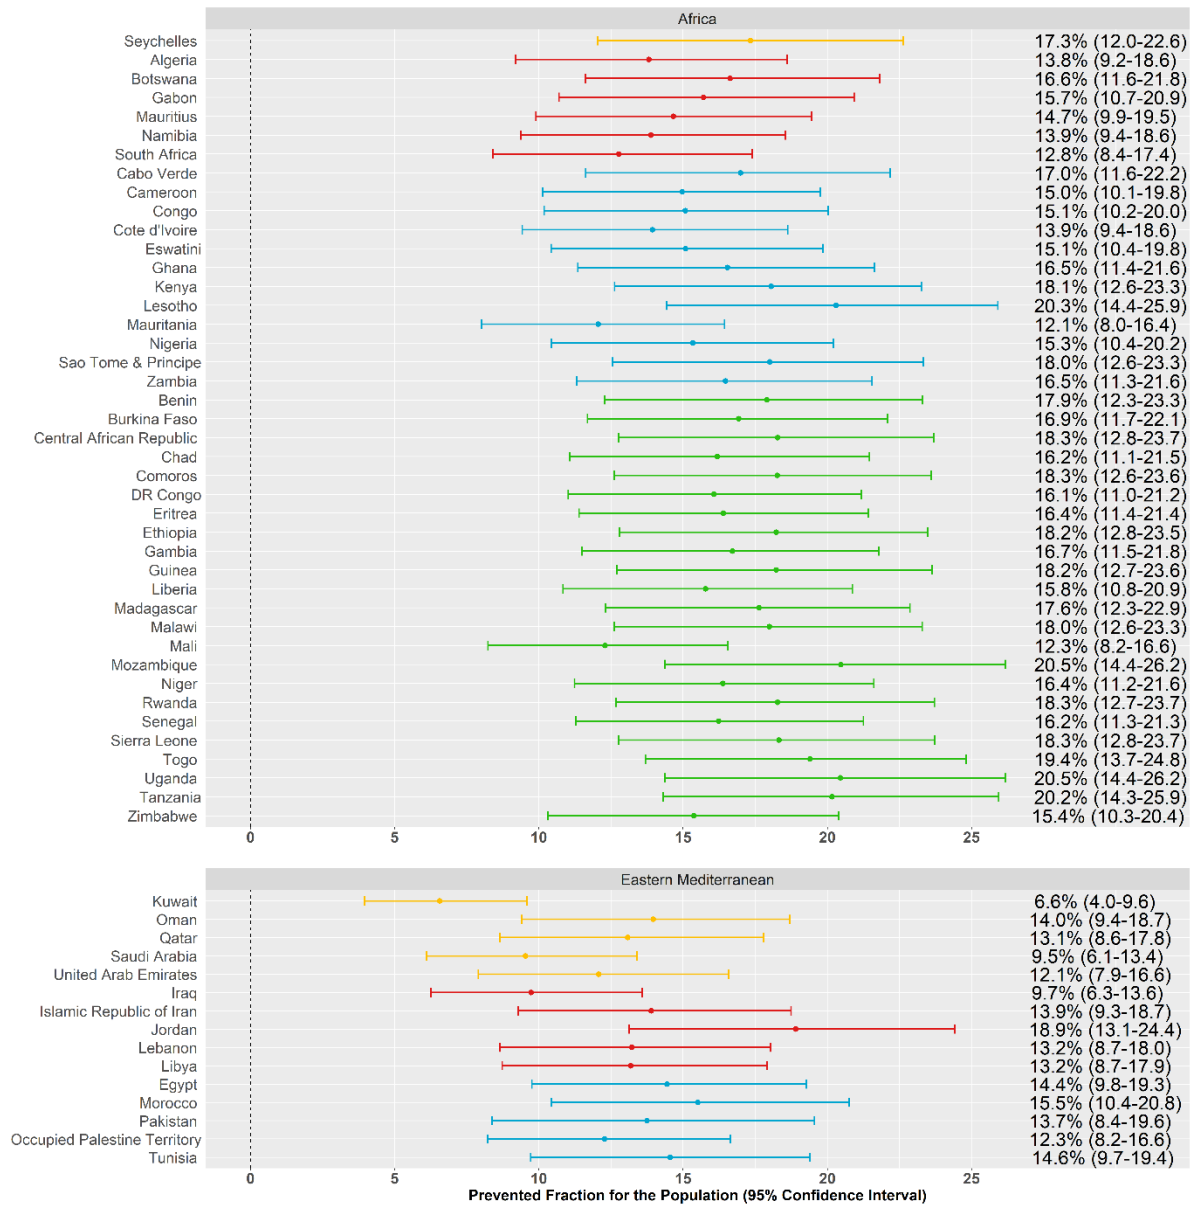

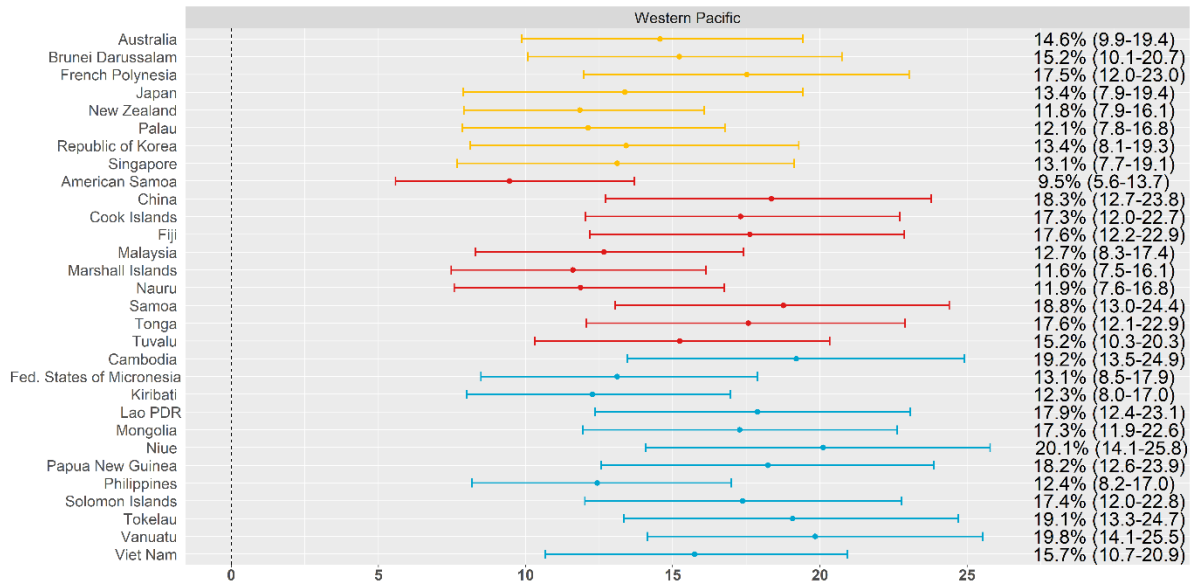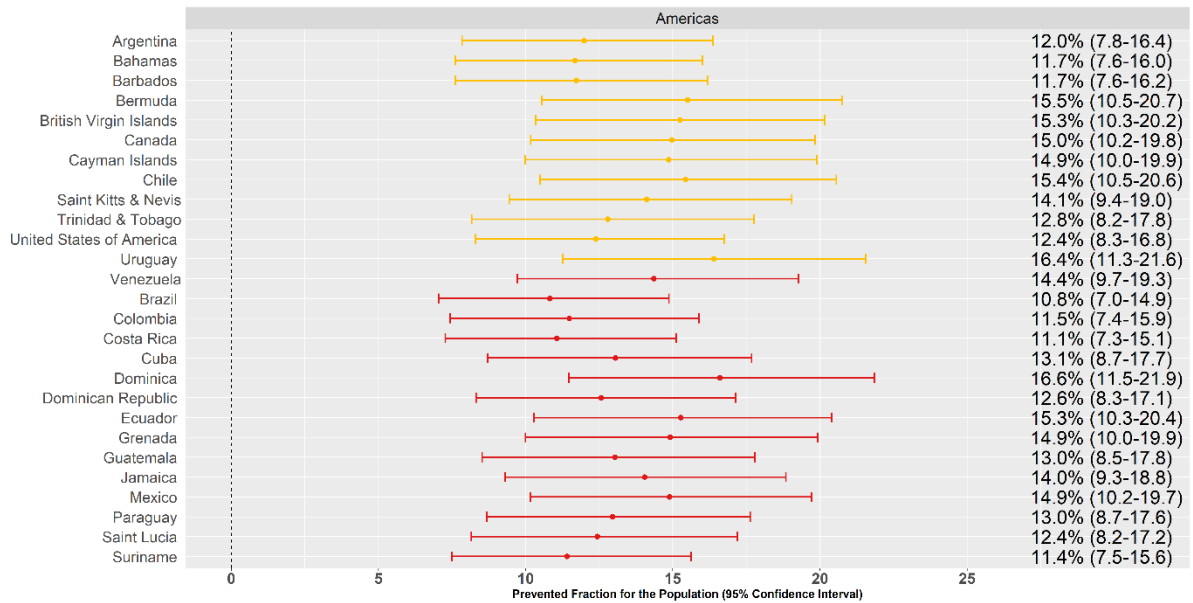

Prevented Fraction for the Population (95% Confidence Interval)

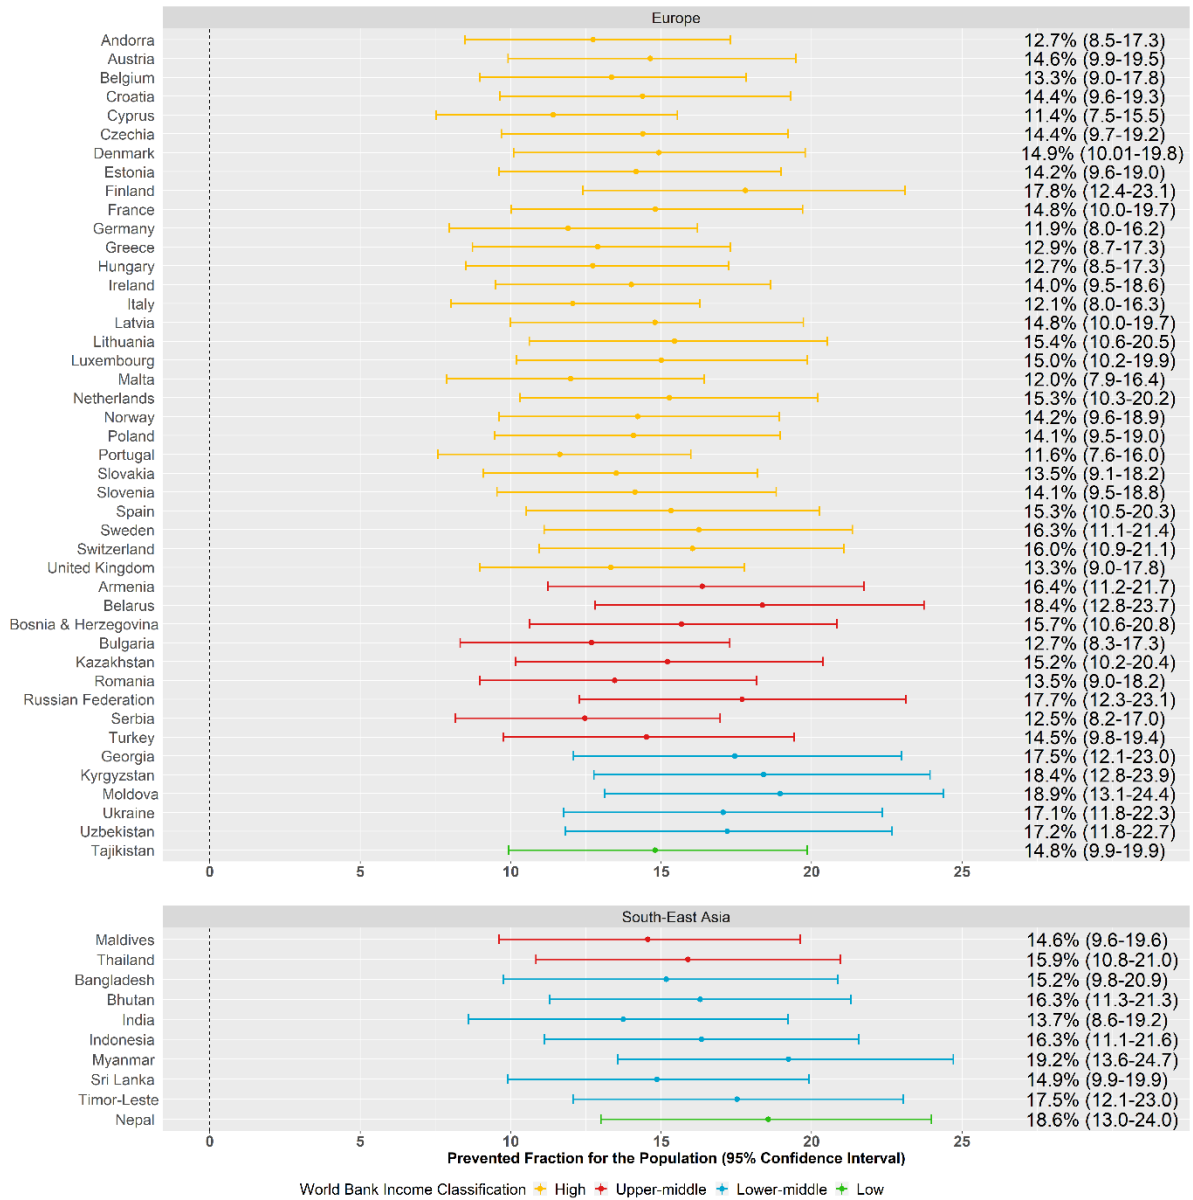

**Appendix 12. The prevalence of activity, the Prevented Fractions for the Population, and the corresponding number of deaths averted for 168 countries.**

| World Health Organization region | World Bank income group classification | Country       | Prevalence of activity (95% confidence intervals) | Prevalence of activity amongst those that died (95% confidence intervals) | Prevented Fractions for the Population (95% confidence intervals) |                                                               |                                                                       |                                                              |                                                                  |
|----------------------------------|----------------------------------------|---------------|---------------------------------------------------|---------------------------------------------------------------------------|-------------------------------------------------------------------|---------------------------------------------------------------|-----------------------------------------------------------------------|--------------------------------------------------------------|------------------------------------------------------------------|
|                                  |                                        |               |                                                   |                                                                           | Main adjusted estimate (0% activity counterfactual) <sup>a</sup>  | Unadjusted estimate (0% activity counterfactual) <sup>b</sup> | Partially adjusted estimate (0% activity counterfactual) <sup>c</sup> | Adjusted estimate (54.3% active counterfactual) <sup>d</sup> | Number of deaths averted between ages of 40-74 years (thousands) |
| Africa                           |                                        |               |                                                   |                                                                           |                                                                   |                                                               |                                                                       |                                                              |                                                                  |
|                                  | High                                   |               |                                                   |                                                                           |                                                                   |                                                               |                                                                       |                                                              |                                                                  |
|                                  |                                        | Seychelles    | 81.2 (74.8-86.2)                                  | 74.6 (66.9-80.9)                                                          | 17.3 (12.0-22.6)                                                  | 26.0 (21.3-30.7)                                              | 17.7 (12.5-22.9)                                                      | 6.9 (4.3-9.7)                                                | 0.1                                                              |
|                                  | Upper-middle                           |               |                                                   |                                                                           |                                                                   |                                                               |                                                                       |                                                              |                                                                  |
|                                  |                                        | Algeria       | 66.4 (57.3-74.5)                                  | 57.3 (47.7-66.5)                                                          | 13.8 (9.2-18.6)                                                   | 21.2 (16.7-25.9)                                              | 14.5 (10.0-19.1)                                                      | 3.0 (0.6-5.7)                                                | 10.6                                                             |
|                                  |                                        | Botswana      | 78.3 (72.5-83.1)                                  | 71.0 (64.2-77.0)                                                          | 16.6 (11.6-21.8)                                                  | 25.0 (20.4-29.6)                                              | 17.0 (12.0-21.9)                                                      | 6.2 (3.9-8.7)                                                | 1.4                                                              |
|                                  |                                        | Gabon         | 74.7 (66.5-81.5)                                  | 66.7 (57.4-75.0)                                                          | 15.7 (10.7-20.9)                                                  | 23.9 (19.1-28.8)                                              | 16.3 (11.4-21.3)                                                      | 5.2 (2.7-8.0)                                                | 0.9                                                              |
|                                  |                                        | Mauritius     | 70.2 (62.2-77.2)                                  | 61.6 (52.8-69.7)                                                          | 14.7 (9.9-19.5)                                                   | 22.4 (18.0-27.1)                                              | 15.3 (10.6-20.0)                                                      | 4.0 (1.8-6.5)                                                | 0.9                                                              |
|                                  |                                        | Namibia       | 66.6 (58.9-73.6)                                  | 57.5 (49.3-65.5)                                                          | 13.9 (9.4-18.6)                                                   | 21.3 (17.0-25.7)                                              | 14.5 (10.1-19.1)                                                      | 3.1 (1.0-5.5)                                                | 1.3                                                              |
|                                  |                                        | South Africa  | 61.8 (53.2-69.9)                                  | 52.4 (43.6-61.2)                                                          | 12.8 (8.4-17.4)                                                   | 19.8 (15.6-24.3)                                              | 13.5 (9.4-17.8)                                                       | 1.9 (-0.3-4.2)                                               | 42.7                                                             |
|                                  | Lower-middle                           |               |                                                   |                                                                           |                                                                   |                                                               |                                                                       |                                                              |                                                                  |
|                                  |                                        | Cabo Verde    | 80.3 (74.7-85.0)                                  | 73.5 (66.7-79.4)                                                          | 17.0 (11.6-22.2)                                                  | 25.7 (21.1-30.2)                                              | 17.5 (12.3-22.5)                                                      | 6.7 (4.3-9.2)                                                | 0.2                                                              |
|                                  |                                        | Cameroon      | 71.5 (64.9-77.3)                                  | 63.0 (55.7-69.8)                                                          | 15.0 (10.1-19.8)                                                  | 22.8 (18.5-27.2)                                              | 15.6 (10.9-20.3)                                                      | 4.4 (2.3-6.7)                                                | 11.1                                                             |
|                                  |                                        | Congo         | 72.0 (64.5-78.4)                                  | 63.6 (55.3-71.2)                                                          | 15.1 (10.2-20.0)                                                  | 23.0 (18.6-27.6)                                              | 15.7 (11.0-20.5)                                                      | 4.5 (2.3-7.0)                                                | 2.2                                                              |
|                                  |                                        | Côte d'Ivoire | 66.9 (60.6-73.3)                                  | 57.9 (51.1-65.1)                                                          | 13.9 (9.4-18.6)                                                   | 21.4 (17.4-25.6)                                              | 14.6 (10.2-18.9)                                                      | 3.2 (1.3-5.3)                                                | 14.2                                                             |
|                                  |                                        | Eswatini      | 72.0 (67.1-76.9)                                  | 63.6 (58.1-69.4)                                                          | 15.1 (10.4-19.8)                                                  | 23.0 (18.9-27.1)                                              | 15.7 (11.0-20.2)                                                      | 4.5 (2.7-6.5)                                                | 0.8                                                              |
|                                  |                                        | Ghana         | 78.2 (73.7-82.7)                                  | 70.9 (65.6-76.5)                                                          | 16.5 (11.4-21.6)                                                  | 25.0 (20.5-29.3)                                              | 17.1 (12.1-21.9)                                                      | 6.1 (4.0-8.4)                                                | 14.8                                                             |
|                                  |                                        | Kenya         | 84.6 (82.2-86.9)                                  | 78.9 (75.8-81.8)                                                          | 18.1 (12.6-23.3)                                                  | 27.0 (22.3-31.5)                                              | 18.5 (13.1-23.6)                                                      | 7.8 (5.4-10.2)                                               | 18.0                                                             |
|                                  |                                        | Lesotho       | 93.7 (91.4-95.5)                                  | 91.0 (87.8-93.5)                                                          | 20.3 (14.4-25.9)                                                  | 29.9 (24.6-34.9)                                              | 20.5 (14.5-26.1)                                                      | 10.3 (7.2-13.3)                                              | 2.7                                                              |
|                                  |                                        | Mauritania    | 58.7 (50.8-66.6)                                  | 49.1 (41.2-57.5)                                                          | 12.1 (8.0-16.4)                                                   | 18.8 (14.7-22.9)                                              | 12.8 (8.9-16.9)                                                       | 1.1 (-1.0-3.3)                                               | 1.2                                                              |



|  |              |                                  |                  |                  |                  |                  |                  |                 |                  |
|--|--------------|----------------------------------|------------------|------------------|------------------|------------------|------------------|-----------------|------------------|
|  | High         |                                  |                  |                  |                  |                  |                  |                 |                  |
|  |              | Argentina                        | 58.4 (50.0-66.4) | 48.8 (40.5-57.3) | 12.0 (7.8-16.4)  | 18.6 (14.6-22.8) | 12.7 (8.8-16.8)  | 1.0 (-1.2-3.2)  | 17.5             |
|  |              | Bahamas                          | 56.7 (48.1-65.1) | 47.1 (38.7-55.9) | 11.7 (7.6-16.0)  | 18.1 (14.0-22.4) | 12.4 (8.5-16.5)  | 0.6 (-1.7-2.8)  | 0.2              |
|  |              | Barbados                         | 57.1 (48.3-65.9) | 47.5 (38.8-56.8) | 11.7 (7.6-16.2)  | 18.2 (14.1-22.6) | 12.5 (8.5-16.6)  | 0.7 (-1.7-3.1)  | 0.1              |
|  |              | Bermuda                          | 73.8 (65.4-80.8) | 65.7 (56.2-74.1) | 15.5 (10.5-20.7) | 23.6 (18.9-28.4) | 16.2 (11.3-20.9) | 5.0 (2.4-7.8)   | 0.0 <sup>e</sup> |
|  |              | British Virgin Islands           | 72.6 (65.1-79.1) | 64.3 (55.9-72.0) | 15.3 (10.3-20.2) | 23.2 (18.6-27.9) | 15.8 (11.1-20.7) | 4.6 (2.4-7.1)   | 0.0 <sup>e</sup> |
|  |              | Canada                           | 71.4 (63.7-78.1) | 62.9 (54.4-70.8) | 15.0 (10.2-19.8) | 22.9 (18.4-27.5) | 15.6 (10.8-20.5) | 4.3 (2.1-6.9)   | 15.0             |
|  |              | Cayman Islands                   | 70.9 (62.5-78.1) | 62.4 (53.1-70.8) | 14.9 (10.0-19.9) | 22.7 (18.1-27.4) | 15.5 (10.7-20.2) | 4.2 (1.9-6.9)   | 0.0 <sup>e</sup> |
|  |              | Chile                            | 73.4 (66.4-80.4) | 65.2 (57.3-73.6) | 15.4 (10.5-20.6) | 23.5 (19.0-28.1) | 16.0 (11.2-20.7) | 4.9 (2.5-7.5)   | 8.4              |
|  |              | Saint Kitts and Nevis            | 67.8 (58.8-75.7) | 58.9 (49.2-67.9) | 14.1 (9.4-19.0)  | 21.7 (17.1-26.4) | 14.8 (10.2-19.4) | 3.4 (1.0-6.0)   | 0.0 <sup>e</sup> |
|  |              | Trinidad and Tobago              | 61.8 (50.4-72.2) | 52.4 (40.9-63.8) | 12.8 (8.2-17.8)  | 19.8 (14.9-24.8) | 13.5 (9.1-18.1)  | 1.9 (-1.2-4.9)  | 1.0              |
|  |              | United States of America         | 60.0 (52.7-67.0) | 50.5 (43.1-58.0) | 12.4 (8.3-16.8)  | 19.2 (15.3-23.3) | 13.1 (9.1-17.2)  | 1.4 (-0.4-3.4)  | 140.2            |
|  |              | Uruguay                          | 77.6 (71.0-83.1) | 70.2 (62.5-77.0) | 16.4 (11.3-21.6) | 24.8 (20.2-29.5) | 17.0 (12.0-22.0) | 6.0 (3.6-8.6)   | 2.3              |
|  | Upper-middle |                                  |                  |                  |                  |                  |                  |                 |                  |
|  |              | Bolivarian Republic of Venezuela | 68.6 (60.0-76.0) | 59.8 (50.5-68.3) | 14.4 (9.7-19.3)  | 22.0 (17.6-26.6) | 14.9 (10.4-19.6) | 3.6 (1.3-6.3)   | 13.2             |
|  |              | Brazil                           | 53.0 (44.7-61.1) | 43.4 (35.5-51.6) | 10.8 (7.0-14.9)  | 16.9 (13.1-20.9) | 11.6 (8.0-15.5)  | -0.3 (-2.5-1.8) | 71.6             |
|  |              | Colombia                         | 56.0 (47.3-64.6) | 46.4 (37.9-55.4) | 11.5 (7.4-15.9)  | 17.9 (13.9-22.1) | 12.2 (8.3-16.3)  | 0.4 (-2.0-2.8)  | 15.5             |
|  |              | Costa Rica                       | 53.9 (45.6-62.1) | 44.3 (36.3-52.7) | 11.1 (7.3-15.1)  | 17.2 (13.5-21.3) | 11.8 (8.0-15.7)  | -0.1 (-2.3-2.0) | 1.2              |
|  |              | Cuba                             | 63.1 (54.8-70.8) | 53.8 (45.2-62.2) | 13.1 (8.7-17.7)  | 20.1 (15.9-24.6) | 13.8 (9.6-18.1)  | 2.2 (0.0-4.5)   | 5.5              |
|  |              | Dominica                         | 78.4 (72.0-83.7) | 71.2 (63.6-77.7) | 16.6 (11.5-21.9) | 25.1 (20.5-29.7) | 17.1 (12.1-22.1) | 6.2 (3.8-8.8)   | 0.0 <sup>e</sup> |
|  |              | Dominican Republic               | 61.0 (52.3-69.1) | 51.5 (42.7-60.3) | 12.6 (8.3-17.1)  | 19.5 (15.3-24.0) | 13.3 (9.1-17.6)  | 1.7 (-0.6-4.0)  | 3.8              |
|  |              | Ecuador                          | 72.8 (65.4-80.3) | 64.5 (56.2-73.5) | 15.3 (10.3-20.4) | 23.2 (18.7-28.1) | 15.9 (11.1-20.7) | 4.7 (2.3-7.4)   | 5.3              |
|  |              | Grenada                          | 71.3 (62.8-78.6) | 62.8 (53.4-71.4) | 14.9 (10.0-19.9) | 22.8 (18.1-27.5) | 15.6 (10.8-20.5) | 4.3 (1.9-7.0)   | 0.1              |
|  |              | Guatemala                        | 62.9 (52.6-72.1) | 53.5 (43.0-63.7) | 13.0 (8.5-17.8)  | 20.1 (15.5-24.9) | 13.7 (9.4-18.2)  | 2.2 (-0.6-5.0)  | 3.7              |
|  |              | Jamaica                          | 67.4 (59.2-74.8) | 58.4 (49.7-66.9) | 14.0 (9.3-18.8)  | 21.5 (17.0-26.2) | 14.7 (10.3-19.2) | 3.3 (1.2-5.7)   | 1.1              |
|  |              | Mexico                           | 71.1 (64.4-77.0) | 62.6 (55.2-69.5) | 14.9 (10.2-19.7) | 22.7 (18.5-27.1) | 15.5 (10.8-20.1) | 4.2 (2.2-6.6)   | 41.3             |
|  |              | Paraguay                         | 62.6 (54.1-71.1) | 53.2 (44.5-62.6) | 13.0 (8.7-17.6)  | 20.0 (15.7-24.5) | 13.6 (9.4-18.0)  | 2.1 (-0.3-4.6)  | 2.1              |
|  |              | Saint Lucia                      | 60.2 (50.1-69.7) | 50.7 (40.6-61.0) | 12.4 (8.2-17.2)  | 19.3 (14.8-24.1) | 13.2 (8.9-17.6)  | 1.5 (-1.2-4.2)  | 0.1              |



|                       |              |                              |                  |                  |                  |                  |                  |                  |                  |
|-----------------------|--------------|------------------------------|------------------|------------------|------------------|------------------|------------------|------------------|------------------|
|                       |              | Suriname                     | 55.6 (47.3-63.6) | 46.0 (37.9-54.3) | 11.4 (7.5-15.6)  | 17.8 (13.9-21.9) | 12.2 (8.4-16.1)  | 0.3 (-1.9-2.5)   | 0.2              |
| Eastern Mediterranean |              |                              |                  |                  |                  |                  |                  |                  |                  |
|                       | High         |                              |                  |                  |                  |                  |                  |                  |                  |
|                       |              | Kuwait                       | 33.0 (25.7-41.4) | 25.1 (19.0-32.4) | 6.6 (4.0-9.6)    | 10.5 (7.5-14.0)  | 7.2 (4.6-10.1)   | -5.1 (-8.1--2.7) | 0.3              |
|                       |              | Oman                         | 67.1 (58.2-74.8) | 58.1 (48.6-66.9) | 14.0 (9.4-18.7)  | 21.5 (17.0-26.1) | 14.6 (10.1-19.3) | 3.2 (0.9-5.7)    | 0.7              |
|                       |              | Qatar                        | 63.2 (53.8-71.6) | 53.9 (44.2-63.2) | 13.1 (8.6-17.8)  | 20.2 (15.7-24.8) | 13.8 (9.4-18.4)  | 2.2 (-0.3-4.8)   | 0.2              |
|                       |              | Saudi Arabia                 | 46.9 (38.4-55.5) | 37.5 (29.8-45.9) | 9.5 (6.1-13.4)   | 15.0 (11.3-19.0) | 10.2 (6.9-13.7)  | -1.8 (-4.4-0.4)  | 5.1              |
|                       |              | United Arab Emirates         | 58.6 (50.1-67.2) | 49.0 (40.6-58.2) | 12.1 (7.9-16.6)  | 18.7 (14.6-23.1) | 12.8 (8.8-16.9)  | 1.1 (-1.3-3.5)   | 1.0              |
|                       | Upper-middle |                              |                  |                  |                  |                  |                  |                  |                  |
|                       |              | Iraq                         | 48.0 (40.2-55.9) | 38.6 (31.4-46.3) | 9.7 (6.3-13.6)   | 15.3 (11.8-19.1) | 10.5 (7.1-14.1)  | -1.6 (-3.8-0.5)  | 7.0              |
|                       |              | Islamic Republic of Iran     | 66.8 (58.6-74.1) | 57.8 (49.0-66.0) | 13.9 (9.3-18.7)  | 21.3 (16.9-26.0) | 14.6 (10.1-19.2) | 3.1 (0.9-5.7)    | 21.9             |
|                       |              | Jordan                       | 88.1 (83.6-91.6) | 83.4 (77.6-88.1) | 18.9 (13.1-24.4) | 28.2 (23.1-33.1) | 19.2 (13.7-24.6) | 8.8 (5.9-11.7)   | 3.2              |
|                       |              | Lebanon                      | 63.6 (54.6-71.7) | 54.3 (45.0-63.3) | 13.2 (8.7-18.0)  | 20.4 (15.9-25.0) | 13.9 (9.6-18.4)  | 2.3 (-0.1-5.0)   | 1.5              |
|                       |              | Libya                        | 63.6 (54.3-72.0) | 54.3 (44.7-63.6) | 13.2 (8.7-17.9)  | 20.3 (16.0-24.9) | 13.9 (9.6-18.3)  | 2.3 (-0.1-4.9)   | 2.0              |
|                       | Lower-middle |                              |                  |                  |                  |                  |                  |                  |                  |
|                       |              | Egypt                        | 69.0 (60.5-76.4) | 60.2 (51.0-68.8) | 14.4 (9.8-19.3)  | 22.1 (17.6-26.7) | 15.0 (10.5-19.7) | 3.7 (1.4-6.4)    | 44.6             |
|                       |              | Morocco                      | 73.8 (64.6-81.4) | 65.7 (55.4-74.8) | 15.5 (10.4-20.8) | 23.6 (18.7-28.7) | 16.1 (11.2-21.2) | 5.0 (2.3-8.0)    | 10.9             |
|                       |              | Pakistan                     | 66.3 (53.0-79.7) | 57.2 (43.4-72.7) | 13.7 (8.4-19.6)  | 21.2 (15.4-27.3) | 14.5 (9.4-19.9)  | 3.0 (-1.1-7.1)   | 70.9             |
|                       |              | Occupied Palestine Territory | 59.5 (51.0-67.5) | 50.0 (41.4-58.5) | 12.3 (8.2-16.6)  | 19.0 (14.8-23.3) | 13.0 (8.9-17.2)  | 1.3 (-0.8-3.6)   | 0.9              |
|                       |              | Tunisia                      | 69.6 (61.3-76.9) | 60.9 (51.8-69.4) | 14.6 (9.7-19.4)  | 22.2 (17.7-26.9) | 15.2 (10.5-19.9) | 3.9 (1.5-6.4)    | 4.9              |
| Europe                |              |                              |                  |                  |                  |                  |                  |                  |                  |
|                       | High         |                              |                  |                  |                  |                  |                  |                  |                  |
|                       |              | Andorra                      | 61.6 (53.4-69.2) | 52.2 (43.8-60.4) | 12.7 (8.5-17.3)  | 19.7 (15.5-24.0) | 13.5 (9.2-17.7)  | 1.8 (-0.3-4.1)   | 0.0 <sup>e</sup> |
|                       |              | Austria                      | 69.9 (63.2-75.9) | 61.2 (53.9-68.2) | 14.6 (9.9-19.5)  | 22.3 (18.1-26.7) | 15.3 (10.8-19.8) | 4.0 (2.0-6.2)    | 4.3              |
|                       |              | Belgium                      | 64.3 (57.2-70.7) | 55.0 (47.6-62.1) | 13.3 (9.0-17.8)  | 20.6 (16.4-24.8) | 14.0 (9.8-18.4)  | 2.5 (0.6-4.6)    | 4.9              |
|                       |              | Croatia                      | 68.9 (61.0-75.9) | 60.1 (51.5-68.2) | 14.4 (9.6-19.3)  | 22.0 (17.5-26.6) | 15.0 (10.4-19.7) | 3.7 (1.5-6.2)    | 3.3              |
|                       |              | Cyprus                       | 55.6 (47.9-63.2) | 46.0 (38.5-53.9) | 11.4 (7.5-15.5)  | 17.8 (13.9-21.9) | 12.1 (8.3-16.0)  | 0.3 (-1.8-2.5)   | 0.3              |

|  |              |                        |                  |                  |                  |                  |                  |                |      |
|--|--------------|------------------------|------------------|------------------|------------------|------------------|------------------|----------------|------|
|  |              | Czechia                | 68.9 (61.2-75.8) | 60.1 (51.7-68.0) | 14.4 (9.7-19.2)  | 22.0 (17.7-26.6) | 15.0 (10.5-19.6) | 3.7 (1.6-6.1)  | 7.3  |
|  |              | Denmark                | 71.5 (65.0-77.3) | 63.0 (55.8-69.8) | 14.9 (10.1-19.8) | 22.8 (18.4-27.2) | 15.6 (10.9-20.3) | 4.3 (2.3-6.7)  | 3.3  |
|  |              | Estonia                | 68.0 (60.2-74.9) | 59.1 (50.7-67.0) | 14.2 (9.6-19.0)  | 21.7 (17.3-26.2) | 14.8 (10.4-19.3) | 3.4 (1.3-5.9)  | 1.0  |
|  |              | Finland                | 83.4 (79.0-87.1) | 77.4 (71.9-82.1) | 17.8 (12.4-23.1) | 26.7 (21.9-31.3) | 18.2 (12.8-23.3) | 7.5 (5.0-10.1) | 3.7  |
|  |              | France                 | 70.7 (64.1-76.5) | 62.1 (54.8-68.9) | 14.8 (10.0-19.7) | 22.6 (18.2-27.0) | 15.4 (10.8-19.9) | 4.2 (2.2-6.5)  | 28.5 |
|  |              | Germany                | 57.8 (50.8-64.5) | 48.2 (41.2-55.3) | 11.9 (8.0-16.2)  | 18.5 (14.7-22.5) | 12.6 (8.7-16.5)  | 0.9 (-1.0-2.7) | 37.4 |
|  |              | Greece                 | 62.3 (55.1-69.1) | 52.9 (45.5-60.3) | 12.9 (8.7-17.3)  | 19.9 (16.0-24.0) | 13.6 (9.5-17.8)  | 2.0 (0.1-4.1)  | 4.6  |
|  |              | Hungary                | 61.5 (53.2-69.1) | 52.1 (43.6-60.3) | 12.7 (8.5-17.3)  | 19.7 (15.6-24.0) | 13.4 (9.3-17.7)  | 1.8 (-0.3-4.1) | 8.2  |
|  |              | Ireland                | 67.3 (60.5-73.5) | 58.3 (51.0-65.3) | 14.0 (9.5-18.6)  | 21.5 (17.3-25.7) | 14.7 (10.3-19.1) | 3.3 (1.4-5.4)  | 1.7  |
|  |              | Italy                  | 58.6 (51.2-65.7) | 49.0 (41.6-56.6) | 12.1 (8.0-16.3)  | 18.7 (14.9-22.7) | 12.8 (9.0-16.8)  | 1.1 (-0.8-3.0) | 21.0 |
|  |              | Latvia                 | 70.5 (62.7-77.2) | 61.9 (53.3-69.7) | 14.8 (10.0-19.7) | 22.6 (18.1-27.1) | 15.4 (10.9-20.1) | 4.1 (1.9-6.6)  | 2.2  |
|  |              | Lithuania              | 73.5 (66.4-79.5) | 65.3 (57.3-72.5) | 15.4 (10.6-20.5) | 23.5 (19.0-28.0) | 16.1 (11.1-20.8) | 4.9 (2.7-7.4)  | 3.2  |
|  |              | Luxembourg             | 71.6 (65.1-77.3) | 63.2 (55.9-69.8) | 15.0 (10.2-19.9) | 22.9 (18.5-27.2) | 15.6 (11.0-20.1) | 4.4 (2.4-6.7)  | 0.2  |
|  |              | Malta                  | 58.3 (49.7-66.4) | 48.7 (40.2-57.3) | 12.0 (7.9-16.4)  | 18.7 (14.6-23.0) | 12.7 (8.8-16.9)  | 1.0 (-1.2-3.2) | 0.2  |
|  |              | Netherlands            | 72.8 (66.5-78.4) | 64.5 (57.4-71.2) | 15.3 (10.3-20.2) | 23.3 (18.8-27.7) | 15.9 (11.1-20.6) | 4.7 (2.6-7.1)  | 8.1  |
|  |              | Norway                 | 68.3 (61.3-74.6) | 59.4 (51.8-66.6) | 14.2 (9.6-18.9)  | 21.8 (17.5-26.2) | 14.9 (10.3-19.3) | 3.5 (1.6-5.7)  | 1.9  |
|  |              | Poland                 | 67.5 (59.5-74.7) | 58.5 (50.0-66.7) | 14.1 (9.5-19.0)  | 21.6 (17.3-26.2) | 14.7 (10.2-19.2) | 3.3 (1.2-5.8)  | 27.0 |
|  |              | Portugal               | 56.6 (47.8-65.0) | 47.0 (38.4-55.8) | 11.6 (7.6-16.0)  | 18.1 (14.1-22.5) | 12.4 (8.4-16.5)  | 0.6 (-1.7-2.9) | 4.2  |
|  |              | Slovakia               | 65.1 (57.0-72.4) | 55.9 (47.4-64.1) | 13.5 (9.1-18.2)  | 20.8 (16.5-25.3) | 14.2 (9.8-18.7)  | 2.7 (0.6-5.0)  | 3.6  |
|  |              | Slovenia               | 67.8 (59.9-74.8) | 58.9 (50.4-66.9) | 14.1 (9.5-18.8)  | 21.7 (17.3-26.1) | 14.8 (10.3-19.4) | 3.4 (1.3-5.9)  | 1.1  |
|  |              | Spain                  | 73.2 (66.8-78.8) | 65.0 (57.8-71.6) | 15.3 (10.5-20.3) | 23.4 (19.0-27.7) | 16.0 (11.2-20.7) | 4.8 (2.8-7.1)  | 19.3 |
|  |              | Sweden                 | 76.9 (71.1-81.8) | 69.4 (62.6-75.3) | 16.3 (11.1-21.4) | 24.6 (19.9-29.1) | 16.8 (11.8-21.6) | 5.8 (3.6-8.2)  | 4.6  |
|  |              | Switzerland            | 76.3 (69.7-81.8) | 68.6 (61.0-75.3) | 16.0 (10.9-21.1) | 24.3 (19.7-28.8) | 16.7 (11.6-21.5) | 5.6 (3.3-8.1)  | 3.4  |
|  |              | United Kingdom         | 64.1 (57.1-70.6) | 54.8 (47.5-62.0) | 13.3 (9.0-17.8)  | 20.5 (16.5-24.7) | 14.0 (9.8-18.2)  | 2.4 (0.6-4.5)  | 26.6 |
|  | Upper-middle |                        |                  |                  |                  |                  |                  |                |      |
|  |              | Armenia                | 77.4 (69.5-83.6) | 70.0 (60.8-77.6) | 16.4 (11.2-21.7) | 24.8 (20.0-29.8) | 16.9 (11.8-21.9) | 5.9 (3.4-8.8)  | 2.4  |
|  |              | Belarus                | 85.9 (80.5-90.0) | 80.5 (73.7-86.0) | 18.4 (12.8-23.7) | 27.5 (22.6-32.3) | 18.7 (13.2-24.0) | 8.2 (5.4-11.1) | 13.4 |
|  |              | Bosnia and Herzegovina | 74.5 (66.1-81.5) | 66.5 (57.0-75.0) | 15.7 (10.6-20.8) | 23.8 (19.1-28.8) | 16.3 (11.4-21.3) | 5.1 (2.6-8.0)  | 3.0  |
|  |              | Bulgaria               | 61.4 (52.7-69.4) | 52.0 (43.1-60.7) | 12.7 (8.3-17.3)  | 19.6 (15.3-24.1) | 13.4 (9.3-17.7)  | 1.8 (-0.4-4.2) | 6.4  |



|  |              |                                  |                  |                   |                  |                  |                  |                 |                  |
|--|--------------|----------------------------------|------------------|-------------------|------------------|------------------|------------------|-----------------|------------------|
|  | High         |                                  |                  |                   |                  |                  |                  |                 |                  |
|  |              | Australia                        | 69.6 (62.1-76.3) | 60.9 (52.7-68.6)  | 14.6 (9.9-19.4)  | 22.3 (17.9-26.8) | 15.2 (10.6-19.8) | 3.9 (1.7-6.3)   | 7.7              |
|  |              | Brunei Darussalam                | 72.7 (61.7-81.5) | 64.4 (52.3-75.0)  | 15.2 (10.1-20.7) | 23.2 (18.1-28.6) | 15.8 (10.9-21.1) | 4.7 (1.6-8.0)   | 0.1              |
|  |              | French Polynesia                 | 82.1 (75.6-87.2) | 75.7 (67.8-82.2)  | 17.5 (12.0-23.0) | 26.3 (21.3-31.2) | 17.9 (12.6-23.1) | 7.2 (4.5-10.0)  | 0.2              |
|  |              | Japan                            | 64.5 (46.2-79.5) | 55.3 (36.9-72.5)  | 13.4 (7.9-19.4)  | 20.6 (14.1-27.5) | 14.0 (8.8-19.9)  | 2.5 (-2.1-7.2)  | 53.0             |
|  |              | New Zealand                      | 57.6 (50.2-64.7) | 48.0 (40.7-55.5)  | 11.8 (7.9-16.1)  | 18.4 (14.6-22.5) | 12.5 (8.8-16.5)  | 0.8 (-1.1-2.7)  | 1.3              |
|  |              | Palau                            | 59.1 (48.7-68.9) | 49.6 (39.2-60.1)  | 12.1 (7.8-16.8)  | 18.9 (14.3-23.6) | 12.9 (8.7-17.3)  | 1.2 (-1.6-3.9)  | 0.0 <sup>e</sup> |
|  |              | Republic of Korea                | 64.6 (47.1-79.1) | 55.4 (37.7-72.0)  | 13.4 (8.1-19.3)  | 20.7 (14.0-27.6) | 14.1 (8.7-20.1)  | 2.6 (-2.0-7.0)  | 17.7             |
|  |              | Singapore                        | 63.5 (45.7-78.3) | 54.2 (36.4-71.0)  | 13.1 (7.7-19.1)  | 20.3 (13.6-27.4) | 13.9 (8.5-19.8)  | 2.2 (-2.5-6.8)  | 1.6              |
|  | Upper-middle |                                  |                  |                   |                  |                  |                  |                 |                  |
|  |              | American Samoa                   | 46.6 (35.0-58.6) | 37.2 (26.8-49.0)  | 9.5 (5.6-13.7)   | 14.9 (10.5-19.7) | 10.2 (6.5-14.4)  | -1.9 (-5.3-1.1) | 0.0 <sup>e</sup> |
|  |              | China                            | 85.9 (80.6-89.9) | 80.5 (73.9-85.8)  | 18.3 (12.7-23.8) | 27.4 (22.5-32.2) | 18.8 (13.2-24.1) | 8.2 (5.5-11.0)  | 1016.5           |
|  |              | Cook Islands                     | 81.5 (75.1-86.7) | 75.0 (67.2-81.6)  | 17.3 (12.0-22.7) | 26.0 (21.2-30.8) | 17.8 (12.5-22.9) | 7.0 (4.4-9.8)   | 0.0 <sup>e</sup> |
|  |              | Fiji                             | 82.6 (76.4-87.5) | 76.3 (68.8-82.6)  | 17.6 (12.2-22.9) | 26.4 (21.6-31.2) | 18.0 (12.7-23.2) | 7.3 (4.7-10.1)  | 0.8              |
|  |              | Malaysia                         | 61.2 (51.4-70.3) | 51.7 (41.8-61.7)  | 12.7 (8.3-17.4)  | 19.5 (15.1-24.4) | 13.4 (9.1-17.8)  | 1.7 (-0.8-4.4)  | 10.9             |
|  |              | Marshall Islands                 | 56.5 (46.3-66.2) | 46.9 (37.0-57.1)  | 11.6 (7.5-16.1)  | 18.1 (13.8-22.7) | 12.3 (8.3-16.5)  | 0.5 (-2.1-3.2)  | 0.0 <sup>e</sup> |
|  |              | Nauru                            | 57.9 (46.7-68.3) | 48.3 (37.3-59.4)  | 11.9 (7.6-16.8)  | 18.5 (14.0-23.4) | 12.6 (8.5-17.2)  | 0.9 (-2.1-3.9)  | 0.0 <sup>e</sup> |
|  |              | Samoa                            | 87.4 (82.3-91.3) | 82.5 (76.0-87.7)  | 18.8 (13.0-24.4) | 28.0 (22.9-32.9) | 19.1 (13.4-24.6) | 8.6 (5.8-11.5)  | 0.1              |
|  |              | Tonga                            | 82.6 (76.4-87.6) | 76.3 (68.8-82.8)  | 17.6 (12.1-22.9) | 26.4 (21.5-31.3) | 18.0 (12.7-23.2) | 7.3 (4.7-10.2)  | 0.1              |
|  |              | Tuvalu                           | 72.7 (64.6-79.5) | 64.4 (55.4-72.5)  | 15.2 (10.3-20.3) | 23.2 (18.7-28.0) | 15.8 (11.0-20.7) | 4.6 (2.3-7.4)   | 0.0 <sup>e</sup> |
|  | Lower-middle |                                  |                  |                   |                  |                  |                  |                 |                  |
|  |              | Cambodia                         | 89.5 (84.3-93.1) | 85.3 (78.5-90.2)  | 19.2 (13.5-24.9) | 28.6 (23.5-33.6) | 19.5 (13.9-25.0) | 9.1 (6.2-12.2)  | 9.9              |
|  |              | Federated States of Micronesia   | 63.4 (54.0-71.8) | 54.1 (44.4-63.4)  | 13.1 (8.5-17.9)  | 20.2 (15.6-25.0) | 13.8 (9.5-18.3)  | 2.3 (-0.2-4.9)  | 0.0              |
|  |              | Kiribati                         | 59.6 (49.8-68.8) | 50.1 (40.3-60.0)  | 12.3 (8.0-17.0)  | 19.0 (14.6-23.7) | 13.0 (8.9-17.4)  | 1.3 (-1.3-4.0)  | 0.0              |
|  |              | Lao People's Democratic Republic | 83.7 (79.7-87.7) | 77.7 (72.7-82.9)  | 17.9 (12.4-23.1) | 26.8 (22.0-31.2) | 18.3 (12.9-23.3) | 7.6 (5.1-10.1)  | 3.9              |
|  |              | Mongolia                         | 81.4 (75.6-86.1) | 74.8 (67.8-80.8)  | 17.3 (11.9-22.6) | 26.0 (21.3-30.7) | 17.8 (12.7-22.7) | 7.0 (4.5-9.6)   | 2.1              |
|  |              | Niue                             | 93.1 (90.1-95.2) | 90.2 (86.1-93.01) | 20.1 (14.1-25.8) | 29.8 (24.5-34.7) | 20.3 (14.4-25.9) | 10.1 (7.0-13.1) | 0.0 <sup>e</sup> |
|  |              | Papua New Guinea                 | 85.2 (78.1-90.3) | 79.6 (70.8-86.4)  | 18.2 (12.6-23.9) | 27.3 (22.1-32.4) | 18.6 (13.2-24.0) | 8.0 (5.1-11.1)  | 5.2              |

|  |  |                 |                  |                  |                  |                  |                  |                |                  |
|--|--|-----------------|------------------|------------------|------------------|------------------|------------------|----------------|------------------|
|  |  | Philippines     | 60.3 (51.4-68.7) | 50.8 (41.8-59.9) | 12.4 (8.2-17.0)  | 19.3 (14.9-23.8) | 13.2 (9.1-17.6)  | 1.5 (-0.9-3.9) | 46.2             |
|  |  | Solomon Islands | 81.8 (75.2-87.0) | 75.3 (67.3-82.0) | 17.4 (12.0-22.8) | 26.1 (21.3-31.0) | 17.9 (12.6-23.1) | 7.1 (4.5-9.8)  | 0.2              |
|  |  | Tokelau         | 88.9 (83.9-92.5) | 84.5 (78.0-89.3) | 19.1 (13.3-24.7) | 28.4 (23.4-33.4) | 19.4 (13.7-25.0) | 9.0 (6.1-12.0) | 0.0 <sup>e</sup> |
|  |  | Vanuatu         | 92.0 (88.4-94.6) | 88.7 (83.8-92.3) | 19.8 (14.1-25.5) | 29.4 (24.4-34.3) | 20.1 (14.3-25.6) | 9.8 (6.9-12.8) | 0.1              |
|  |  | Viet Nam        | 74.6 (66.9-81.1) | 66.6 (57.9-74.5) | 15.7 (10.7-20.9) | 23.9 (19.2-28.7) | 16.3 (11.5-21.3) | 5.2 (2.7-7.9)  | 39.6             |

Number of deaths averted for males and females may not add up to the estimate for both sexes. This is because the distributions of deaths across males and females are not even, and differences are magnified when multiplied by a derivative of activity prevalence which also varies considerably by sex.

a: The main estimates calculated using Formula 3 (see Box 1), the adjusted relative risk, and 0% activity counterfactual.

b: The unadjusted estimates calculated using Formula 2 (see Box 1), the unadjusted relative risk, and 0% activity counterfactual.

c: The partially adjusted estimates calculated using Formula 2 (see Box 1), the adjusted relative risk, and 0% activity counterfactual.

d: The adjusted estimates calculated using Formula 5 (see Appendix 10, pp23-25), the adjusted relative risk, and 54.3% activity counterfactual.

e: Deaths averted based on an imputed estimate of total deaths between the ages of 40-79 years. This was derived using the median ratio of deaths to total population for countries in the same region/income categories (Appendix 9, p22).

**Appendix 13A. The Prevented Fractions for the Population and corresponding number of deaths averted for women, by country, region and income group.**

| World Health Organization region | World Bank income group classification | Country       | Prevalence of activity (95% confidence intervals) | Prevalence of activity amongst those that died (95% confidence intervals) | Prevented Fractions for the Population (95% confidence intervals) |                                                               |                                                                       |                                                              |                                                                   |
|----------------------------------|----------------------------------------|---------------|---------------------------------------------------|---------------------------------------------------------------------------|-------------------------------------------------------------------|---------------------------------------------------------------|-----------------------------------------------------------------------|--------------------------------------------------------------|-------------------------------------------------------------------|
|                                  |                                        |               |                                                   |                                                                           | Main adjusted estimate (0% activity counterfactual) <sup>a</sup>  | Unadjusted estimate (0% activity counterfactual) <sup>b</sup> | Partially adjusted estimate (0% activity counterfactual) <sup>c</sup> | Adjusted estimate (54.3% active counterfactual) <sup>d</sup> | Number of deaths averted between ages of 40-74 years (thousands ) |
| Africa                           |                                        |               |                                                   |                                                                           |                                                                   |                                                               |                                                                       |                                                              |                                                                   |
|                                  | High                                   |               |                                                   |                                                                           |                                                                   |                                                               |                                                                       |                                                              |                                                                   |
|                                  |                                        | Seychelles    | 80.0 (72.8-85.6)                                  | 73.1 (64.5-80.2)                                                          | 17.0 (11.7-22.3)                                                  | 25.6 (20.7-30.5)                                              | 17.5 (12.2-22.6)                                                      | 8.3 (5.3-11.5)                                               | 0.0                                                               |
|                                  | Upper-middle                           |               |                                                   |                                                                           |                                                                   |                                                               |                                                                       |                                                              |                                                                   |
|                                  |                                        | Algeria       | 59.8 (49.7-69.0)                                  | 50.3 (40.2-60.2)                                                          | 12.4 (8.1-17.0)                                                   | 19.1 (14.7-23.7)                                              | 13.0 (8.8-17.5)                                                       | 3.1 (0.5-6.0)                                                | 4.2                                                               |
|                                  |                                        | Botswana      | 73.7 (66.9-79.5)                                  | 65.6 (57.9-72.5)                                                          | 15.5 (10.7-20.5)                                                  | 23.6 (19.2-28.2)                                              | 16.1 (11.3-20.8)                                                      | 6.6 (4.1-9.4)                                                | 0.5                                                               |
|                                  |                                        | Gabon         | 66.8 (56.9-75.4)                                  | 57.8 (47.3-67.6)                                                          | 13.8 (9.2-18.9)                                                   | 21.3 (16.7-26.2)                                              | 14.6 (10.0-19.3)                                                      | 4.8 (2.1-7.9)                                                | 0.4                                                               |
|                                  |                                        | Mauritius     | 68.2 (59.5-75.7)                                  | 59.3 (50.0-67.9)                                                          | 14.2 (9.6-19.2)                                                   | 21.8 (17.3-26.5)                                              | 14.9 (10.4-19.5)                                                      | 5.2 (2.7-8.1)                                                | 0.3                                                               |
|                                  |                                        | Namibia       | 62.6 (53.9-70.5)                                  | 53.2 (44.3-61.9)                                                          | 13.0 (8.7-17.6)                                                   | 20.0 (15.7-24.5)                                              | 13.7 (9.4-18.1)                                                       | 3.8 (1.5-6.5)                                                | 0.5                                                               |
|                                  |                                        | South Africa  | 52.7 (43.0-62.3)                                  | 43.1 (33.9-52.9)                                                          | 10.8 (6.9-15.1)                                                   | 16.8 (12.7-21.4)                                              | 11.5 (7.8-15.7)                                                       | 1.4 (-1.2-4.0)                                               | 14.0                                                              |
|                                  | Lower-middle                           |               |                                                   |                                                                           |                                                                   |                                                               |                                                                       |                                                              |                                                                   |
|                                  |                                        | Cabo Verde    | 75.0 (68.2-80.8)                                  | 67.1 (59.3-74.1)                                                          | 15.8 (10.7-21.0)                                                  | 24.0 (19.4-28.6)                                              | 16.4 (11.5-21.2)                                                      | 7.0 (4.3-9.8)                                                | 0.1                                                               |
|                                  |                                        | Cameroon      | 64.8 (57.2-71.8)                                  | 55.6 (47.6-63.4)                                                          | 13.5 (9.1-18.0)                                                   | 20.7 (16.5-25.2)                                              | 14.2 (9.9-18.6)                                                       | 4.4 (2.2-6.9)                                                | 4.7                                                               |
|                                  |                                        | Congo         | 68.7 (60.8-75.7)                                  | 59.9 (51.3-67.9)                                                          | 14.3 (9.7-19.1)                                                   | 21.9 (17.6-26.5)                                              | 15.0 (10.5-19.5)                                                      | 5.3 (2.9-8.1)                                                | 1.0                                                               |
|                                  |                                        | Côte d'Ivoire | 62.7 (55.4-70.0)                                  | 53.3 (45.8-61.3)                                                          | 13.0 (8.6-17.4)                                                   | 20.0 (16.0-24.2)                                              | 13.7 (9.5-17.9)                                                       | 3.8 (1.7-6.3)                                                | 5.7                                                               |
|                                  |                                        | Eswatini      | 67.9 (61.8-74.0)                                  | 59.0 (52.4-65.9)                                                          | 14.2 (9.6-18.9)                                                   | 21.7 (17.5-25.9)                                              | 14.8 (10.5-19.1)                                                      | 5.1 (3.0-7.5)                                                | 0.3                                                               |
|                                  |                                        | Ghana         | 75.2 (70.2-80.1)                                  | 67.3 (61.6-73.2)                                                          | 15.8 (10.7-20.8)                                                  | 24.1 (19.7-28.4)                                              | 16.4 (11.6-21.2)                                                      | 7.0 (4.5-9.6)                                                | 6.7                                                               |
|                                  |                                        | Kenya         | 83.1 (80.5-85.7)                                  | 77.0 (73.7-80.3)                                                          | 17.7 (12.3-22.9)                                                  | 26.6 (22.0-30.9)                                              | 18.1 (12.8-23.2)                                                      | 9.1 (6.2-11.8)                                               | 7.8                                                               |
|                                  |                                        | Lesotho       | 94.0 (91.4-95.8)                                  | 91.4 (87.8-93.9)                                                          | 20.3 (14.4-26.0)                                                  | 30.0 (24.9-35.0)                                              | 20.5 (14.5-26.0)                                                      | 12.0 (8.5-15.4)                                              | 1.4                                                               |
|                                  |                                        | Mauritania    | 53.9 (45.6-62.3)                                  | 44.3 (36.3-52.9)                                                          | 11.0 (7.1-15.2)                                                   | 17.2 (13.3-21.2)                                              | 11.7 (8.0-15.6)                                                       | 1.7 (-0.5-4.0)                                               | 0.5                                                               |
|                                  |                                        | Nigeria       | 70.4 (63.7-76.3)                                  | 61.8 (54.4-68.6)                                                          | 14.7 (10.0-19.5)                                                  | 22.5 (18.2-27.0)                                              | 15.4 (10.8-20.0)                                                      | 5.8 (3.4-8.4)                                                | 50.5                                                              |



|  |              |                                  |                  |                  |                  |                  |                  |                 |                  |
|--|--------------|----------------------------------|------------------|------------------|------------------|------------------|------------------|-----------------|------------------|
|  | High         |                                  |                  |                  |                  |                  |                  |                 |                  |
|  |              | Argentina                        | 54.7 (45.8-63.4) | 45.1 (36.5-54.1) | 11.2 (7.1-15.5)  | 17.5 (13.5-21.7) | 11.9 (8.1-15.8)  | 1.8 (-0.5-4.4)  | 5.9              |
|  |              | Bahamas                          | 44.4 (35.3-54.0) | 35.2 (27.1-44.4) | 9.0 (5.5-12.9)   | 14.2 (10.5-18.2) | 9.7 (6.4-13.3)   | -0.6 (-3.2-1.8) | 0.0              |
|  |              | Barbados                         | 45.1 (35.5-54.6) | 35.8 (27.2-45.0) | 9.1 (5.7-13.0)   | 14.4 (10.6-18.6) | 9.9 (6.5-13.6)   | -0.5 (-3.0-1.9) | 0.0              |
|  |              | Bermuda                          | 67.9 (58.2-76.3) | 59.0 (48.6-68.6) | 14.2 (9.4-19.2)  | 21.7 (17.0-26.6) | 14.8 (10.1-19.6) | 5.1 (2.4-8.3)   | 0.0 <sup>e</sup> |
|  |              | British Virgin Islands           | 64.3 (55.3-72.4) | 55.0 (45.7-64.1) | 13.3 (8.8-18.1)  | 20.6 (16.1-25.3) | 14.1 (9.8-18.5)  | 4.2 (1.8-7.0)   | 0.0 <sup>e</sup> |
|  |              | Canada                           | 68.6 (60.3-75.9) | 59.8 (50.8-68.2) | 14.3 (9.5-19.2)  | 21.9 (17.6-26.6) | 15.0 (10.4-19.6) | 5.3 (2.8-8.1)   | 5.8              |
|  |              | Cayman Islands                   | 61.9 (52.0-70.9) | 52.5 (42.4-62.4) | 12.8 (8.3-17.5)  | 19.7 (15.2-24.5) | 13.5 (9.2-18.0)  | 3.6 (1.0-6.6)   | 0.0 <sup>e</sup> |
|  |              | Chile                            | 71.4 (63.6-79.1) | 62.9 (54.3-72.0) | 15.0 (10.1-20.0) | 22.9 (18.3-27.6) | 15.6 (11.0-20.3) | 6.0 (3.4-9.0)   | 3.4              |
|  |              | Saint Kitts and Nevis            | 59.6 (49.4-69.1) | 50.1 (39.9-60.3) | 12.2 (7.9-16.9)  | 19.0 (14.6-23.7) | 13.0 (8.8-17.4)  | 3.0 (0.4-5.9)   | 0.0 <sup>e</sup> |
|  |              | Trinidad and Tobago              | 51.4 (38.8-63.7) | 41.8 (30.1-54.4) | 10.5 (6.3-15.2)  | 16.5 (11.5-21.9) | 11.2 (7.2-15.9)  | 1.1 (-2.3-4.4)  | 0.3              |
|  |              | United States of America         | 52.0 (43.9-59.9) | 42.4 (34.7-50.4) | 10.6 (7.0-14.7)  | 16.7 (13.0-20.6) | 11.4 (7.8-15.1)  | 1.2 (-0.8-3.4)  | 48.0             |
|  |              | Uruguay                          | 74.3 (66.7-80.6) | 66.3 (57.7-73.9) | 15.6 (10.7-20.7) | 23.7 (19.2-28.3) | 16.2 (11.5-21.0) | 6.8 (4.1-9.7)   | 0.8              |
|  | Upper-middle |                                  |                  |                  |                  |                  |                  |                 |                  |
|  |              | Bolivarian Republic of Venezuela | 70.5 (62.5-77.5) | 61.9 (53.1-70.1) | 14.8 (10.0-19.8) | 22.6 (18.1-27.2) | 15.4 (10.7-20.1) | 5.8 (3.3-8.7)   | 5.5              |
|  |              | Brazil                           | 46.7 (38.2-55.4) | 37.3 (29.6-45.8) | 9.5 (6.1-13.4)   | 15.0 (11.4-18.9) | 10.2 (6.8-13.9)  | -0.1 (-2.4-2.2) | 24.7             |
|  |              | Colombia                         | 51.1 (42.0-60.1) | 41.5 (33.0-50.6) | 10.4 (6.7-14.5)  | 16.4 (12.4-20.5) | 11.2 (7.5-15.0)  | 1.0 (-1.4-3.4)  | 6.0              |
|  |              | Costa Rica                       | 45.7 (37.1-54.5) | 36.4 (28.6-44.9) | 9.3 (5.9-13.1)   | 14.6 (11.0-18.5) | 10.0 (6.7-13.4)  | -0.3 (-2.6-2.0) | 0.4              |
|  |              | Cuba                             | 57.2 (48.3-65.7) | 47.6 (38.8-56.6) | 11.8 (7.7-16.0)  | 18.3 (14.3-22.7) | 12.5 (8.6-16.7)  | 2.5 (0.3-4.9)   | 2.0              |
|  |              | Dominica                         | 70.2 (61.9-77.3) | 61.6 (52.5-69.8) | 14.7 (9.9-19.7)  | 22.5 (17.9-27.2) | 15.3 (10.7-20.0) | 5.7 (3.2-8.6)   | 0.0 <sup>e</sup> |
|  |              | Dominican Republic               | 56.6 (47.4-65.4) | 47.0 (38.0-56.2) | 11.7 (7.6-16.0)  | 18.1 (13.9-22.6) | 12.3 (8.4-16.5)  | 2.3 (0.0-4.9)   | 1.4              |
|  |              | Ecuador                          | 70.3 (61.9-78.7) | 61.7 (52.5-71.5) | 14.7 (9.8-19.9)  | 22.5 (17.8-27.2) | 15.4 (10.6-20.1) | 5.7 (3.0-8.9)   | 2.1              |
|  |              | Grenada                          | 64.6 (54.9-73.2) | 55.4 (45.3-65.0) | 13.4 (8.9-18.3)  | 20.7 (16.1-25.5) | 14.1 (9.7-18.8)  | 4.3 (1.7-7.2)   | 0.0              |
|  |              | Guatemala                        | 62.9 (52.1-72.5) | 53.5 (42.5-64.2) | 13.0 (8.5-17.9)  | 20.1 (15.4-25.2) | 13.7 (9.4-18.6)  | 3.9 (1.1-7.0)   | 1.6              |
|  |              | Jamaica                          | 63.4 (54.4-71.5) | 54.1 (44.8-63.0) | 13.1 (8.6-17.8)  | 20.3 (15.9-24.8) | 13.8 (9.6-18.2)  | 4.0 (1.7-6.7)   | 0.4              |
|  |              | Mexico                           | 67.8 (60.3-74.5) | 58.9 (50.8-66.5) | 14.2 (9.6-18.9)  | 21.7 (17.4-26.1) | 14.8 (10.3-19.3) | 5.1 (2.9-7.7)   | 16.6             |
|  |              | Paraguay                         | 63.2 (54.7-71.8) | 53.9 (45.1-63.4) | 13.1 (8.7-17.9)  | 20.2 (15.8-24.7) | 13.8 (9.6-18.2)  | 4.0 (1.5-6.8)   | 0.9              |



|                       |              |                              |                  |                  |                  |                  |                  |                  |                  |
|-----------------------|--------------|------------------------------|------------------|------------------|------------------|------------------|------------------|------------------|------------------|
|                       |              | Saint Lucia                  | 47.9 (36.7-59.2) | 38.5 (28.3-49.7) | 9.7 (6.0-14.1)   | 15.4 (11.0-20.1) | 10.5 (6.8-14.7)  | 0.2 (-2.7-3.2)   | 0.0              |
|                       |              | Suriname                     | 49.4 (40.7-58.0) | 39.9 (31.8-48.4) | 10.1 (6.4-14.0)  | 15.8 (12.1-19.8) | 10.8 (7.3-14.5)  | 0.6 (-1.7-2.9)   | 0.1              |
| Eastern Mediterranean |              |                              |                  |                  |                  |                  |                  |                  |                  |
|                       | High         |                              |                  |                  |                  |                  |                  |                  |                  |
|                       |              | Kuwait                       | 25.4 (18.7-33.4) | 18.8 (13.5-25.4) | 5.0 (2.8-7.6)    | 8.1 (5.4-11.2)   | 5.5 (3.4-8.1)    | -5.0 (-7.8--2.7) | 0.1              |
|                       |              | Oman                         | 59.8 (50.0-68.9) | 50.3 (40.5-60.1) | 12.4 (8.0-16.9)  | 19.1 (14.7-23.7) | 13.0 (9.0-17.3)  | 3.1 (0.6-5.9)    | 0.2              |
|                       |              | Qatar                        | 51.3 (41.3-61.2) | 41.7 (32.4-51.7) | 10.4 (6.6-14.8)  | 16.4 (12.3-20.9) | 11.2 (7.6-15.3)  | 1.0 (-1.6-3.7)   | 0.0              |
|                       |              | Saudi Arabia                 | 34.9 (26.6-44.2) | 26.7 (19.8-35.0) | 6.9 (4.1-10.3)   | 11.2 (7.8-14.9)  | 7.6 (4.8-10.8)   | -2.8 (-5.6--0.6) | 1.3              |
|                       |              | United Arab Emirates         | 50.7 (41.5-59.8) | 41.1 (32.5-50.3) | 10.3 (6.6-14.4)  | 16.2 (12.3-20.4) | 11.0 (7.5-15.0)  | 0.9 (-1.5-3.3)   | 0.2              |
|                       | Upper-middle |                              |                  |                  |                  |                  |                  |                  |                  |
|                       |              | Iraq                         | 35.4 (27.6-44.2) | 27.1 (20.6-35.0) | 7.1 (4.3-10.4)   | 11.3 (8.1-15.0)  | 7.7 (5.0-10.9)   | -2.7 (-5.3--0.5) | 2.1              |
|                       |              | Islamic Republic of Iran     | 76.9 (70.2-82.6) | 69.4 (61.6-76.3) | 16.3 (11.3-21.2) | 24.6 (19.8-29.2) | 16.8 (11.7-21.9) | 7.4 (4.8-10.3)   | 11.3             |
|                       |              | Jordan                       | 86.5 (81.2-90.5) | 81.3 (74.6-86.6) | 18.6 (13.0-24.1) | 27.7 (22.8-32.5) | 18.8 (13.3-24.2) | 10.0 (6.8-13.3)  | 1.3              |
|                       |              | Lebanon                      | 67.0 (58.0-75.0) | 58.0 (48.4-67.1) | 14.0 (9.3-18.7)  | 21.4 (17.0-26.1) | 14.6 (10.1-19.2) | 4.9 (2.3-7.8)    | 0.6              |
|                       |              | Libya                        | 58.5 (48.3-68.0) | 48.9 (38.8-59.1) | 12.0 (7.8-16.6)  | 18.7 (14.3-23.4) | 12.8 (8.5-17.1)  | 2.8 (0.2-5.7)    | 0.7              |
|                       | Lower-middle |                              |                  |                  |                  |                  |                  |                  |                  |
|                       |              | Egypt                        | 61.2 (51.5-70.1) | 51.7 (41.9-61.4) | 12.6 (8.3-17.3)  | 19.6 (15.1-24.3) | 13.4 (9.1-17.9)  | 3.5 (1.0-6.3)    | 15.9             |
|                       |              | Morocco                      | 68.6 (58.3-77.4) | 59.8 (48.7-70.0) | 14.3 (9.4-19.3)  | 21.9 (17.0-26.9) | 14.9 (10.2-19.7) | 5.3 (2.5-8.4)    | 4.5              |
|                       |              | Pakistan                     | 56.7 (40.5-72.9) | 47.1 (31.6-64.6) | 11.6 (6.4-17.3)  | 18.1 (11.9-24.6) | 12.4 (7.7-17.8)  | 2.3 (-2.4-6.9)   | 26.1             |
|                       |              | Occupied Palestine Territory | 51.2 (42.2-60.2) | 41.6 (33.2-50.7) | 10.4 (6.7-14.5)  | 16.4 (12.4-20.6) | 11.2 (7.5-15.1)  | 1.0 (-1.3-3.4)   | 0.3              |
|                       |              | Tunisia                      | 65.9 (56.6-74.2) | 56.8 (47.0-66.2) | 13.7 (9.1-18.6)  | 21.1 (16.6-25.8) | 14.4 (10.0-18.9) | 4.7 (2.2-7.5)    | 1.8              |
| Europe                |              |                              |                  |                  |                  |                  |                  |                  |                  |
|                       | High         |                              |                  |                  |                  |                  |                  |                  |                  |
|                       |              | Andorra                      | 60.0 (51.5-68.0) | 50.5 (41.9-59.1) | 12.4 (8.2-16.8)  | 19.2 (15.0-23.5) | 13.1 (9.0-17.3)  | 3.2 (0.9-5.6)    | 0.0 <sup>e</sup> |
|                       |              | Austria                      | 66.4 (58.9-73.2) | 57.3 (49.3-65.0) | 13.8 (9.3-18.4)  | 21.3 (16.9-25.7) | 14.5 (10.1-18.9) | 4.7 (2.5-7.2)    | 1.5              |
|                       |              | Belgium                      | 59.4 (51.6-66.7) | 49.9 (42.0-57.7) | 12.3 (8.1-16.7)  | 19.0 (15.0-23.1) | 13.0 (9.1-17.1)  | 3.0 (1.0-5.3)    | 1.7              |
|                       |              | Croatia                      | 64.2 (55.3-72.1) | 54.9 (45.7-63.7) | 13.3 (8.8-18.1)  | 20.5 (16.2-25.0) | 14.0 (9.6-18.5)  | 4.2 (1.8-7.0)    | 1.1              |
|                       |              | Cyprus                       | 49.5 (41.2-57.8) | 40.0 (32.3-48.2) | 10.1 (6.5-14.1)  | 15.8 (12.1-19.7) | 10.8 (7.3-14.6)  | 0.6 (-1.6-2.9)   | 0.1              |

|  |              |                        |                  |                  |                  |                  |                  |                |      |
|--|--------------|------------------------|------------------|------------------|------------------|------------------|------------------|----------------|------|
|  |              | Czechia                | 66.1 (57.6-73.7) | 57.0 (48.0-65.6) | 13.7 (9.1-18.6)  | 21.1 (16.8-25.9) | 14.4 (10.0-19.1) | 4.7 (2.3-7.4)  | 2.5  |
|  |              | Denmark                | 68.8 (61.6-75.2) | 60.0 (52.2-67.3) | 14.3 (9.8-19.0)  | 22.0 (17.8-26.4) | 15.0 (10.6-19.6) | 5.4 (3.1-7.9)  | 1.3  |
|  |              | Estonia                | 65.4 (56.9-73.0) | 56.2 (47.3-64.8) | 13.6 (9.0-18.3)  | 20.8 (16.4-25.3) | 14.3 (9.9-18.9)  | 4.5 (2.1-7.2)  | 0.3  |
|  |              | Finland                | 84.0 (79.4-87.8) | 78.1 (72.4-83.0) | 17.8 (12.4-23.0) | 26.9 (22.2-31.5) | 18.4 (12.9-23.4) | 9.3 (6.3-12.2) | 1.3  |
|  |              | France                 | 66.0 (58.6-72.7) | 56.9 (49.0-64.4) | 13.7 (9.2-18.3)  | 21.1 (16.8-25.5) | 14.4 (10.1-18.8) | 4.6 (2.5-7.1)  | 8.6  |
|  |              | Germany                | 55.9 (48.4-63.1) | 46.3 (38.9-53.8) | 11.5 (7.6-15.5)  | 17.8 (14.1-21.8) | 12.2 (8.4-16.0)  | 2.1 (0.3-4.2)  | 12.9 |
|  |              | Greece                 | 58.9 (51.0-66.3) | 49.3 (41.4-57.2) | 12.1 (8.0-16.5)  | 18.8 (14.8-23.0) | 12.9 (8.8-17.0)  | 2.9 (0.9-5.2)  | 1.4  |
|  |              | Hungary                | 56.7 (47.8-65.2) | 47.1 (38.4-56.0) | 11.6 (7.6-16.1)  | 18.1 (14.1-22.4) | 12.4 (8.5-16.5)  | 2.4 (0.1-4.9)  | 2.8  |
|  |              | Ireland                | 62.9 (55.3-69.9) | 53.5 (45.7-61.2) | 13.1 (8.8-17.6)  | 20.1 (16.1-24.5) | 13.8 (9.5-18.1)  | 3.9 (1.8-6.3)  | 0.6  |
|  |              | Italy                  | 53.8 (45.8-61.6) | 44.2 (36.5-52.2) | 11.1 (7.3-15.2)  | 17.2 (13.5-21.1) | 11.7 (8.1-15.5)  | 1.7 (-0.4-3.8) | 7.1  |
|  |              | Latvia                 | 67.1 (58.5-74.7) | 58.1 (48.9-66.7) | 14.0 (9.3-18.8)  | 21.5 (17.1-26.2) | 14.6 (10.2-19.3) | 4.9 (2.4-7.7)  | 0.7  |
|  |              | Lithuania              | 70.8 (62.9-77.5) | 62.2 (53.5-70.1) | 14.8 (10.0-19.7) | 22.6 (18.1-27.3) | 15.4 (10.7-20.1) | 5.9 (3.4-8.7)  | 1.0  |
|  |              | Luxembourg             | 69.6 (62.4-75.9) | 60.9 (53.0-68.2) | 14.5 (9.8-19.3)  | 22.3 (17.8-26.8) | 15.2 (10.6-19.8) | 5.6 (3.2-8.1)  | 0.1  |
|  |              | Malta                  | 52.8 (43.6-61.7) | 43.2 (34.4-52.3) | 10.7 (6.9-15.0)  | 16.9 (13.0-21.1) | 11.5 (7.8-15.5)  | 1.4 (-0.9-3.8) | 0.1  |
|  |              | Netherlands            | 71.0 (64.0-77.1) | 62.5 (54.7-69.6) | 14.9 (10.0-19.6) | 22.7 (18.2-27.1) | 15.5 (10.7-20.3) | 5.9 (3.5-8.6)  | 3.2  |
|  |              | Norway                 | 66.2 (58.6-73.0) | 57.1 (49.0-64.8) | 13.8 (9.3-18.4)  | 21.1 (16.9-25.5) | 14.4 (10.1-18.8) | 4.7 (2.5-7.2)  | 0.7  |
|  |              | Poland                 | 66.6 (58.1-74.3) | 57.5 (48.5-66.3) | 13.9 (9.3-18.6)  | 21.3 (16.9-25.8) | 14.5 (10.1-19.1) | 4.8 (2.4-7.6)  | 9.0  |
|  |              | Portugal               | 51.5 (42.4-60.5) | 41.9 (33.4-51.0) | 10.5 (6.7-14.7)  | 16.5 (12.6-20.7) | 11.2 (7.6-15.1)  | 1.1 (-1.3-3.6) | 1.3  |
|  |              | Slovakia               | 61.6 (52.9-69.7) | 52.2 (43.3-61.0) | 12.8 (8.4-17.3)  | 19.7 (15.4-24.2) | 13.5 (9.3-17.7)  | 3.6 (1.2-6.1)  | 1.2  |
|  |              | Slovenia               | 63.4 (54.6-71.3) | 54.1 (45.0-62.8) | 13.2 (8.7-17.9)  | 20.3 (15.9-24.8) | 13.8 (9.5-18.3)  | 4.0 (1.7-6.7)  | 0.3  |
|  |              | Spain                  | 69.5 (62.3-75.8) | 60.8 (52.9-68.0) | 14.5 (9.8-19.3)  | 22.2 (17.7-26.6) | 15.2 (10.6-19.6) | 5.5 (3.3-8.2)  | 5.8  |
|  |              | Sweden                 | 75.3 (68.9-80.7) | 67.5 (60.1-74.0) | 15.9 (10.8-20.9) | 24.1 (19.5-28.6) | 16.4 (11.6-21.2) | 7.0 (4.4-9.9)  | 1.8  |
|  |              | Switzerland            | 74.3 (67.3-80.3) | 66.3 (58.3-73.5) | 15.6 (10.7-20.7) | 23.8 (19.2-28.3) | 16.2 (11.4-21.1) | 6.8 (4.2-9.6)  | 1.2  |
|  |              | United Kingdom         | 60.0 (52.3-67.2) | 50.5 (42.7-58.2) | 12.4 (8.3-16.7)  | 19.2 (15.2-23.3) | 13.1 (9.0-17.2)  | 3.2 (1.2-5.5)  | 10.0 |
|  | Upper-middle |                        |                  |                  |                  |                  |                  |                |      |
|  |              | Armenia                | 77.9 (69.7-84.4) | 70.6 (61.0-78.6) | 16.4 (11.2-21.8) | 24.9 (20.0-30.0) | 17.0 (11.8-22.0) | 7.7 (4.7-10.9) | 1.0  |
|  |              | Belarus                | 85.6 (79.9-89.9) | 80.2 (73.0-85.8) | 18.3 (12.8-23.8) | 27.3 (22.4-32.2) | 18.7 (13.4-24.1) | 9.7 (6.6-13.0) | 4.4  |
|  |              | Bosnia and Herzegovina | 72.0 (62.7-79.7) | 63.6 (53.3-72.7) | 15.1 (10.2-20.2) | 23.0 (18.2-28.1) | 15.7 (10.9-20.7) | 6.2 (3.4-9.4)  | 1.1  |

|                 |              |                     |                  |                  |                  |                  |                  |                 |       |
|-----------------|--------------|---------------------|------------------|------------------|------------------|------------------|------------------|-----------------|-------|
|                 |              | Bulgaria            | 58.6 (49.3-67.2) | 49.0 (39.8-58.2) | 12.1 (7.9-16.6)  | 18.7 (14.5-23.4) | 12.8 (8.7-17.2)  | 2.8 (0.5-5.4)   | 2.1   |
|                 |              | Kazakhstan          | 71.3 (61.1-79.6) | 62.8 (51.6-72.6) | 14.9 (9.9-20.2)  | 22.8 (17.9-28.0) | 15.6 (10.7-20.6) | 6.0 (3.1-9.3)   | 5.0   |
|                 |              | Romania             | 61.7 (52.6-70.0) | 52.3 (43.0-61.3) | 12.8 (8.4-17.4)  | 19.8 (15.4-24.2) | 13.4 (9.2-17.8)  | 3.6 (1.2-6.3)   | 5.5   |
|                 |              | Russian Federation  | 82.4 (77.2-87.6) | 76.1 (69.7-82.8) | 17.6 (12.1-22.9) | 26.4 (21.6-31.1) | 18.0 (12.7-23.1) | 8.9 (5.9-12.0)  | 69.9  |
|                 |              | Serbia              | 56.2 (46.4-65.6) | 46.6 (37.0-56.5) | 11.5 (7.4-16.0)  | 18.0 (13.7-22.5) | 12.3 (8.3-16.5)  | 2.2 (-0.3-5.0)  | 2.4   |
|                 |              | Turkey              | 61.2 (51.5-70.1) | 51.7 (41.9-61.4) | 12.7 (8.3-17.3)  | 19.6 (15.1-24.3) | 13.4 (9.1-17.8)  | 3.5 (1.0-6.3)   | 9.2   |
|                 | Lower-middle |                     |                  |                  |                  |                  |                  |                 |       |
|                 |              | Georgia             | 81.4 (74.1-87.1) | 74.8 (66.0-82.1) | 17.3 (11.9-22.7) | 26.0 (21.0-31.0) | 17.8 (12.5-23.0) | 8.6 (5.5-11.9)  | 1.6   |
|                 |              | Kyrgyzstan          | 83.3 (75.2-89.1) | 77.2 (67.3-84.7) | 17.8 (12.2-23.4) | 26.6 (21.4-31.7) | 18.2 (12.7-23.5) | 9.1 (5.8-12.7)  | 1.2   |
|                 |              | Republic of Moldova | 89.1 (84.6-92.4) | 84.7 (78.9-89.2) | 19.1 (13.4-24.7) | 28.5 (23.5-33.3) | 19.5 (13.9-24.9) | 10.7 (7.4-14.0) | 2.0   |
|                 |              | Ukraine             | 79.6 (72.4-85.3) | 72.6 (64.1-79.8) | 16.9 (11.6-22.3) | 25.5 (20.7-30.4) | 17.4 (12.2-22.5) | 8.1 (5.2-11.4)  | 23.6  |
|                 |              | Uzbekistan          | 75.6 (66.1-83.1) | 67.8 (57.0-77.0) | 15.9 (10.8-21.2) | 24.2 (19.1-29.3) | 16.5 (11.4-21.6) | 7.1 (4.0-10.5)  | 6.0   |
|                 | Low          |                     |                  |                  |                  |                  |                  |                 |       |
|                 |              | Tajikistan          | 61.3 (50.1-71.5) | 51.8 (40.6-63.0) | 12.6 (8.1-17.5)  | 19.6 (15.0-24.5) | 13.4 (9.1-18.0)  | 3.4 (0.6-6.6)   | 0.9   |
| South-East Asia |              |                     |                  |                  |                  |                  |                  |                 |       |
|                 | Upper-middle |                     |                  |                  |                  |                  |                  |                 |       |
|                 |              | Maldives            | 65.2 (54.5-74.6) | 56.0 (44.9-66.6) | 13.5 (9.0-18.4)  | 20.9 (16.2-26.0) | 14.2 (9.7-19.1)  | 4.4 (1.6-7.6)   | 0.0   |
|                 |              | Thailand            | 72.8 (64.0-80.0) | 64.5 (54.7-73.1) | 15.2 (10.3-20.4) | 23.3 (18.5-28.2) | 15.9 (11.1-20.8) | 6.3 (3.6-9.5)   | 17.2  |
|                 | Lower-middle |                     |                  |                  |                  |                  |                  |                 |       |
|                 |              | Bangladesh          | 60.5 (44.2-76.9) | 51.0 (35.0-69.4) | 12.4 (7.0-18.4)  | 19.3 (12.9-26.1) | 13.2 (8.2-18.8)  | 3.2 (-1.5-8.0)  | 23.6  |
|                 |              | Bhutan              | 70.5 (63.9-77.2) | 61.9 (54.6-69.7) | 14.8 (10.0-19.5) | 22.5 (18.2-27.0) | 15.4 (10.8-20.0) | 5.8 (3.4-8.5)   | 0.2   |
|                 |              | India               | 56.1 (40.3-70.8) | 46.5 (31.5-62.2) | 11.5 (6.5-16.9)  | 17.9 (12.0-24.0) | 12.3 (7.6-17.5)  | 2.2 (-2.1-6.5)  | 242.4 |
|                 |              | Indonesia           | 78.3 (69.8-85.0) | 71.0 (61.1-79.4) | 16.6 (11.2-21.9) | 25.0 (20.1-30.0) | 17.1 (11.9-22.2) | 7.8 (4.8-11.2)  | 76.1  |
|                 |              | Myanmar             | 86.9 (81.5-90.8) | 81.8 (75.0-87.0) | 18.6 (12.9-24.2) | 27.8 (22.9-32.6) | 18.9 (13.4-24.2) | 10.1 (6.8-13.4) | 20.3  |
|                 |              | Sri Lanka           | 63.3 (52.5-72.8) | 54.0 (42.9-64.5) | 13.1 (8.5-18.1)  | 20.2 (15.5-25.2) | 13.8 (9.3-18.4)  | 3.9 (1.0-7.1)   | 3.9   |
|                 |              | Timor-Leste         | 74.5 (64.8-82.3) | 66.5 (55.6-76.0) | 15.6 (10.5-20.9) | 23.9 (18.9-29.0) | 16.3 (11.1-21.3) | 6.8 (3.7-10.2)  | 0.2   |
|                 | Low          |                     |                  |                  |                  |                  |                  |                 |       |
|                 |              | Nepal               | 85.4 (83.5-87.3) | 79.9 (77.5-82.4) | 18.2 (12.6-23.5) | 27.3 (22.5-31.8) | 18.6 (13.1-23.7) | 9.7 (6.6-12.5)  | 8.3   |

|                 |              |                                  |                  |                  |                  |                  |                  |                 |                  |
|-----------------|--------------|----------------------------------|------------------|------------------|------------------|------------------|------------------|-----------------|------------------|
| Western Pacific |              |                                  |                  |                  |                  |                  |                  |                 |                  |
|                 | High         |                                  |                  |                  |                  |                  |                  |                 |                  |
|                 |              | Australia                        | 66.4 (58.1-73.7) | 57.3 (48.5-65.6) | 13.8 (9.2-18.6)  | 21.2 (16.9-25.8) | 14.5 (10.0-18.9) | 4.7 (2.3-7.4)   | 2.8              |
|                 |              | Brunei Darussalam                | 66.1 (53.6-76.7) | 57.0 (44.0-69.1) | 13.7 (8.8-18.9)  | 21.1 (15.9-26.8) | 14.5 (9.7-19.7)  | 4.6 (1.3-8.2)   | 0.0              |
|                 |              | French Polynesia                 | 77.5 (69.6-83.8) | 70.1 (60.9-77.9) | 16.4 (11.2-21.6) | 24.7 (19.9-29.7) | 16.9 (11.8-21.9) | 7.6 (4.7-10.7)  | 0.1              |
|                 |              | Japan                            | 63.0 (43.5-79.0) | 53.6 (34.4-71.9) | 13.0 (7.3-19.3)  | 20.1 (13.3-27.3) | 13.8 (8.3-19.7)  | 3.9 (-1.4-9.0)  | 16.4             |
|                 |              | New Zealand                      | 54.7 (46.8-62.4) | 45.1 (37.4-53.0) | 11.2 (7.4-15.3)  | 17.5 (13.7-21.5) | 11.9 (8.2-15.9)  | 1.9 (-0.1-4.1)  | 0.5              |
|                 |              | Palau                            | 46.5 (35.3-58.1) | 37.1 (27.1-48.5) | 9.4 (5.6-13.8)   | 14.8 (10.5-19.5) | 10.1 (6.5-14.2)  | -0.1 (-3.2-2.9) | 0.0 <sup>e</sup> |
|                 |              | Republic of Korea                | 59.0 (40.1-75.6) | 49.4 (31.3-67.8) | 12.1 (6.7-18.2)  | 18.9 (12.2-25.8) | 12.8 (7.6-18.6)  | 2.8 (-2.3-7.8)  | 4.7              |
|                 |              | Singapore                        | 61.4 (42.5-77.4) | 52.0 (33.4-70.0) | 12.6 (7.2-18.7)  | 19.6 (12.8-26.8) | 13.3 (7.9-19.5)  | 3.5 (-1.4-8.4)  | 0.6              |
|                 | Upper-middle |                                  |                  |                  |                  |                  |                  |                 |                  |
|                 |              | American Samoa                   | 42.5 (30.8-55.1) | 33.4 (23.2-45.5) | 8.6 (4.9-12.9)   | 13.6 (9.3-18.5)  | 9.2 (5.8-13.3)   | -1.1 (-4.6-2.2) | 0.0 <sup>e</sup> |
|                 |              | China                            | 87.8 (82.7-91.5) | 83.0 (76.5-88.0) | 18.8 (13.0-24.6) | 28.1 (23.1-33.0) | 19.1 (13.5-24.5) | 10.3 (7.0-13.8) | 431.9            |
|                 |              | Cook Islands                     | 72.8 (63.8-80.3) | 64.5 (54.5-73.5) | 15.3 (10.3-20.4) | 23.3 (18.5-28.2) | 15.9 (11.1-20.8) | 6.4 (3.6-9.5)   | 0.0 <sup>e</sup> |
|                 |              | Fiji                             | 75.9 (67.8-82.5) | 68.2 (58.9-76.2) | 16.0 (10.8-21.3) | 24.2 (19.5-29.1) | 16.6 (11.6-21.5) | 7.2 (4.3-10.4)  | 0.3              |
|                 |              | Malaysia                         | 57.2 (46.5-67.3) | 47.6 (37.1-58.3) | 11.7 (7.5-16.3)  | 18.3 (13.8-23.1) | 12.5 (8.4-16.9)  | 2.4 (-0.3-5.4)  | 3.7              |
|                 |              | Marshall Islands                 | 50.0 (39.2-60.7) | 40.5 (30.5-51.2) | 10.2 (6.3-14.5)  | 16.0 (11.7-20.5) | 10.9 (7.2-15.0)  | 0.7 (-2.0-3.5)  | 0.0 <sup>e</sup> |
|                 |              | Nauru                            | 50.6 (38.7-62.4) | 41.0 (30.0-53.0) | 10.3 (6.3-14.7)  | 16.2 (11.6-21.3) | 11.1 (7.2-15.5)  | 0.9 (-2.2-3.9)  | 0.0 <sup>e</sup> |
|                 |              | Samoa                            | 82.8 (75.8-88.1) | 76.6 (68.0-83.4) | 17.6 (12.1-23.1) | 26.5 (21.5-31.6) | 18.1 (12.9-23.3) | 9.0 (5.8-12.3)  | 0.0              |
|                 |              | Tonga                            | 74.1 (65.2-81.4) | 66.0 (56.0-74.8) | 15.6 (10.6-20.9) | 23.7 (18.9-28.5) | 16.2 (11.1-21.1) | 6.7 (3.9-10.0)  | 0.0              |
|                 |              | Tuvalu                           | 62.8 (53.0-71.7) | 53.4 (43.4-63.3) | 13.0 (8.6-17.8)  | 20.0 (15.5-24.8) | 13.8 (9.4-18.3)  | 3.8 (1.3-6.7)   | 0.0 <sup>e</sup> |
|                 | Lower-middle |                                  |                  |                  |                  |                  |                  |                 |                  |
|                 |              | Cambodia                         | 88.9 (83.2-92.8) | 84.5 (77.1-89.8) | 19.1 (13.3-24.7) | 28.4 (23.3-33.4) | 19.4 (13.8-25.0) | 10.6 (7.2-14.0) | 4.9              |
|                 |              | Federated States of Micronesia   | 67.1 (58.4-74.7) | 58.1 (48.8-66.7) | 14.0 (9.3-18.8)  | 21.5 (17.0-26.1) | 14.6 (10.2-19.2) | 4.9 (2.5-7.7)   | 0.0              |
|                 |              | Kiribati                         | 54.2 (43.8-64.2) | 44.6 (34.6-54.9) | 11.1 (7.0-15.6)  | 17.3 (13.0-22.0) | 11.9 (7.9-16.2)  | 1.7 (-1.0-4.6)  | 0.0              |
|                 |              | Lao People's Democratic Republic | 79.4 (73.1-85.6) | 72.4 (64.9-80.2) | 16.8 (11.5-22.0) | 25.4 (20.6-30.1) | 17.3 (12.2-22.3) | 8.1 (5.2-11.1)  | 1.7              |
|                 |              | Mongolia                         | 80.6 (74.2-85.7) | 73.9 (66.2-80.3) | 17.1 (11.8-22.4) | 25.7 (20.9-30.4) | 17.6 (12.3-22.7) | 8.4 (5.5-11.5)  | 0.7              |

|  |  |                  |                  |                  |                  |                  |                  |                 |                  |
|--|--|------------------|------------------|------------------|------------------|------------------|------------------|-----------------|------------------|
|  |  | Niue             | 94.0 (91.2-95.9) | 91.4 (87.6-94.1) | 20.4 (14.5-26.1) | 30.1 (24.8-35.0) | 20.5 (14.5-26.2) | 12.0 (8.5-15.5) | 0.0 <sup>e</sup> |
|  |  | Papua New Guinea | 81.8 (73.1-88.2) | 75.3 (64.9-83.6) | 17.4 (11.9-23.0) | 26.1 (21.0-31.3) | 17.8 (12.5-23.1) | 8.7 (5.5-12.3)  | 2.1              |
|  |  | Philippines      | 50.9 (40.9-60.9) | 41.3 (32.0-51.4) | 10.4 (6.5-14.7)  | 16.3 (12.2-20.8) | 11.1 (7.4-15.1)  | 0.9 (-1.7-3.7)  | 14.2             |
|  |  | Solomon Islands  | 76.8 (68.5-83.5) | 69.2 (59.6-77.5) | 16.2 (11.1-21.5) | 24.6 (19.8-29.4) | 16.7 (11.7-21.7) | 7.4 (4.5-10.7)  | 0.1              |
|  |  | Tokelau          | 82.3 (74.6-88.1) | 76.0 (66.6-83.4) | 17.5 (12.1-23.0) | 26.3 (21.3-31.3) | 17.9 (12.6-23.3) | 8.9 (5.7-12.3)  | 0.0 <sup>e</sup> |
|  |  | Vanuatu          | 91.2 (87.2-94.1) | 87.6 (82.2-91.6) | 19.7 (14.0-25.4) | 29.2 (24.1-34.1) | 19.9 (14.1-25.4) | 11.2 (7.9-14.7) | 0.1              |
|  |  | Viet Nam         | 69.4 (60.4-77.2) | 60.7 (50.9-69.7) | 14.5 (9.7-19.5)  | 22.2 (17.5-27.1) | 15.1 (10.4-19.9) | 5.5 (2.8-8.6)   | 12.0             |

**Appendix 13B. The Prevented Fractions for the Population and corresponding number of deaths averted for men, by country, region and income group.**

| World Health Organization region | World Bank income group classification | Country      | Prevalence of activity (95% confidence intervals) | Prevalence of activity amongst those that died (95% confidence intervals) | Prevented Fractions for the Population (95% confidence intervals) |                                                               |                                                                       |                                                              |                                                                  |
|----------------------------------|----------------------------------------|--------------|---------------------------------------------------|---------------------------------------------------------------------------|-------------------------------------------------------------------|---------------------------------------------------------------|-----------------------------------------------------------------------|--------------------------------------------------------------|------------------------------------------------------------------|
|                                  |                                        |              |                                                   |                                                                           | Main adjusted estimate (0% activity counterfactual) <sup>a</sup>  | Unadjusted estimate (0% activity counterfactual) <sup>b</sup> | Partially adjusted estimate (0% activity counterfactual) <sup>c</sup> | Adjusted estimate (54.3% active counterfactual) <sup>d</sup> | Number of deaths averted between ages of 40-74 years (thousands) |
| Africa                           |                                        |              |                                                   |                                                                           |                                                                   |                                                               |                                                                       |                                                              |                                                                  |
|                                  | High                                   |              |                                                   |                                                                           |                                                                   |                                                               |                                                                       |                                                              |                                                                  |
|                                  |                                        | Seychelles   | 82.3 (76.7-86.8)                                  | 76.0 (69.1-81.7)                                                          | 17.5 (12.1-22.8)                                                  | 26.4 (21.6-31.1)                                              | 17.9 (12.5-23.0)                                                      | 5.9 (3.7-8.4)                                                | 0.1                                                              |
|                                  | Upper-middle                           |              |                                                   |                                                                           |                                                                   |                                                               |                                                                       |                                                              |                                                                  |
|                                  |                                        | Algeria      | 73.1 (64.9-80.0)                                  | 64.9 (55.7-73.1)                                                          | 15.4 (10.3-20.6)                                                  | 23.3 (18.6-28.1)                                              | 15.9 (11.2-20.7)                                                      | 3.5 (1.2-6.0)                                                | 6.6                                                              |
|                                  |                                        | Botswana     | 82.9 (78.3-86.7)                                  | 76.7 (71.0-81.6)                                                          | 17.6 (12.3-23.0)                                                  | 26.5 (21.8-31.0)                                              | 18.2 (12.9-23.3)                                                      | 6.1 (4.0-8.4)                                                | 0.9                                                              |
|                                  |                                        | Gabon        | 82.3 (75.8-87.4)                                  | 76.0 (68.0-82.5)                                                          | 17.5 (12.0-23.0)                                                  | 26.3 (21.4-31.2)                                              | 18.0 (12.7-23.1)                                                      | 5.9 (3.5-8.5)                                                | 0.6                                                              |
|                                  |                                        | Mauritius    | 72.4 (64.9-78.8)                                  | 64.1 (55.7-71.6)                                                          | 15.1 (10.3-20.1)                                                  | 23.1 (18.6-27.8)                                              | 15.8 (11.1-20.6)                                                      | 3.3 (1.2-5.6)                                                | 0.6                                                              |
|                                  |                                        | Namibia      | 71.1 (64.4-77.0)                                  | 62.6 (55.2-69.5)                                                          | 14.9 (10.2-19.7)                                                  | 22.7 (18.4-27.1)                                              | 15.5 (10.7-20.2)                                                      | 3.0 (1.1-5.0)                                                | 0.7                                                              |
|                                  |                                        | South Africa | 71.5 (64.1-78.0)                                  | 63.0 (54.8-70.7)                                                          | 15.0 (10.3-19.8)                                                  | 22.8 (18.4-27.3)                                              | 15.6 (10.9-20.2)                                                      | 3.1 (1.0-5.3)                                                | 31.2                                                             |
|                                  | Lower-middle                           |              |                                                   |                                                                           |                                                                   |                                                               |                                                                       |                                                              |                                                                  |
|                                  |                                        | Cabo Verde   | 85.9 (81.6-89.4)                                  | 80.5 (75.1-85.1)                                                          | 18.4 (12.7-23.9)                                                  | 27.5 (22.6-32.1)                                              | 18.8 (13.4-24.0)                                                      | 6.9 (4.6-9.3)                                                | 0.1                                                              |
|                                  |                                        | Cameroon     | 78.2 (72.6-83.0)                                  | 70.9 (64.3-76.8)                                                          | 16.5 (11.4-21.5)                                                  | 25.0 (20.5-29.4)                                              | 17.1 (12.0-22.0)                                                      | 4.8 (2.9-7.0)                                                | 6.6                                                              |

|  |     |                                  |                  |                  |                  |                  |                  |                |      |
|--|-----|----------------------------------|------------------|------------------|------------------|------------------|------------------|----------------|------|
|  |     | Congo                            | 75.2 (68.3-81.1) | 67.3 (59.4-74.5) | 15.8 (10.8-20.9) | 24.1 (19.5-28.7) | 16.4 (11.4-21.2) | 4.0 (2.0-6.3)  | 1.2  |
|  |     | Côte d'Ivoire                    | 70.9 (65.5-76.4) | 62.4 (56.3-68.8) | 14.9 (10.1-19.7) | 22.7 (18.5-26.9) | 15.5 (11.0-19.9) | 2.9 (1.3-4.8)  | 8.6  |
|  |     | Eswatini                         | 76.2 (72.7-79.8) | 68.5 (64.4-72.9) | 16.1 (11.2-20.9) | 24.3 (20.1-28.5) | 16.6 (11.8-21.2) | 4.3 (2.7-6.0)  | 0.5  |
|  |     | Ghana                            | 81.4 (77.4-85.4) | 74.8 (70.0-79.9) | 17.3 (11.9-22.3) | 26.0 (21.4-30.5) | 17.8 (12.6-22.8) | 5.7 (3.7-7.8)  | 8.1  |
|  |     | Kenya                            | 86.1 (84.0-88.2) | 80.8 (78.1-83.6) | 18.4 (12.9-23.8) | 27.5 (22.8-32.1) | 18.7 (13.1-24.0) | 7.0 (4.8-9.1)  | 10.2 |
|  |     | Lesotho                          | 93.5 (91.3-95.1) | 90.7 (87.7-93.0) | 20.3 (14.3-25.9) | 29.9 (24.8-34.7) | 20.4 (14.4-26.1) | 9.1 (6.4-11.6) | 1.4  |
|  |     | Mauritania                       | 63.5 (56.1-70.8) | 54.2 (46.5-62.2) | 13.2 (8.9-17.8)  | 20.3 (16.3-24.5) | 13.8 (9.6-18.1)  | 1.0 (-1.1-3.1) | 0.7  |
|  |     | Nigeria                          | 75.3 (69.2-80.5) | 67.5 (60.4-73.7) | 15.9 (11.0-21.0) | 24.1 (19.6-28.4) | 16.4 (11.6-21.1) | 4.1 (2.2-6.2)  | 59.8 |
|  |     | São Tomé and Príncipe            | 90.2 (87.0-92.7) | 86.2 (82.0-89.6) | 19.5 (13.7-25.1) | 28.9 (23.7-33.7) | 19.7 (14.2-25.2) | 8.1 (5.6-10.7) | 0.0  |
|  |     | Zambia                           | 80.9 (76.7-85.2) | 74.2 (69.1-79.6) | 17.2 (11.9-22.3) | 25.9 (21.3-30.3) | 17.7 (12.3-22.7) | 5.6 (3.6-7.7)  | 3.5  |
|  | Low |                                  |                  |                  |                  |                  |                  |                |      |
|  |     | Benin                            | 86.4 (82.5-89.5) | 81.2 (76.2-85.3) | 18.5 (13.0-23.9) | 27.6 (22.6-32.3) | 18.9 (13.2-24.2) | 7.1 (4.8-9.4)  | 2.7  |
|  |     | Burkina Faso                     | 82.3 (77.6-86.9) | 76.0 (70.2-81.8) | 17.5 (12.2-22.8) | 26.3 (21.6-31.0) | 17.9 (12.7-23.0) | 6.0 (3.8-8.3)  | 3.9  |
|  |     | Central African Republic         | 87.4 (83.7-90.3) | 82.5 (77.7-86.4) | 18.7 (13.2-24.1) | 27.9 (23.0-32.6) | 19.1 (13.6-24.2) | 7.3 (5.0-9.7)  | 2.2  |
|  |     | Chad                             | 80.4 (74.4-86.4) | 73.6 (66.4-81.2) | 17.1 (11.7-22.4) | 25.7 (20.9-30.5) | 17.5 (12.4-22.6) | 5.4 (3.2-8.0)  | 3.7  |
|  |     | Comoros                          | 90.4 (88.1-92.6) | 86.5 (83.4-89.5) | 19.5 (13.7-25.1) | 28.9 (23.7-33.5) | 19.7 (14.0-25.1) | 8.2 (5.7-10.6) | 0.2  |
|  |     | Democratic Republic of the Congo | 79.2 (73.5-83.9) | 72.1 (65.3-78.0) | 16.8 (11.6-21.8) | 25.3 (20.7-30.0) | 17.3 (12.1-22.2) | 5.1 (3.1-7.3)  | 18.1 |
|  |     | Eritrea                          | 86.2 (84.1-88.4) | 80.9 (78.2-83.8) | 18.4 (12.9-23.8) | 27.5 (22.8-32.1) | 18.8 (13.3-24.0) | 7.0 (4.8-9.2)  | 1.7  |
|  |     | Ethiopia                         | 88.7 (86.8-90.5) | 84.2 (81.7-86.6) | 19.0 (13.4-24.4) | 28.4 (23.6-33.0) | 19.3 (13.8-24.5) | 7.7 (5.4-10.0) | 25.7 |
|  |     | Gambia                           | 84.0 (79.1-88.0) | 78.1 (72.0-83.3) | 17.9 (12.6-23.1) | 26.9 (22.0-31.5) | 18.4 (13.2-23.6) | 6.4 (4.2-8.8)  | 0.5  |
|  |     | Guinea                           | 89.4 (85.8-92.1) | 85.1 (80.4-88.8) | 19.2 (13.5-24.8) | 28.5 (23.6-33.3) | 19.5 (13.9-25.0) | 7.9 (5.4-10.4) | 4.3  |
|  |     | Liberia                          | 78.3 (72.8-82.9) | 71.0 (64.5-76.7) | 16.6 (11.5-21.7) | 25.0 (20.5-29.6) | 17.1 (12.1-22.0) | 4.9 (3.0-7.1)  | 1.2  |
|  |     | Madagascar                       | 87.2 (83.4-90.2) | 82.2 (77.4-86.2) | 18.7 (13.0-23.9) | 27.9 (23.1-32.5) | 19.0 (13.4-24.2) | 7.3 (5.0-9.7)  | 6.5  |
|  |     | Malawi                           | 87.0 (85.3-88.7) | 82.0 (79.8-84.2) | 18.7 (13.2-24.0) | 27.8 (22.9-32.3) | 19.0 (13.5-24.2) | 7.3 (5.1-9.4)  | 5.0  |
|  |     | Mali                             | 66.3 (60.2-72.4) | 57.2 (50.7-64.1) | 13.8 (9.4-18.3)  | 21.2 (17.1-25.4) | 14.5 (10.1-18.8) | 1.7 (0.0-3.6)  | 2.9  |
|  |     | Mozambique                       | 95.0 (93.2-96.3) | 92.8 (90.3-94.7) | 20.6 (14.6-26.3) | 30.4 (25.2-35.3) | 20.7 (14.7-26.3) | 9.4 (6.7-12.1) | 10.1 |
|  |     | Niger                            | 80.3 (73.5-85.7) | 73.5 (65.3-80.3) | 17.0 (11.8-22.4) | 25.7 (20.9-30.5) | 17.5 (12.4-22.6) | 5.4 (3.1-8.0)  | 4.8  |

|          |              |                                  |                  |                  |                  |                  |                  |                |                  |
|----------|--------------|----------------------------------|------------------|------------------|------------------|------------------|------------------|----------------|------------------|
|          |              | Rwanda                           | 89.0 (85.5-91.7) | 84.6 (80.0-88.2) | 19.1 (13.4-24.7) | 28.5 (23.4-33.2) | 19.4 (13.8-24.8) | 7.8 (5.3-10.3) | 2.6              |
|          |              | Senegal                          | 82.4 (79.6-85.3) | 76.1 (72.6-79.8) | 17.5 (12.3-22.7) | 26.4 (21.8-30.7) | 18.0 (12.8-22.9) | 6.0 (4.1-8.0)  | 3.2              |
|          |              | Sierra Leone                     | 89.9 (86.5-92.4) | 85.8 (81.3-89.2) | 19.3 (13.6-24.8) | 28.7 (23.6-33.5) | 19.5 (13.7-25.1) | 8.0 (5.6-10.5) | 3.1              |
|          |              | Togo                             | 90.8 (88.0-93.0) | 87.0 (83.3-90.0) | 19.6 (13.9-25.3) | 29.0 (24.0-33.8) | 19.8 (14.0-25.2) | 8.3 (5.8-10.9) | 2.5              |
|          |              | Uganda                           | 94.8 (92.9-96.2) | 92.5 (89.9-94.5) | 20.6 (14.7-26.3) | 30.3 (25.1-35.3) | 20.7 (14.6-26.4) | 9.4 (6.7-12.1) | 10.2             |
|          |              | United Republic of Tanzania      | 94.2 (92.3-95.7) | 91.7 (89.1-93.8) | 20.4 (14.4-26.2) | 30.1 (24.9-35.1) | 20.6 (14.6-26.2) | 9.2 (6.5-11.9) | 15.9             |
|          |              | Zimbabwe                         | 77.2 (70.5-82.8) | 69.7 (61.9-76.6) | 16.3 (11.2-21.5) | 24.7 (20.0-29.3) | 16.9 (11.8-21.6) | 4.6 (2.5-6.9)  | 4.2              |
| Americas |              |                                  |                  |                  |                  |                  |                  |                |                  |
|          | High         |                                  |                  |                  |                  |                  |                  |                |                  |
|          |              | Argentina                        | 62.4 (54.5-69.6) | 53.0 (44.9-60.9) | 12.9 (8.6-17.4)  | 20.0 (15.8-24.2) | 13.6 (9.4-17.8)  | 0.7 (-1.4-2.7) | 12.1             |
|          |              | Bahamas                          | 70.0 (61.9-77.0) | 61.3 (52.5-69.5) | 14.6 (9.8-19.5)  | 22.4 (17.8-27.0) | 15.3 (10.6-19.9) | 2.7 (0.5-5.1)  | 0.1              |
|          |              | Barbados                         | 70.7 (62.7-78.7) | 62.1 (53.3-71.5) | 14.8 (10.0-19.9) | 22.6 (18.0-27.2) | 15.4 (10.7-20.2) | 2.9 (0.5-5.5)  | 0.1              |
|          |              | Bermuda                          | 79.7 (72.7-85.3) | 72.7 (64.4-79.8) | 16.8 (11.6-22.1) | 25.5 (20.7-30.4) | 17.4 (12.2-22.5) | 5.2 (2.9-7.8)  | 0.0 <sup>e</sup> |
|          |              | British Virgin Islands           | 80.9 (74.8-85.9) | 74.2 (66.9-80.5) | 17.2 (11.9-22.5) | 25.8 (21.1-30.5) | 17.6 (12.4-22.7) | 5.6 (3.4-8.0)  | 0.0 <sup>e</sup> |
|          |              | Canada                           | 74.3 (67.2-80.3) | 66.3 (58.2-73.5) | 15.6 (10.7-20.6) | 23.8 (19.3-28.4) | 16.2 (11.3-21.1) | 3.8 (1.7-6.1)  | 9.4              |
|          |              | Cayman Islands                   | 79.8 (73.0-85.3) | 72.9 (64.8-79.8) | 16.9 (11.5-22.2) | 25.5 (20.7-30.3) | 17.4 (12.2-22.5) | 5.3 (3.0-7.8)  | 0.0 <sup>e</sup> |
|          |              | Chile                            | 75.6 (69.4-81.8) | 67.8 (60.7-75.3) | 15.9 (11.0-20.9) | 24.2 (19.6-28.7) | 16.5 (11.7-21.3) | 4.1 (2.1-6.4)  | 5.0              |
|          |              | Saint Kitts and Nevis            | 75.9 (68.1-82.2) | 68.2 (59.2-75.8) | 16.0 (10.9-21.2) | 24.3 (19.5-29.1) | 16.6 (11.6-21.4) | 4.2 (1.9-6.8)  | 0.0 <sup>e</sup> |
|          |              | Trinidad and Tobago              | 72.8 (62.5-81.1) | 64.5 (53.1-74.5) | 15.3 (10.2-20.6) | 23.3 (18.2-28.4) | 15.9 (10.8-21.0) | 3.4 (0.5-6.5)  | 0.7              |
|          |              | United States of America         | 68.3 (61.7-74.2) | 59.4 (52.3-66.2) | 14.3 (9.7-19.0)  | 21.8 (17.7-26.2) | 14.9 (10.3-19.4) | 2.2 (0.5-4.2)  | 97.9             |
|          |              | Uruguay                          | 81.3 (75.7-85.8) | 74.7 (67.9-80.4) | 17.3 (11.9-22.6) | 26.0 (21.3-30.7) | 17.7 (12.4-22.8) | 5.7 (3.5-8.0)  | 1.5              |
|          | Upper-middle |                                  |                  |                  |                  |                  |                  |                |                  |
|          |              | Bolivarian Republic of Venezuela | 68.6 (60.0-76.0) | 59.8 (50.5-68.3) | 14.3 (9.6-19.2)  | 22.0 (17.5-26.6) | 15.0 (10.3-19.7) | 2.3 (0.0-4.8)  | 7.8              |
|          |              | Brazil                           | 59.6 (51.5-67.2) | 50.1 (41.9-58.2) | 12.3 (8.2-16.6)  | 19.0 (14.9-23.2) | 13.0 (9.0-17.1)  | 0.0 (-2.2-2.1) | 49.6             |
|          |              | Colombia                         | 61.2 (53.0-69.5) | 51.7 (43.4-60.8) | 12.7 (8.4-17.2)  | 19.6 (15.4-23.9) | 13.4 (9.2-17.6)  | 0.4 (-2.0-2.7) | 9.9              |
|          |              | Costa Rica                       | 62.3 (54.3-69.7) | 52.9 (44.7-61.0) | 12.9 (8.6-17.4)  | 19.9 (15.9-24.2) | 13.6 (9.4-17.9)  | 0.6 (-1.5-2.8) | 0.9              |
|          |              | Cuba                             | 69.1 (61.3-75.9) | 60.3 (51.8-68.2) | 14.4 (9.8-19.3)  | 22.1 (17.7-26.7) | 15.1 (10.5-19.7) | 2.4 (0.3-4.7)  | 3.6              |

|                       |              |                          |                  |                  |                  |                  |                  |                  |                  |
|-----------------------|--------------|--------------------------|------------------|------------------|------------------|------------------|------------------|------------------|------------------|
|                       |              | Dominica                 | 86.6 (82.0-90.1) | 81.5 (75.6-86.1) | 18.5 (13.0-24.0) | 27.7 (22.8-32.5) | 18.9 (13.4-24.3) | 7.1 (4.8-9.6)    | 0.0 <sup>e</sup> |
|                       |              | Dominican Republic       | 65.6 (57.4-72.9) | 56.5 (47.8-64.6) | 13.6 (9.1-18.5)  | 21.0 (16.6-25.5) | 14.3 (9.9-18.9)  | 1.5 (-0.6-3.8)   | 2.5              |
|                       |              | Ecuador                  | 75.4 (68.9-81.9) | 67.6 (60.1-75.5) | 15.9 (10.8-21.0) | 24.1 (19.5-28.8) | 16.5 (11.6-21.4) | 4.1 (2.0-6.5)    | 3.3              |
|                       |              | Grenada                  | 78.1 (70.9-84.0) | 70.8 (62.4-78.1) | 16.5 (11.3-21.8) | 24.9 (20.1-29.6) | 17.1 (12.0-22.0) | 4.8 (2.5-7.4)    | 0.0              |
|                       |              | Guatemala                | 62.9 (53.3-71.6) | 53.5 (43.7-63.2) | 13.0 (8.4-17.7)  | 20.1 (15.5-24.9) | 13.7 (9.4-18.2)  | 0.8 (-1.8-3.3)   | 2.1              |
|                       |              | Jamaica                  | 71.6 (64.1-78.1) | 63.2 (54.8-70.8) | 15.0 (10.2-19.9) | 22.9 (18.2-27.6) | 15.6 (11.0-20.4) | 3.1 (1.0-5.4)    | 0.7              |
|                       |              | Mexico                   | 74.5 (68.6-79.7) | 66.5 (59.8-72.7) | 15.7 (10.9-20.6) | 23.8 (19.4-28.3) | 16.3 (11.5-20.9) | 3.8 (2.0-5.9)    | 25.2             |
|                       |              | Paraguay                 | 61.9 (53.5-70.4) | 52.5 (43.9-61.8) | 12.8 (8.5-17.5)  | 19.8 (15.5-24.2) | 13.5 (9.2-17.8)  | 0.5 (-1.9-3.0)   | 1.2              |
|                       |              | Saint Lucia              | 73.4 (64.4-80.8) | 65.2 (55.2-74.1) | 15.4 (10.5-20.5) | 23.5 (18.6-28.4) | 16.0 (11.1-20.9) | 3.6 (1.0-6.3)    | 0.1              |
|                       |              | Suriname                 | 61.9 (53.9-69.2) | 52.5 (44.3-60.4) | 12.8 (8.6-17.2)  | 19.8 (15.7-24.1) | 13.6 (9.4-17.9)  | 0.6 (-1.6-2.7)   | 0.2              |
| Eastern Mediterranean |              |                          |                  |                  |                  |                  |                  |                  |                  |
|                       | High         |                          |                  |                  |                  |                  |                  |                  |                  |
|                       |              | Kuwait                   | 38.7 (30.8-47.2) | 30.0 (23.2-37.8) | 7.8 (4.8-11.1)   | 12.4 (9.1-16.1)  | 8.4 (5.5-11.5)   | -5.2 (-8.3--2.7) | 0.3              |
|                       |              | Oman                     | 70.0 (61.6-77.2) | 61.3 (52.2-69.7) | 14.7 (9.9-19.6)  | 22.4 (17.9-27.0) | 15.3 (10.6-20.0) | 2.7 (0.4-5.1)    | 0.5              |
|                       |              | Qatar                    | 66.8 (57.7-74.9) | 57.8 (48.1-67.0) | 13.9 (9.3-18.8)  | 21.3 (16.8-26.1) | 14.6 (10.1-19.2) | 1.8 (-0.6-4.3)   | 0.2              |
|                       |              | Saudi Arabia             | 55.1 (46.6-63.3) | 45.5 (37.2-54.0) | 11.3 (7.4-15.6)  | 17.6 (13.8-21.7) | 12.0 (8.2-16.0)  | -1.2 (-3.6-1.0)  | 4.1              |
|                       | Upper-middle |                          |                  |                  |                  |                  |                  |                  |                  |
|                       |              | United Arab Emirates     | 61.0 (52.6-69.5) | 51.5 (43.0-60.8) | 12.6 (8.3-17.2)  | 19.5 (15.3-23.9) | 13.3 (9.2-17.6)  | 0.3 (-2.1-2.7)   | 0.9              |
|                       |              | Iraq                     | 60.5 (52.8-67.8) | 51.0 (43.2-58.9) | 12.5 (8.4-16.9)  | 19.3 (15.3-23.5) | 13.2 (9.1-17.3)  | 0.2 (-1.8-2.2)   | 5.3              |
|                       |              | Islamic Republic of Iran | 66.8 (58.6-74.1) | 57.8 (49.0-66.0) | 13.9 (9.2-18.7)  | 21.3 (17.0-25.9) | 14.6 (10.2-19.0) | 1.8 (-0.4-4.1)   | 12.5             |
|                       |              | Jordan                   | 89.7 (85.8-92.6) | 85.5 (80.4-89.5) | 19.4 (13.5-24.8) | 28.7 (23.6-33.6) | 19.6 (13.8-25.1) | 8.0 (5.5-10.6)   | 1.9              |
|                       |              | Lebanon                  | 60.2 (51.3-68.5) | 50.7 (41.7-59.6) | 12.4 (8.2-16.9)  | 19.3 (14.9-23.8) | 13.1 (9.0-17.4)  | 0.1 (-2.3-2.5)   | 0.9              |
|                       |              | Libya                    | 68.8 (60.4-76.1) | 60.0 (50.9-68.4) | 14.4 (9.6-19.3)  | 22.0 (17.6-26.6) | 15.0 (10.6-19.5) | 2.3 (0.1-4.8)    | 1.4              |
|                       | Lower-middle |                          |                  |                  |                  |                  |                  |                  |                  |
|                       |              | Egypt                    | 76.8 (69.5-82.7) | 69.2 (60.8-76.5) | 16.2 (11.1-21.3) | 24.6 (19.9-29.2) | 16.8 (11.7-21.7) | 4.5 (2.3-6.9)    | 29.7             |
|                       |              | Morocco                  | 79.3 (71.2-85.5) | 72.3 (62.7-80.0) | 16.8 (11.4-22.2) | 25.4 (20.4-30.3) | 17.3 (12.0-22.3) | 5.1 (2.7-7.9)    | 6.5              |
|                       |              | Pakistan                 | 75.6 (64.9-86.3) | 67.8 (55.7-81.1) | 15.9 (10.5-21.6) | 24.1 (18.6-29.8) | 16.5 (11.3-22.0) | 4.1 (0.6-7.6)    | 46.3             |
|                       |              | Occupied Palestine       | 67.6 (59.6-74.6) | 58.6 (50.1-66.6) | 14.1 (9.5-18.9)  | 21.6 (17.3-26.1) | 14.7 (10.3-19.3) | 2.0 (0.0-4.2)    | 0.6              |



|        |      | Territory   |                  |                  |                  |                  |                  |                |                  |
|--------|------|-------------|------------------|------------------|------------------|------------------|------------------|----------------|------------------|
|        |      | Tunisia     | 73.6 (66.3-79.8) | 65.5 (57.2-72.9) | 15.4 (10.5-20.5) | 23.5 (19.0-28.2) | 16.1 (11.3-20.9) | 3.6 (1.5-6.0)  | 3.2              |
| Europe |      |             |                  |                  |                  |                  |                  |                |                  |
|        | High |             |                  |                  |                  |                  |                  |                |                  |
|        |      | Andorra     | 63.2 (55.4-70.3) | 53.9 (45.8-61.7) | 13.1 (8.7-17.7)  | 20.2 (16.1-24.5) | 13.8 (9.6-18.1)  | 0.9 (-1.2-2.9) | 0.0 <sup>e</sup> |
|        |      | Austria     | 73.6 (67.7-78.8) | 65.5 (58.8-71.6) | 15.5 (10.5-20.4) | 23.5 (19.2-28.0) | 16.0 (11.3-20.7) | 3.6 (1.8-5.7)  | 2.9              |
|        |      | Belgium     | 69.4 (63.2-75.0) | 60.7 (53.9-67.1) | 14.5 (9.9-19.3)  | 22.2 (18.0-26.5) | 15.1 (10.7-19.6) | 2.5 (0.8-4.4)  | 3.4              |
|        |      | Croatia     | 74.1 (67.3-80.0) | 66.0 (58.3-73.1) | 15.6 (10.6-20.6) | 23.7 (19.1-28.4) | 16.2 (11.4-20.9) | 3.7 (1.7-6.0)  | 2.4              |
|        |      | Cyprus      | 61.6 (54.4-68.4) | 52.2 (44.8-59.5) | 12.7 (8.5-17.0)  | 19.7 (15.6-23.9) | 13.4 (9.4-17.6)  | 0.5 (-1.4-2.4) | 0.2              |
|        |      | Czechia     | 71.9 (64.9-78.0) | 63.5 (55.7-70.7) | 15.0 (10.1-19.9) | 23.0 (18.5-27.5) | 15.7 (11.0-20.3) | 3.1 (1.2-5.4)  | 5.0              |
|        |      | Denmark     | 74.3 (68.5-79.3) | 66.3 (59.6-72.3) | 15.6 (10.7-20.6) | 23.7 (19.3-28.1) | 16.2 (11.5-20.8) | 3.8 (2.0-5.8)  | 2.1              |
|        |      | Estonia     | 71.1 (64.2-77.2) | 62.6 (54.9-69.7) | 14.9 (10.1-19.9) | 22.7 (18.5-27.1) | 15.5 (10.9-20.1) | 2.9 (1.0-5.2)  | 0.7              |
|        |      | Finland     | 82.8 (78.5-86.4) | 76.6 (71.3-81.2) | 17.6 (12.2-23.1) | 26.5 (21.7-31.2) | 18.0 (12.7-23.1) | 6.1 (4.0-8.4)  | 2.4              |
|        |      | France      | 75.7 (70.1-80.6) | 67.9 (61.4-73.9) | 16.0 (11.0-21.0) | 24.2 (19.7-28.7) | 16.5 (11.6-21.2) | 4.2 (2.4-6.2)  | 20.8             |
|        |      | Germany     | 59.8 (53.3-66.0) | 50.3 (43.7-56.9) | 12.3 (8.3-16.5)  | 19.1 (15.3-23.0) | 13.1 (9.0-17.0)  | 0.0 (-1.7-1.7) | 24.8             |
|        |      | Greece      | 66.1 (59.5-72.1) | 57.0 (50.0-63.7) | 13.8 (9.4-18.3)  | 21.1 (17.2-25.3) | 14.4 (10.2-18.7) | 1.6 (-0.1-3.5) | 3.3              |
|        |      | Hungary     | 66.9 (59.4-73.6) | 57.9 (49.9-65.5) | 13.9 (9.4-18.6)  | 21.4 (17.2-25.8) | 14.6 (10.3-19.1) | 1.8 (-0.1-4.0) | 5.7              |
|        |      | Ireland     | 71.7 (65.8-77.0) | 63.3 (56.7-69.5) | 15.1 (10.3-19.8) | 22.9 (18.7-27.2) | 15.7 (11.1-20.3) | 3.1 (1.4-5.1)  | 1.1              |
|        |      | Italy       | 63.8 (57.1-70.1) | 54.5 (47.5-61.4) | 13.3 (8.9-17.8)  | 20.4 (16.4-24.5) | 14.0 (9.9-18.2)  | 1.1 (-0.7-2.9) | 14.7             |
|        |      | Latvia      | 74.6 (67.9-80.4) | 66.6 (59.0-73.6) | 15.7 (10.8-20.7) | 23.9 (19.3-28.5) | 16.2 (11.2-21.1) | 3.9 (1.9-6.1)  | 1.5              |
|        |      | Lithuania   | 76.8 (70.7-82.0) | 69.2 (62.1-75.6) | 16.2 (11.2-21.3) | 24.6 (20.0-29.1) | 16.7 (11.8-21.6) | 4.5 (2.5-6.7)  | 2.3              |
|        |      | Luxembourg  | 73.6 (67.7-78.7) | 65.5 (58.8-71.5) | 15.5 (10.7-20.5) | 23.5 (19.1-27.9) | 16.0 (11.3-20.7) | 3.6 (1.8-5.7)  | 0.1              |
|        |      | Malta       | 63.8 (55.8-71.1) | 54.5 (46.2-62.6) | 13.2 (8.7-17.8)  | 20.4 (16.2-24.8) | 13.9 (9.7-18.2)  | 1.0 (-1.1-3.2) | 0.1              |
|        |      | Netherlands | 74.7 (69.0-79.7) | 66.7 (60.2-72.7) | 15.7 (10.7-20.6) | 23.9 (19.3-28.2) | 16.3 (11.4-21.1) | 3.9 (2.1-5.9)  | 5.0              |
|        |      | Norway      | 70.4 (64.0-76.1) | 61.8 (54.7-68.4) | 14.8 (10.1-19.5) | 22.5 (18.2-26.9) | 15.4 (10.8-19.8) | 2.8 (1.0-4.8)  | 1.2              |
|        |      | Poland      | 68.5 (61.0-75.2) | 59.6 (51.5-67.3) | 14.3 (9.6-19.0)  | 21.9 (17.5-26.3) | 15.0 (10.4-19.5) | 2.3 (0.3-4.4)  | 18.2             |
|        |      | Portugal    | 62.5 (54.0-70.2) | 53.1 (44.4-61.6) | 12.9 (8.7-17.5)  | 20.0 (15.7-24.5) | 13.6 (9.4-18.0)  | 0.7 (-1.6-3.0) | 3.1              |
|        |      | Slovakia    | 68.9 (61.5-75.4) | 60.1 (52.1-67.6) | 14.4 (9.7-19.2)  | 22.0 (17.7-26.4) | 15.0 (10.4-19.6) | 2.4 (0.4-4.5)  | 2.6              |
|        |      | Slovenia    | 72.3 (65.4-78.3) | 64.0 (56.2-71.0) | 15.1 (10.3-20.0) | 23.1 (18.7-27.6) | 15.8 (11.1-20.4) | 3.3 (1.3-5.5)  | 0.8              |

|                 |              |                        |                  |                  |                  |                  |                  |                |       |
|-----------------|--------------|------------------------|------------------|------------------|------------------|------------------|------------------|----------------|-------|
|                 |              | Spain                  | 77.1 (71.5-81.9) | 69.6 (63.0-75.5) | 16.3 (11.1-21.4) | 24.6 (20.2-29.1) | 16.8 (11.8-21.7) | 4.6 (2.6-6.7)  | 14.1  |
|                 |              | Sweden                 | 78.5 (73.4-82.9) | 71.3 (65.2-76.7) | 16.6 (11.5-21.6) | 25.1 (20.4-29.6) | 17.2 (12.1-22.1) | 4.9 (3.0-7.0)  | 2.9   |
|                 |              | Switzerland            | 78.3 (72.2-83.3) | 71.0 (63.8-77.2) | 16.6 (11.4-21.6) | 25.0 (20.3-29.6) | 17.1 (12.1-21.9) | 4.9 (2.8-7.1)  | 2.2   |
|                 |              | United Kingdom         | 68.5 (62.2-74.2) | 59.6 (52.8-66.2) | 14.3 (9.7-18.9)  | 21.9 (17.8-26.1) | 15.0 (10.5-19.4) | 2.3 (0.6-4.1)  | 17.1  |
|                 | Upper-middle |                        |                  |                  |                  |                  |                  |                |       |
|                 |              | Armenia                | 76.7 (69.3-82.7) | 69.1 (60.5-76.5) | 16.2 (11.1-21.3) | 24.5 (19.9-29.3) | 16.7 (11.8-21.7) | 4.4 (2.2-7.0)  | 1.4   |
|                 |              | Belarus                | 86.3 (81.3-90.2) | 81.1 (74.7-86.2) | 18.5 (12.9-24.0) | 27.6 (22.7-32.4) | 18.8 (13.3-24.2) | 7.0 (4.6-9.6)  | 9.0   |
|                 |              | Bosnia and Herzegovina | 77.2 (69.7-83.3) | 69.7 (61.0-77.2) | 16.3 (11.0-21.5) | 24.7 (19.9-29.6) | 16.8 (11.8-21.9) | 4.6 (2.2-7.2)  | 1.9   |
|                 |              | Bulgaria               | 64.4 (56.4-71.7) | 55.2 (46.8-63.3) | 13.3 (8.8-17.9)  | 20.6 (16.3-25.0) | 14.1 (9.8-18.5)  | 1.2 (-1.0-3.4) | 4.4   |
|                 |              | Kazakhstan             | 73.9 (65.6-80.8) | 65.8 (56.5-74.1) | 15.6 (10.6-20.7) | 23.6 (18.8-28.4) | 16.1 (11.2-21.1) | 3.7 (1.4-6.2)  | 9.0   |
|                 |              | Romania                | 67.9 (60.3-74.7) | 59.0 (50.8-66.7) | 14.2 (9.5-19.0)  | 21.8 (17.4-26.2) | 14.8 (10.3-19.4) | 2.1 (0.1-4.3)  | 11.1  |
|                 |              | Russian Federation     | 83.4 (79.3-87.6) | 77.4 (72.3-82.8) | 17.7 (12.3-23.0) | 26.7 (21.9-31.4) | 18.2 (12.8-23.2) | 6.2 (4.1-8.5)  | 127.3 |
|                 |              | Serbia                 | 65.2 (56.5-73.0) | 56.0 (46.9-64.8) | 13.6 (9.0-18.3)  | 20.8 (16.5-25.4) | 14.2 (9.8-18.6)  | 1.4 (-0.9-3.8) | 4.5   |
|                 |              | Turkey                 | 78.3 (71.6-83.7) | 71.0 (63.2-77.7) | 16.6 (11.4-21.8) | 25.0 (20.3-29.7) | 17.1 (12.0-22.0) | 4.9 (2.7-7.3)  | 21.1  |
|                 | Lower-middle |                        |                  |                  |                  |                  |                  |                |       |
|                 |              | Georgia                | 82.7 (76.9-87.4) | 76.5 (69.4-82.5) | 17.6 (12.3-22.9) | 26.5 (21.7-31.2) | 18.0 (12.7-23.2) | 6.0 (3.8-8.5)  | 3.0   |
|                 |              | Kyrgyzstan             | 89.1 (84.0-92.8) | 84.7 (78.1-89.8) | 19.1 (13.1-24.6) | 28.5 (23.4-33.4) | 19.4 (13.7-25.0) | 7.8 (5.1-10.5) | 2.4   |
|                 |              | Republic of Moldova    | 87.9 (83.3-91.3) | 83.2 (77.2-87.7) | 18.9 (13.2-24.4) | 28.1 (23.0-32.9) | 19.2 (13.6-24.5) | 7.5 (5.0-10.0) | 3.4   |
|                 |              | Ukraine                | 81.3 (75.1-86.3) | 74.7 (67.2-81.1) | 17.3 (11.9-22.7) | 26.0 (21.2-30.8) | 17.7 (12.5-23.0) | 5.7 (3.5-8.2)  | 40.8  |
|                 |              | Uzbekistan             | 86.7 (81.1-90.8) | 81.6 (74.5-87.0) | 18.6 (13.1-24.1) | 27.7 (22.7-32.7) | 18.9 (13.3-24.3) | 7.1 (4.7-9.8)  | 10.5  |
|                 | Low          |                        |                  |                  |                  |                  |                  |                |       |
|                 |              | Tajikistan             | 80.1 (72.4-86.0) | 73.2 (64.1-80.7) | 17.0 (11.7-22.3) | 25.6 (20.7-30.6) | 17.5 (12.2-22.8) | 5.3 (3.0-8.0)  | 2.0   |
| South-East Asia |              |                        |                  |                  |                  |                  |                  |                |       |
|                 | Upper-middle |                        |                  |                  |                  |                  |                  |                |       |
|                 |              | Maldives               | 74.2 (65.4-81.5) | 66.2 (56.2-75.0) | 15.6 (10.6-20.8) | 23.7 (18.8-28.6) | 16.2 (11.3-21.2) | 3.8 (1.2-6.5)  | 0.1   |
|                 |              | Thailand               | 78.2 (71.5-83.7) | 70.9 (63.0-77.7) | 16.5 (11.5-21.8) | 25.0 (20.3-29.7) | 17.1 (12.1-22.0) | 4.8 (2.7-7.3)  | 30.4  |
|                 | Lower-middle |                        |                  |                  |                  |                  |                  |                |       |
|                 |              | Bangladesh             | 83.9 (77.5-90.3) | 78.0 (70.1-86.4) | 17.9 (12.4-23.5) | 26.9 (21.8-31.9) | 18.3 (12.8-23.7) | 6.4 (3.8-9.2)  | 49.1  |

|                 |              |                   |                  |                  |                  |                  |                  |                 |                  |
|-----------------|--------------|-------------------|------------------|------------------|------------------|------------------|------------------|-----------------|------------------|
|                 |              | Bhutan            | 82.3 (79.4-85.2) | 76.0 (72.4-79.6) | 17.5 (12.1-22.8) | 26.3 (21.8-30.7) | 17.9 (12.7-23.0) | 6.0 (4.0-8.0)   | 0.2              |
|                 |              | India             | 75.3 (63.7-84.2) | 67.5 (54.4-78.4) | 15.9 (10.4-21.4) | 24.1 (18.6-29.7) | 16.5 (11.2-22.0) | 4.1 (0.8-7.4)   | 485.0            |
|                 |              | Indonesia         | 76.5 (68.4-83.1) | 68.9 (59.5-77.0) | 16.2 (11.1-21.4) | 24.4 (19.6-29.3) | 16.7 (11.7-21.7) | 4.4 (2.0-7.1)   | 101.8            |
|                 |              | Myanmar           | 91.9 (88.7-94.2) | 88.5 (84.2-91.7) | 19.8 (13.9-25.6) | 29.4 (24.3-34.2) | 20.1 (14.2-25.6) | 8.6 (5.9-11.2)  | 25.7             |
|                 |              | Sri Lanka         | 79.8 (72.8-85.3) | 72.9 (64.5-79.8) | 16.9 (11.6-22.3) | 25.5 (20.6-30.3) | 17.4 (12.3-22.6) | 5.3 (3.0-7.8)   | 8.8              |
|                 |              | Timor-Leste       | 89.7 (85.0-93.1) | 85.5 (79.4-90.2) | 19.3 (13.5-24.7) | 28.7 (23.6-33.6) | 19.6 (13.7-25.3) | 8.0 (5.4-10.6)  | 0.3              |
|                 | Low          |                   |                  |                  |                  |                  |                  |                 |                  |
|                 |              | Nepal             | 88.0 (85.5-90.5) | 83.3 (80.0-86.6) | 18.9 (13.3-24.4) | 28.1 (23.3-32.9) | 19.2 (13.7-24.5) | 7.5 (5.2-9.8)   | 11.0             |
| Western Pacific |              |                   |                  |                  |                  |                  |                  |                 |                  |
|                 | High         |                   |                  |                  |                  |                  |                  |                 |                  |
|                 |              | Australia         | 73.0 (66.0-78.9) | 64.8 (56.9-71.8) | 15.3 (10.3-20.5) | 23.4 (18.9-28.0) | 15.9 (11.1-20.6) | 3.5 (1.5-5.7)   | 5.0              |
|                 |              | Brunei Darussalam | 78.8 (69.4-86.0) | 71.6 (60.7-80.7) | 16.7 (11.3-22.4) | 25.2 (20.1-30.4) | 17.2 (11.9-22.5) | 5.0 (2.2-8.1)   | 0.1              |
|                 |              | French Polynesia  | 86.5 (81.3-90.4) | 81.3 (74.7-86.5) | 18.5 (13.0-24.0) | 27.7 (22.6-32.7) | 18.9 (13.2-24.2) | 7.1 (4.7-9.7)   | 0.1              |
|                 |              | Japan             | 66.2 (49.1-79.9) | 57.1 (39.6-73.0) | 13.7 (8.3-19.5)  | 21.2 (14.6-28.1) | 14.4 (9.1-20.2)  | 1.6 (-2.7-5.9)  | 37.1             |
|                 |              | New Zealand       | 60.7 (53.9-67.2) | 51.2 (44.3-58.2) | 12.5 (8.5-16.8)  | 19.4 (15.6-23.4) | 13.2 (9.3-17.3)  | 0.3 (-1.6-2.0)  | 0.8              |
|                 |              | Palau             | 71.7 (62.2-79.6) | 63.3 (52.8-72.6) | 15.0 (10.1-20.0) | 22.9 (18.1-27.9) | 15.7 (10.8-20.5) | 3.1 (0.6-5.8)   | 0.0 <sup>e</sup> |
|                 |              | Republic of Korea | 70.5 (54.4-82.7) | 61.9 (44.8-76.5) | 14.7 (9.1-20.8)  | 22.6 (16.3-29.1) | 15.4 (9.9-21.2)  | 2.7 (-1.7-7.0)  | 13.9             |
|                 |              | Singapore         | 65.7 (49.1-79.2) | 56.6 (39.6-72.1) | 13.6 (8.2-19.6)  | 21.0 (14.7-27.7) | 14.3 (9.1-20.1)  | 1.5 (-3.0-5.9)  | 1.1              |
|                 | Upper-middle |                   |                  |                  |                  |                  |                  |                 |                  |
|                 |              | American Samoa    | 50.7 (39.2-62.0) | 41.1 (30.5-52.6) | 10.3 (6.3-14.9)  | 16.2 (11.6-21.1) | 11.1 (7.1-15.3)  | -2.3 (-5.7-0.8) | 0.0 <sup>e</sup> |
|                 |              | China             | 84.0 (78.6-88.3) | 78.1 (71.4-83.7) | 18.0 (12.5-23.3) | 26.8 (21.9-31.7) | 18.4 (13.1-23.5) | 6.4 (4.1-8.9)   | 581.9            |
|                 |              | Cook Islands      | 90.2 (86.4-93.1) | 86.2 (81.2-90.2) | 19.4 (13.6-24.9) | 28.9 (23.8-33.7) | 19.7 (14.0-25.1) | 8.1 (5.6-10.7)  | 0.0 <sup>e</sup> |
|                 |              | Fiji              | 89.2 (84.9-92.3) | 84.9 (79.3-89.1) | 19.1 (13.4-24.7) | 28.5 (23.6-33.4) | 19.5 (13.9-24.8) | 7.8 (5.3-10.4)  | 0.5              |
|                 |              | Malaysia          | 65.4 (56.4-73.4) | 56.2 (46.8-65.2) | 13.6 (9.1-18.4)  | 20.9 (16.5-25.6) | 14.3 (9.8-18.9)  | 1.4 (-0.9-3.9)  | 7.4              |
|                 |              | Marshall Islands  | 63.0 (53.3-71.7) | 53.6 (43.7-63.3) | 13.0 (8.5-17.8)  | 20.1 (15.6-24.9) | 13.8 (9.4-18.3)  | 0.8 (-1.7-3.4)  | 0.0 <sup>e</sup> |
|                 |              | Nauru             | 65.1 (54.7-74.2) | 55.9 (45.1-66.2) | 13.5 (8.8-18.5)  | 20.8 (16.1-25.8) | 14.2 (9.6-19.0)  | 1.4 (-1.3-4.1)  | 0.0 <sup>e</sup> |
|                 |              | Samoa             | 91.8 (88.5-94.2) | 88.4 (84.0-91.7) | 19.8 (14.0-25.5) | 29.4 (24.2-34.3) | 20.0 (14.2-25.6) | 8.6 (5.9-11.2)  | 0.1              |
|                 |              | Tonga             | 91.5 (88.1-94.1) | 88.0 (83.4-91.6) | 19.7 (14.0-25.3) | 29.3 (24.3-34.2) | 19.9 (14.1-25.4) | 8.5 (5.9-11.1)  | 0.0              |

|  |              |                                  |                  |                  |                  |                  |                  |                |                  |
|--|--------------|----------------------------------|------------------|------------------|------------------|------------------|------------------|----------------|------------------|
|  |              | Tuvalu                           | 82.5 (76.3-87.3) | 76.2 (68.6-82.4) | 17.6 (12.3-22.9) | 26.3 (21.5-31.3) | 18.0 (12.6-23.2) | 6.0 (3.7-8.6)  | 0.0 <sup>e</sup> |
|  | Lower-middle |                                  |                  |                  |                  |                  |                  |                |                  |
|  |              | Cambodia                         | 90.2 (85.6-93.4) | 86.2 (80.2-90.6) | 19.4 (13.5-25.1) | 28.8 (23.8-33.8) | 19.7 (14.0-25.0) | 8.1 (5.4-10.8) | 4.9              |
|  |              | Federated States of Micronesia   | 63.4 (54.0-71.8) | 54.1 (44.4-63.4) | 13.1 (8.7-17.8)  | 20.2 (15.7-24.9) | 13.8 (9.4-18.4)  | 0.9 (-1.5-3.4) | 0.0              |
|  |              | Kiribati                         | 65.5 (56.3-73.7) | 56.3 (46.7-65.6) | 13.6 (9.0-18.4)  | 20.9 (16.4-25.7) | 14.3 (9.7-18.8)  | 1.5 (-1.0-4.0) | 0.0              |
|  |              | Lao People's Democratic Republic | 88.3 (86.6-90.0) | 83.7 (81.5-86.0) | 19.0 (13.4-24.5) | 28.2 (23.3-32.8) | 19.3 (13.8-24.5) | 7.6 (5.3-9.9)  | 2.2              |
|  |              | Mongolia                         | 82.2 (77.1-86.4) | 75.8 (69.6-81.2) | 17.5 (12.1-22.8) | 26.2 (21.4-30.8) | 17.9 (12.7-23.0) | 5.9 (3.8-8.2)  | 1.3              |
|  |              | Niue                             | 92.2 (89.0-94.6) | 88.9 (84.6-92.3) | 20.0 (14.1-25.6) | 29.4 (24.3-34.4) | 20.1 (14.2-25.7) | 8.7 (6.1-11.3) | 0.0 <sup>e</sup> |
|  |              | Papua New Guinea                 | 88.6 (83.0-92.5) | 84.1 (76.8-89.3) | 19.0 (13.2-24.7) | 28.3 (23.3-33.3) | 19.3 (13.7-24.7) | 7.7 (5.0-10.4) | 3.2              |
|  |              | Philippines                      | 69.9 (62.1-76.6) | 61.2 (52.7-69.0) | 14.6 (10.0-19.4) | 22.3 (17.9-26.9) | 15.2 (10.6-19.9) | 2.6 (0.5-4.9)  | 34.6             |
|  |              | Solomon Islands                  | 86.7 (81.8-90.5) | 81.6 (75.3-86.6) | 18.6 (13.1-24.0) | 27.7 (22.8-32.5) | 18.9 (13.2-24.2) | 7.1 (4.8-9.7)  | 0.2              |
|  |              | Tokelau                          | 95.5 (93.3-97.0) | 93.5 (90.4-95.6) | 20.7 (14.6-26.3) | 30.5 (25.3-35.5) | 20.8 (14.8-26.6) | 9.6 (6.7-12.3) | 0.0 <sup>e</sup> |
|  |              | Vanuatu                          | 92.8 (89.6-95.1) | 89.8 (85.4-93.0) | 20.1 (14.2-25.8) | 29.7 (24.5-34.6) | 20.3 (14.4-25.8) | 8.8 (6.1-11.5) | 0.1              |
|  |              | Viet Nam                         | 80.1 (73.9-85.2) | 73.2 (65.8-79.6) | 17.0 (11.7-22.2) | 25.6 (20.9-30.3) | 17.5 (12.3-22.5) | 5.3 (3.1-7.7)  | 28.8             |

Number of deaths averted for males and females may not add up to the estimate for both sexes. This is because the distributions of deaths across males and females are not even, and differences are magnified when multiplied by a derivative of activity prevalence which also varies considerably by sex.

a: The main estimates calculated using Formula 3 (see Box 1), the adjusted relative risk, and 0% activity counterfactual.

b: The unadjusted estimates calculated using Formula 2 (see Box 1), the unadjusted relative risk, and 0% activity counterfactual.

c: The partially adjusted estimates calculated using Formula 2 (see Box 1), the adjusted relative risk, and 0% activity counterfactual.

d: The adjusted estimates calculated using Formula 5 (see Appendix 10, pp23-25), the adjusted relative risk, and 54.3% activity counterfactual.

e: Deaths averted based on an imputed estimate of total deaths between the ages of 40-79 years. This was derived using the median ratio of deaths to total population for countries in the same region/income categories (Appendix 9, p22).
